# Supplementary material for: Graph-Representation of Patient Data: a Systematic Literature Review
Source: Springer Nature journal article supplement (doi:10.1007/s10916-020-1538-4), 2020-03-12
Supplement: MOESM1 [file 17793162]

**MEDLINE:**

((("medical record"[title/abstract]) OR ("patient record"[title/abstract]) OR ("health record"[title/abstract]) OR (health record[MeSH Terms])) AND (graph[title/abstract] OR graphs[title/abstract]) ) OR (((("medical records"[title/abstract]) OR ("patient records"[title/abstract]) OR ("health records"[title/abstract]) OR (health records[MeSH Terms])) AND (graph[title/abstract] OR graphs[title/abstract]))

**Web of Science:**

(TS=(((("patient record") OR ("health record") OR ("medical record"))) AND (graph OR graphs))) OR (TS=(((("patient records") OR ("health records") OR ("medical records"))) AND (graph OR graphs)))

**IEEE Xplore:**

((graph OR graphs) AND ("patient record" OR "health record" OR "medical record")) OR ((graph OR graphs) AND ("patient records" OR "health records" OR "medical records"))

**ACM digital library:**

recordTitle:(+health +record +graph) OR recordAbstract:(+health +record +graph) OR recordTitle:(+medical +record +graph) OR recordAbstract:(+medical +record +graph) OR recordTitle:(+patient +record +graph) OR recordAbstract:(+patient +record +graph) OR recordTitle:(+health +records +graph) OR recordAbstract:(+health +records +graph) OR recordTitle:(+medical +records +graph) OR recordAbstract:(+medical +records +graph) OR recordTitle:(+patient +records +graph) OR recordAbstract:(+patient +records +graph)

**Suppl. Fig. 1** queries of database search for the four different databases MEDLINE, Web of Science, IEEE Xplore, ACM digital library.

**Title:** Graph-Representation of Patient Data

A Systematic Literature Review

**Journal:** Journal of Medical Systems

**Authors:**

Jens Schrodt, [jens.schrodt@med.uni-heidelberg.de](mailto:jens.schrodt@med.uni-heidelberg.de) Universitätsklinikum Heidelberg Institut für Medizinische Biometrie und Informatik, Im Neuenheimer Feld 130.3, 69120 Heidelberg, Germany, orcid: 0000-0002-9768-4781

Aleksei Dudchenko, [Aleksei.Dudchenko@med.uni-heidelberg.de](mailto:Aleksei.Dudchenko@med.uni-heidelberg.de) Universitätsklinikum Heidelberg Institut für Medizinische Biometrie und Informatik, Im Neuenheimer Feld 130.3, 69120 Heidelberg, Germany

Petra Knaup, [petra.knaup@med.uni-heidelberg.de](mailto:petra.knaup@med.uni-heidelberg.de) Universitätsklinikum Heidelberg Institut für Medizinische Biometrie und Informatik, Im Neuenheimer Feld 130.3, 69120 Heidelberg, Germany

Matthias Ganzinger, [matthias.ganzinger@med.uni-heidelberg.de](mailto:matthias.ganzinger@med.uni-heidelberg.de) Universitätsklinikum Heidelberg Institut für Medizinische Biometrie und Informatik, Im Neuenheimer Feld 130.3, 69120 Heidelberg, Germany
