# Supplementary material for: Graph-Representation of Patient Data: a Systematic Literature Review
Source: Springer Nature journal article supplement (doi:10.1007/s10916-020-1538-4), 2020-03-12
Supplement: MOESM2 [file 17793162]

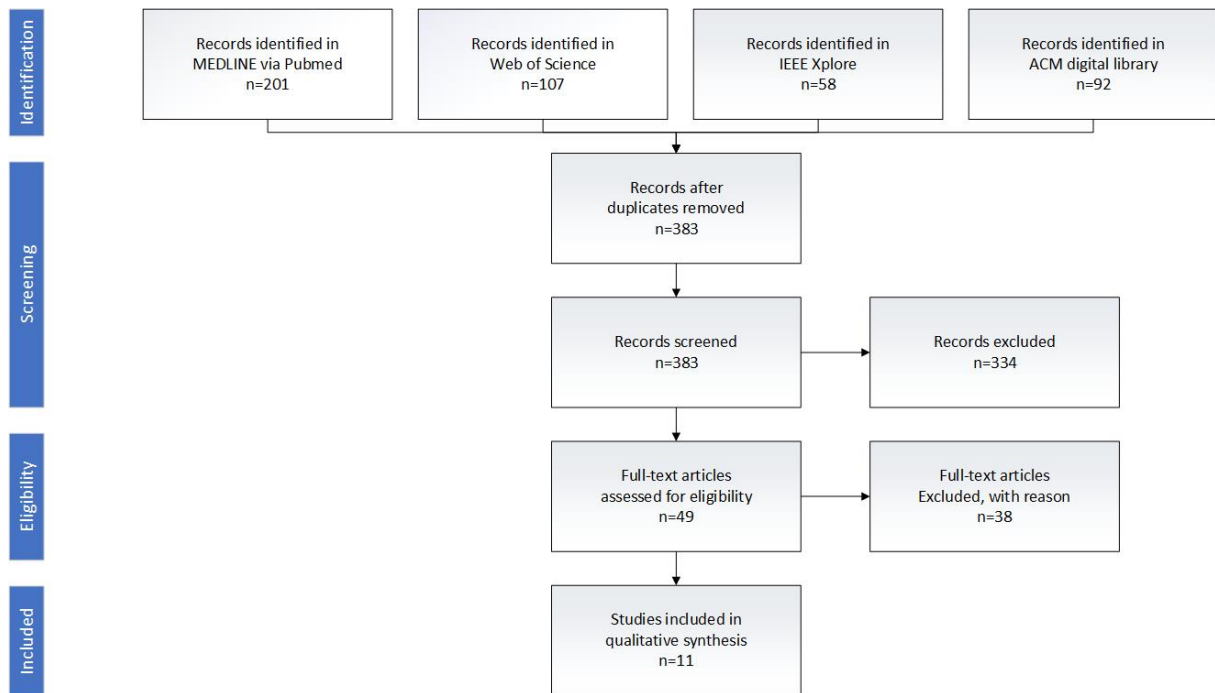

**Suppl. Fig. 2** PRISMA flow chart. The number of articles handled at each step of the PRISMA workflow [20].

**Title:** Graph-Representation of Patient Data  
A Systematic Literature Review

**Journal:** Journal of Medical Systems

**Authors:**

Jens Schrodt, [jens.schrodt@med.uni-heidelberg.de](mailto:jens.schrodt@med.uni-heidelberg.de) Universitätsklinikum Heidelberg Institut für Medizinische Biometrie und Informatik, Im Neuenheimer Feld 130.3, 69120 Heidelberg, Germany, orcid: 0000-0002-9768-4781

Aleksei Dudchenko, [Aleksei.Dudchenko@med.uni-heidelberg.de](mailto:Aleksei.Dudchenko@med.uni-heidelberg.de) Universitätsklinikum Heidelberg Institut für Medizinische Biometrie und Informatik, Im Neuenheimer Feld 130.3, 69120 Heidelberg, Germany

Petra Knaup, [petra.knaup@med.uni-heidelberg.de](mailto:petra.knaup@med.uni-heidelberg.de) Universitätsklinikum Heidelberg Institut für Medizinische Biometrie und Informatik, Im Neuenheimer Feld 130.3, 69120 Heidelberg, Germany

Matthias Ganzinger, [matthias.ganzinger@med.uni-heidelberg.de](mailto:matthias.ganzinger@med.uni-heidelberg.de) Universitätsklinikum Heidelberg Institut für Medizinische Biometrie und Informatik, Im Neuenheimer Feld 130.3, 69120 Heidelberg, Germany
