# Supplementary material for: Graph-Representation of Patient Data: a Systematic Literature Review
Source: Springer Nature journal article supplement (doi:10.1007/s10916-020-1538-4), 2020-03-12
Supplement: MOESM3 [file 17793162]

**Title:** Graph-Representation of Patient Data  
A Systematic Literature Review

**Journal:** Journal of Medical Systems

**Authors:**

Jens Schrodtt, [jens.schrodtt@med.uni-heidelberg.de](mailto:jens.schrodtt@med.uni-heidelberg.de) Universitätsklinikum Heidelberg Institut für Medizinische Biometrie und Informatik, Im Neuenheimer Feld 130.3, 69120 Heidelberg, Germany, orcid: 0000-0002-9768-4781

Aleksei Dudchenko, [Aleksei.Dudchenko@med.uni-heidelberg.de](mailto:Aleksei.Dudchenko@med.uni-heidelberg.de) Universitätsklinikum Heidelberg Institut für Medizinische Biometrie und Informatik, Im Neuenheimer Feld 130.3, 69120 Heidelberg, Germany

Petra Knaup, [petra.knaup@med.uni-heidelberg.de](mailto:petra.knaup@med.uni-heidelberg.de) Universitätsklinikum Heidelberg Institut für Medizinische Biometrie und Informatik, Im Neuenheimer Feld 130.3, 69120 Heidelberg, Germany

Matthias Ganzinger, [matthias.ganzinger@med.uni-heidelberg.de](mailto:matthias.ganzinger@med.uni-heidelberg.de) Universitätsklinikum Heidelberg Institut für Medizinische Biometrie und Informatik, Im Neuenheimer Feld 130.3, 69120 Heidelberg, Germany

**Suppl. Fig. 3:** coding system created in MAXQDA

Codesystem [211]

- categorization [0]
- heterogeneous data mining [1]
- causal networking [2]
- database/data structure approach, SNOMED [1]
- structure representation [2]
- temporal event data mining [6]
- data source [0]
  - free-text records [1]
  - paper health records [1]
  - image-based information [2]
  - UNMC de-identified clinical research database [1]
  - SNOMED CT clinical findings [2]
  - Electronic Health Record (EHR) [11]
  - healthcare information system [2]
- overall purpose / function [0]
  - drug investigation [1]
  - information gaining [3]
  - quality improvement [2]
  - population management [1]
  - data mining [1]
  - data warehouse [1]
  - predictive modeling [2]
  - disease diagnosis [2]
  - disease pattern [1]
  - patient segmentation [2]
  - personalized medicine [6]
- graph [1]
  - patient graph [4]
  - node content [0]
    - chemical structure of drug [1]
    - words [1]
    - observation [1]

- emotion [1]
- procedures [2]
- functional vertices [4]
- matter [1]
- anatomic parts [3]
- patient [2]
- diagnosis [7]
- Electronic Health Records [1]
- clinical notes [1]
- problems [2]
- medications [5]
- vital signs [1]
- laboratory data [7]
- edge content [0]
  - causal relation [2]
  - properties [1]
  - word link [1]
  - patient drug prior associations [1]
  - drug similarity [1]
  - patient similarity [1]
  - number of combinations between nodes [0]
  - Anatomo-Functional relations [1]
  - matter relation [1]
  - spatial relations [2]
  - taxonomical relation [1]
  - status and date [1]
  - temporal relationships [6]
- graph properties [0]
  - undirected [0]
  - directed [8]
  - unweighted graph [0]
  - weighted graph [5]
    - average duration [2]
  - content of subgraphs [0]
    - detected phenotypes [1]
- supervision of information [0]
  - supervised information [2]
  - semi-supervised information [2]
  - unsupervised information [1]
- investigated diseases [0]
  - (childhood) leukemia [1]
  - coronary heart diseases (CHD) [1]
  - COPD [1]
  - hypercholesterolemia [1]
  - diabetes [1]
  - kardiovascular disease [1]
  - kidney failure [1]
  - geriatric diseases [1]
  - brain tumors [1]
  - pleural effusion [1]
  - Congestive Heart Failure (CHF) [2]
  - CHF with COPD precondition [2]
  - pneumonia due to an influenza [1]
  - parainfluenza virus [1]
  - breast cancer [2]
- investigated diseases ICD [0]
  - C71.\* | D33.\* | D43.\* brain tumors [1]
  - C50.\* breast cancer [2]

- C95.\* (childhood) leukemia [1]
- I25.\* coronary heart diseases (CHD) [1]
- I25.\* | I51.9 kardiovascular disease [1]
- I50.9 Congestive Heart Failure (CHF) [2]
- I50.9 | J44.\* CHF with COPD precondition [2]
- J44.\* COPD [1]
- J90.\* pleural effusion [1]
- J10.0 pneumonia due to an influenza [1]
- J12.2 parainfluenza virus [1]
- E78.0 hypercholesterolemia [1]
- E11.\* diabetes [1]
- N19.\* kidney failure [1]
- geriatric diseases [1]
- investigated diseases zusammengefasst [0]
  - cancer [4]
  - heart disease [6]
  - lung disease [6]
  - E78.0 hypercholesterolemia [1]
  - E11.\* diabetes [1]
  - N19.\* kidney failure [1]
  - geriatric diseases [1]
- processing of graph (technical) [0]
  - predictive modeling [1]
  - kind of storage [0]
    - GraphML [2]
    - graph database [1]
      - MongoDB [1]
      - neo4j [2]
    - SNOMED [2]
    - RDF [1]
  - conversion [0]
    - SNOMED to neo4j [1]
  - clustering [2]
  - similarity comparison of graphs [3]
- Sets [0]
