# Supplementary material for: Graph-Representation of Patient Data: a Systematic Literature Review
Source: Springer Nature journal article supplement (doi:10.1007/s10916-020-1538-4), 2020-03-12
Supplement: MOESM4 [file 17793162]

**Suppl. Table 1** chapters of ICD-10 code scheme and the number of diseases investigated in the chapters by the investigated articles.

| Chapter | Blocks      | Title                                                                                               | number |
|---------|-------------|-----------------------------------------------------------------------------------------------------|--------|
| I       | A00–<br>B99 | Certain infectious and parasitic diseases                                                           |        |
| II      | C00–<br>D48 | Neoplasms                                                                                           | 4      |
| III     | D50–<br>D89 | Diseases of the blood and blood-forming organs and certain disorders involving the immune mechanism |        |
| IV      | E00–<br>E90 | Endocrine, nutritional and metabolic diseases                                                       | 2      |
| V       | F00–F99     | Mental and behavioural disorders                                                                    |        |
| VI      | G00–<br>G99 | Diseases of the nervous system                                                                      |        |
| VII     | H00–<br>H59 | Diseases of the eye and adnexa                                                                      |        |
| VIII    | H60–<br>H95 | Diseases of the ear and mastoid process                                                             |        |
| IX      | I00–I99     | Diseases of the circulatory system                                                                  | 7      |
| X       | J00–J99     | Diseases of the respiratory system                                                                  | 6      |
| XI      | K00–<br>K93 | Diseases of the digestive system                                                                    |        |
| XII     | L00–<br>L99 | Diseases of the skin and subcutaneous tissue                                                        |        |

|       |             |                                                                                         |   |
|-------|-------------|-----------------------------------------------------------------------------------------|---|
| XIII  | M00–<br>M99 | Diseases of the musculoskeletal system and connective tissue                            |   |
| XIV   | N00–<br>N99 | Diseases of the genitourinary system                                                    | 1 |
| XV    | O00–<br>O99 | Pregnancy, childbirth and the puerperium                                                |   |
| XVI   | P00–P96     | Certain conditions originating in the perinatal period                                  |   |
| XVII  | Q00–<br>Q99 | Congenital malformations, deformations and chromosomal abnormalities                    |   |
| XVIII | R00–<br>R99 | Symptoms, signs and abnormal clinical and laboratory findings, not elsewhere classified |   |
| XIX   | S00–<br>T98 | Injury, poisoning and certain other consequences of external causes                     |   |
| XX    | V01–<br>Y98 | External causes of morbidity and mortality                                              |   |
| XXI   | Z00–<br>Z99 | Factors influencing health status and contact with health services                      |   |
| XXII  | U00–<br>U99 | Codes for special purposes                                                              |   |

**Suppl. Table 2** Agreement of reviewers in the first step

| <b>1<sup>st</sup> reviewer</b> |           | <b>2<sup>nd</sup> reviewer</b> |                | <b>Sum</b> |
|--------------------------------|-----------|--------------------------------|----------------|------------|
|                                |           | <b>Include</b>                 | <b>Exclude</b> |            |
| <b>Include</b>                 | 43        | 32                             | <b>75</b>      |            |
| <b>Exclude</b>                 | 31        | 277                            | <b>308</b>     |            |
| <b>Sum</b>                     | <b>74</b> | <b>309</b>                     | <b>383</b>     |            |
