# Supplementary material for: Graph-Representation of Patient Data: a Systematic Literature Review
Source: Springer Nature journal article supplement (doi:10.1007/s10916-020-1538-4), 2020-03-12
Supplement: MOESM5 [file 17793162]

**Title:** Graph-Representation of Patient Data  
A Systematic Literature Review

**Journal:** Journal of Medical Systems

**Authors:**

Jens Schrodtt, [jens.schrodtt@med.uni-heidelberg.de](mailto:jens.schrodtt@med.uni-heidelberg.de) Universitätsklinikum Heidelberg Institut für Medizinische Biometrie und Informatik, Im Neuenheimer Feld 130.3, 69120 Heidelberg, Germany, orcid: 0000-0002-9768-4781

Aleksei Dudchenko, [Aleksei.Dudchenko@med.uni-heidelberg.de](mailto:Aleksei.Dudchenko@med.uni-heidelberg.de) Universitätsklinikum Heidelberg Institut für Medizinische Biometrie und Informatik, Im Neuenheimer Feld 130.3, 69120 Heidelberg, Germany

Petra Knaup, [petra.knaup@med.uni-heidelberg.de](mailto:petra.knaup@med.uni-heidelberg.de) Universitätsklinikum Heidelberg Institut für Medizinische Biometrie und Informatik, Im Neuenheimer Feld 130.3, 69120 Heidelberg, Germany

Matthias Ganzinger, [matthias.ganzinger@med.uni-heidelberg.de](mailto:matthias.ganzinger@med.uni-heidelberg.de) Universitätsklinikum Heidelberg Institut für Medizinische Biometrie und Informatik, Im Neuenheimer Feld 130.3, 69120 Heidelberg, Germany

Suppl. Table 3:

| Author, editor or organization                                                                                                                                                                                                                                 | Title                                                                                                                                                            | Year | Ref. | Reviewer 1 reason                                                    | Reviewer 2 reason                                                    | Reviewer 3 reason |
|----------------------------------------------------------------------------------------------------------------------------------------------------------------------------------------------------------------------------------------------------------------|------------------------------------------------------------------------------------------------------------------------------------------------------------------|------|------|----------------------------------------------------------------------|----------------------------------------------------------------------|-------------------|
|                                                                                                                                                                                                                                                                | Abbs v. Sullivan                                                                                                                                                 | 1992 | [1]  | graph is not associated to an individual patient                     | term "graph" is used for something different than for patient graphs |                   |
| <b>Adin, C. A.; Gregory, C. R.; Kyles, A. E.; Cowgill, L.</b>                                                                                                                                                                                                  | Diagnostic predictors of complications and survival after renal transplantation in cats                                                                          | 2001 | [2]  | term "graph" is used for something different than for patient graphs | No graph mentioned                                                   |                   |
| <b>Agogo, George O.; van der Voet, Hilko; van't Veer, Pieter; Ferrari, Pietro; Leenders, Max; Muller, David C.; Sanchez-Cantalejo, Emilio; Bamia, Christina; Braaten, Tonje; Knuppel, Sven; Johansson, Ingegerd; van Eeuwijk, Fred A.; Boshuizen, Hendriek</b> | Use of two-part regression calibration model to correct for measurement error in episodically consumed foods in a single-replicate study design: EPIC case study | 2014 | [3]  | term "graph" is used for something different than for patient graphs | No graph mentioned                                                   |                   |
| <b>Amit, Moran; Yen, Tzu Chen; Liao, Chun Ta; Chaturvedi, Pankaj; Agarwal, Jai Prakash; Kowalski, Luiz Paulo; Kohler, Hugo F.; Ebrahimi, Ardan; Clark, Jonathan R.; Cernea, Claudio Roberto;</b>                                                               | The origin of regional failure in oral cavity squamous cell carcinoma with pathologically negative neck metastases                                               | 2014 | [4]  | term "graph" is used for something different than for patient graphs | No graph mentioned                                                   |                   |

|                                                                                                                                                                                                                                                              |                                                                                                                                                                                               |      |      |                                                                      |                               |  |
|--------------------------------------------------------------------------------------------------------------------------------------------------------------------------------------------------------------------------------------------------------------|-----------------------------------------------------------------------------------------------------------------------------------------------------------------------------------------------|------|------|----------------------------------------------------------------------|-------------------------------|--|
| <b>Brandao, Jose S.; Kreppel, Matthias; Zoller, Joachim E.; Leider-Trejo, Leonor; Bachar, Gideon; Shpitzer, Thomas; Bolzoni, Andrea Villaret; Patel, Raj P.; Jonnalagadda, Sashikanth; Robbins, Thomas Kevin; Shah, Jatin P.; Patel, Snehal G.; Gil, Ziv</b> |                                                                                                                                                                                               |      |      |                                                                      |                               |  |
| <b>Andreano, Anita; Reborra, Paola; Valsecchi, Maria Grazia; Russo, Antonio Giampiero</b>                                                                                                                                                                    | Adherence to guidelines and breast cancer patients survival: a population-based cohort study analyzed with a causal inference approach                                                        | 2017 | [5]  | term "graph" is used for something different than for patient graphs | No graph theory               |  |
| <b>Anindya, Imrul Chowdhury; Roy, Harichandan; Kantarcioglu, Murat; Malin, Bradley</b>                                                                                                                                                                       | Building a Dossier on the Cheap: Integrating Distributed Personal Data Resources Under Cost Constraints                                                                                       | 2017 | [6]  | term "graph" is used for something different than for patient graphs | No EHR data                   |  |
| <b>Antani, S.</b>                                                                                                                                                                                                                                            | Integrating image and text information for biomedical information retrieval                                                                                                                   | 2010 | [7]  | term "graph" is used for something different than for patient graphs | Graph as image                |  |
| <b>Anwar, Muhammad Naveed; Oakes, Michael Philip</b>                                                                                                                                                                                                         | Data Mining of Audiology Patient Records: Factors Influencing the Choice of Hearing Aid Type                                                                                                  | 2011 | [8]  | term "graph" is used for something different than for patient graphs | Graph used for audiogram      |  |
| <b>Anwar, Muhammad N.; Oakes, Michael P.</b>                                                                                                                                                                                                                 | Data mining of audiology patient records: factors influencing the choice of hearing aid type                                                                                                  | 2012 | [9]  | term "graph" is used for something different than for patient graphs | Graph used for audiogram      |  |
| <b>Arcilla, Mary Jane B.; Ang, Viana Celina T.; Ochoa, Mikaela Nazarene; Padua, Christian Paulo L.; Payawal, Riezl E.</b>                                                                                                                                    | Kidnew: The Kidney Transplant Patient Personal Health Buddy                                                                                                                                   | 2015 | [10] | term "graph" is used for something different than for patient graphs | Graph as image                |  |
| <b>Atreja, Ashish; Khan, Sameer; Rogers, Jason D.; Ootob, Emamuzo; Patel, Nishant P.; Ullman, Thomas; Colombel, Jean Fred; Moore, Shirley; Sands, Bruce E.</b>                                                                                               | Impact of the Mobile HealthPROMISE Platform on the Quality of Care and Quality of Life in Patients With Inflammatory Bowel Disease: Study Protocol of a Pragmatic Randomized Controlled Trial | 2015 | [11] | term "graph" is used for something different than for patient graphs | Graph as image                |  |
| <b>Bakel, Leigh Anne; Wilson, Karen; Tyler, Amy; Tham, Eric; Reese, Jennifer; Bothner, Joan; Kaplan, David W.</b>                                                                                                                                            | A quality improvement study to improve inpatient problem list use                                                                                                                             | 2014 | [12] | term "graph" is used for something different than for patient graphs | Graph as image                |  |
| <b>Baptista Macaroff, W. M.; Castroman Espasandin, P.</b>                                                                                                                                                                                                    | Analgesic quality in a postoperative pain service: continuous assessment with the cumulative sum (cusum) method                                                                               | 2007 | [13] | term "graph" is used for something different than for patient graphs | Hospital performance modelled |  |
| <b>Barsky, Marina; Stege, Ulrike; Thomo, Alex; Upton, Chris</b>                                                                                                                                                                                              | A Graph Approach to the Threshold All-against-all Substring Matching Problem                                                                                                                  | 2008 | [14] | term "graph" is used for something different than for patient graphs | no patient data               |  |
| <b>Bassily, Mena N.; Wilson, Richard; Pompei, Francesco; Burmistrov, Dimitriy</b>                                                                                                                                                                            | Cancer survival as a function of age at diagnosis: a study of the Surveillance, Epidemiology and End Results database                                                                         | 2010 | [15] | term "graph" is used for something different than for patient graphs | Graph as image                |  |

|                                                                                                                                                       |                                                                                                                                                             |      |      |                                                                      |                              |  |
|-------------------------------------------------------------------------------------------------------------------------------------------------------|-------------------------------------------------------------------------------------------------------------------------------------------------------------|------|------|----------------------------------------------------------------------|------------------------------|--|
| <b>Baud, R. H.; Am RASSINOX; SCHERRER, [JR]</b>                                                                                                       | NATURAL-LANGUAGE PROCESSING AND SEMANTICAL REPRESENTATION OF MEDICAL TEXTS                                                                                  | 1992 | [16] | graph is not associated to an individual patient                     | no patient data              |  |
| <b>Baud, R. H.; Am RASSINOX; WAGNER, J. C.; Lovis, C.; JUGE, C.; ALPAY, L. L.; Michel, P. A.; Degoulet, P.; SCHERRER, [JR]</b>                        | REPRESENTING CLINICAL NARRATIVES USING CONCEPTUAL GRAPHS                                                                                                    | 1995 | [17] | graph is not associated to an individual patient                     | focus on language processing |  |
| <b>Baud, R. H.; Rassinoux, A. M.; Scherrer, J. R.</b>                                                                                                 | Natural language processing and semantical representation of medical texts                                                                                  | 1992 | [18] | Dublette                                                             | focus on language processing |  |
| <b>Bean, Daniel M.; Wu, Honghan; Iqbal, Ehtesham; Dzahini, Olubanke; Ibrahim, Zina M.; Broadbent, Matthew; Stewart, Robert; Dobson, Richard J. B.</b> | Knowledge graph prediction of unknown adverse drug reactions and validation in electronic health records                                                    | 2017 | [19] | graph is not associated to an individual patient                     | no patient data modelled     |  |
| <b>Bean, Daniel M.; Wu, Honghan; Iqbal, Ehtesham; Dzahini, Olubanke; Ibrahim, Zina M.; Broadbent, Matthew; Stewart, Robert; Dobson, Richard J. B.</b> | Author Correction: Knowledge graph prediction of unknown adverse drug reactions and validation in electronic health records                                 | 2018 | [20] | Dublette                                                             | no patient data modelled     |  |
| <b>Beilin, L. J.; Bulpitt, C. J.; Coles, E. C.; Dollery, C. T.; Johnson, B. F.; Mearns, C.; Munro-Faure, A. D.; Turner, S. C.</b>                     | Computer-based hypertension clinic records: a co-operative study                                                                                            | 1974 | [21] | term "graph" is used for something different than for patient graphs | Graph as image               |  |
| <b>Bellin, Eran; Kalkut, Gary</b>                                                                                                                     | Is time-slice analysis superior to total hospital length of stay in demonstrating the effectiveness of a month-long intensive effort on a medicine service? | 2004 | [22] | term "graph" is used for something different than for patient graphs | graph as visualization       |  |
| <b>Benedik, Peter; Rajkovic, Uros; Sustersic, Olga</b>                                                                                                | Toward the design of a nursing ontology system                                                                                                              | 2014 | [23] | graph is not associated to an individual patient                     | no patient data modelled     |  |
| <b>Bereg, Sergey; Zhang, Yuanyi</b>                                                                                                                   | Phylogenetic Networks Based on the Molecular Clock Hypothesis                                                                                               | 2007 | [24] | term "graph" is used for something different than for patient graphs | No graph theory mentioned    |  |
| <b>Bernauer, J.; Franz, M.; Schoop, D.; Schoop, M.; Pretschner, D. P.</b>                                                                             | The compositional approach for representing medical concept systems                                                                                         | 1995 | [25] | graph is not associated to an individual patient                     | focus on language processing |  |
| <b>Bertrand, Denis; Gascuel, Olivier</b>                                                                                                              | Topological Rearrangements and Local Search Method for Tandem Duplication Trees                                                                             | 2005 | [26] | term "graph" is used for something different than for patient graphs | no patient data modelled     |  |
| <b>Bingham, A.</b>                                                                                                                                    | Computerized patient records benefit physician offices                                                                                                      | 1997 | [27] | term "graph" is used for something different than for patient graphs | Graph as image               |  |
| <b>Bono, B. de; Helvensteijn, M.; Kokash, N.; Martorelli, I.; Sarwar, D.; Islam, S.; Grenon, P.; Hunter, P.</b>                                       | Requirements for the formal representation of pathophysiology mechanisms by clinicians                                                                      | 2016 | [28] | graph is not associated to an individual patient                     | No graph mentioned           |  |
| <b>Bordewich, Magnus; Gascuel, Olivier; Huber, Katharina T.; Moulton, Vincent</b>                                                                     | Consistency of Topological Moves Based on the Balanced Minimum Evolution Principle of Phylogenetic Inference                                                | 2009 | [29] | term "graph" is used for something different than for patient graphs | no patient data modelled     |  |

|                                                                                                                            |                                                                                                                                                                         |      |      |                                                                      |                                                 |  |
|----------------------------------------------------------------------------------------------------------------------------|-------------------------------------------------------------------------------------------------------------------------------------------------------------------------|------|------|----------------------------------------------------------------------|-------------------------------------------------|--|
| <b>Brewer, Noel T.; Gilkey, Melissa B.; Lillie, Sarah E.; Hesse, Bradford W.; Sheridan, Stacey L.</b>                      | Tables or bar graphs? Presenting test results in electronic medical records                                                                                             | 2012 | [30] | term "graph" is used for something different than for patient graphs | graph as visualization                          |  |
| <b>Britto, Maria T.; Jimison, Holly B.; Munafo, Jennifer Knopf; Wissman, Jennifer; Rogers, Michelle L.; Hersh, William</b> | Usability testing finds problems for novice users of pediatric portals                                                                                                  | 2009 | [31] | term "graph" is used for something different than for patient graphs | graph as visualization                          |  |
| <b>Brown, A. L.</b>                                                                                                        | Constructing Chromosome Scale Suffix Trees                                                                                                                              | 2004 | [32] | term "graph" is used for something different than for patient graphs | No graph theory                                 |  |
| <b>Buchtela, David; Anger, Zdenek; Peleska, Jan; Vesely, Arnost; Zvarova, Jana</b>                                         | Presentation of medical guidelines on a computer                                                                                                                        | 2004 | [33] | term "graph" is used for something different than for patient graphs | no patient data but medical guidelines modelled |  |
| <b>Bui, Aleex A. T.; Taira, Ricky K.; Churchill, Bernard; Kangarloo, Hooshang</b>                                          | Integrated visualization of problemcentric urologic patient records                                                                                                     | 2002 | [34] | term "graph" is used for something different than for patient graphs | graph as visualization                          |  |
| <b>Burgess, H. A.</b>                                                                                                      | Use of the labor graph in Malawi                                                                                                                                        | 1986 | [35] | term "graph" is used for something different than for patient graphs | graph as visualization                          |  |
| <b>Butch, S. H.</b>                                                                                                        | Practical use of computerized hospital information systems to improve blood transfusion                                                                                 | 1997 | [36] | term "graph" is used for something different than for patient graphs | graph as visualization                          |  |
| <b>Cates, W. [JR]</b>                                                                                                      | Legal abortion: the public health record                                                                                                                                | 1982 | [37] | term "graph" is used for something different than for patient graphs | No graph theory                                 |  |
| <b>Cen, Songxiang; Han, Li; Ma, Jian</b>                                                                                   | Ranking Weblogs by Analyzing Reading and Commenting Activities                                                                                                          | 2009 | [38] | graph is not associated to an individual patient                     | no patient data modelled                        |  |
| <b>Chazelle, Bernard</b>                                                                                                   | Technical Perspective: Finding a Good Neighbor, Near and Fast                                                                                                           | 2008 | [39] | term "graph" is used for something different than for patient graphs | no patient data                                 |  |
| <b>Chen, Peng-Lai; Zhao, Ting; Feng, Rui; Chai, Jing; Tong, Gui-Xian; Wang, De-Bin</b>                                     | Patterns and trends with cancer incidence and mortality rates reported by the China National Cancer Registry                                                            | 2014 | [40] | term "graph" is used for something different than for patient graphs | graph as visualization                          |  |
| <b>Chennamsetty, H.; Chalasani, S.; Riley, D.</b>                                                                          | Predictive analytics on Electronic Health Records (EHRs) using Hadoop and Hive                                                                                          | 2015 | [41] | term "graph" is used for something different than for patient graphs | Graph as image                                  |  |
| <b>Christinat, Yann; Moret, Bernard M. E.</b>                                                                              | A Transcript Perspective on Evolution                                                                                                                                   | 2013 | [42] | term "graph" is used for something different than for patient graphs | no patient data                                 |  |
| <b>Christofidis, Melany J.; Hill, Andrew; Horswill, Mark S.; Watson, Marcus O.</b>                                         | Observation charts with overlapping blood pressure and heart rate graphs do not yield the performance advantage that health professionals assume: an experimental study | 2014 | [43] | term "graph" is used for something different than for patient graphs | graph as visualization                          |  |

|                                                                                                                             |                                                                                                                                                          |      |      |                                                                      |                                                  |  |
|-----------------------------------------------------------------------------------------------------------------------------|----------------------------------------------------------------------------------------------------------------------------------------------------------|------|------|----------------------------------------------------------------------|--------------------------------------------------|--|
| <b>Chung, Hyun Hoon; Kim, Jae Weon; Kang, Keon Wook; Park, Noh-Hyun; Song, Yong-Sang; Chung, June-Key; Kang, Soon-Beom</b>  | Post-treatment (1)(8)FFDG maximum standardized uptake value as a prognostic marker of recurrence in endometrial carcinoma                                | 2011 | [44] | term "graph" is used for something different than for patient graphs | No graph theory                                  |  |
| <b>Cimino, J. J.; Clayton, P. D.; Hripcsak, G.; Johnson, S. B.</b>                                                          | Knowledge-based approaches to the maintenance of a large controlled medical terminology                                                                  | 1994 | [45] | graph is not associated to an individual patient                     | no patient data but medical terminology modelled |  |
| <b>Collier, Timothy; Steenkamp, Retha; Tomson, Charlie; Caskey, Fergus; Ansell, David; Roderick, Paul; Nitsch, Dorothea</b> | Patterns and effects of missing comorbidity data for patients starting renal replacement therapy in England, Wales and Northern Ireland                  | 2011 | [46] | term "graph" is used for something different than for patient graphs | graph as visualization                           |  |
| <b>Cota, Erika; Ribeiro, Leila; Bezerra, Jonas Santos; Costa, Andrei; da Silva, Rosiana Estefane; Cota, Glaucia</b>         | Using formal methods for content validation of medical procedure documents                                                                               | 2017 | [47] | graph is not associated to an individual patient                     | no patient data                                  |  |
| <b>Cruz, J. P.; Libatique, N. J.; Tangonan, G.</b>                                                                          | Steganography and data hiding in flash video (FLV)                                                                                                       | 2012 | [48] | term "graph" is used for something different than for patient graphs | no patient data                                  |  |
| <b>Cypko, M. A.; Wojdziak, J.; Stoehr, M.; Kirchner, B.; Preim, B.; Dietz, A.; Lemke, H. U.; Oeltze-Jafra, S.</b>           | Visual Verification of Cancer Staging for Therapy Decision Support                                                                                       | 2017 | [49] | graph is not associated to an individual patient                     | graph as visualization                           |  |
| <b>Dabek, F.; Caban, J. J.</b>                                                                                              | A grammar-based approach to model the patient's clinical trajectory after a mild traumatic brain injury                                                  | 2015 | [50] | graph is not associated to an individual patient                     | no data of individual patients                   |  |
| <b>Dabek, Filip; Chen, Jian; Garbarino, Alexander; Caban, Jesus J.</b>                                                      | Visualization of Longitudinal Clinical Trajectories Using a Graph-based Approach                                                                         | 2015 | [51] | graph is not associated to an individual patient                     | no data of individual patients                   |  |
| <b>Dahl, Mads Ronald; Vedsted, Peter</b>                                                                                    | Personal data and confidentiality on the Internet                                                                                                        | 2008 | [52] | term "graph" is used for something different than for patient graphs | no data of individual patients                   |  |
| <b>Danaei, Goodarz; Garcia Rodriguez, Luis A.; Fernandez Cantero, Oscar; Logan, Roger; Hernan, Miguel A.</b>                | Observational data for comparative effectiveness research: An emulation of randomised trials of statins and primary prevention of coronary heart disease | 2013 | [53] | term "graph" is used for something different than for patient graphs | No graph theory mentioned                        |  |
| <b>Davidson, Shmuel; Natan, Dafna; Novikov, Ilya; Sokolover, Nir; Erlich, Avi; Shamir, Raanan</b>                           | Body mass index and weight-for-length ratio references for infants born at 33-42 weeks gestation: a new tool for anthropometric assessment               | 2011 | [54] | term "graph" is used for something different than for patient graphs | Graph as image                                   |  |
| <b>Degnan, James H.; Rosenberg, Noah A.; Stadler, Tanja</b>                                                                 | A Characterization of the Set of Species Trees That Produce Anomalous Ranked Gene Trees                                                                  | 2012 | [55] | term "graph" is used for something different than for patient graphs | graph as visualization                           |  |
| <b>Delman, B. S.</b>                                                                                                        | A problem-oriented approach to journal selection for hospital libraries                                                                                  | 1982 | [56] | term "graph" is used for something different than for patient graphs | no patient data                                  |  |

|                                                                                                                                                                                         |                                                                                                                                |      |      |                                                                      |                                           |  |
|-----------------------------------------------------------------------------------------------------------------------------------------------------------------------------------------|--------------------------------------------------------------------------------------------------------------------------------|------|------|----------------------------------------------------------------------|-------------------------------------------|--|
| <b>Dent, R. M.; Penwarden, R. M.; Harris, N.; Hotz, S. B.</b>                                                                                                                           | Development and evaluation of patient-centered software for a weight-management clinic                                         | 2002 | [57] | term "graph" is used for something different than for patient graphs | graph as visualization                    |  |
| <b>Dietz, Kelly R.; Zhang, Lei; Seidel, Frank G.</b>                                                                                                                                    | The transverse diameter of the chest on routine radiographs reliably estimates gestational age and weight in premature infants | 2015 | [58] | term "graph" is used for something different than for patient graphs | Graph as image                            |  |
| <b>Diprose, G. K.; Evans, D. H.; Levene, M. I.</b>                                                                                                                                      | A microcomputer monitoring and data-acquisition system for intensive care units                                                | 1985 | [59] | term "graph" is used for something different than for patient graphs | graph as visualization                    |  |
| <b>Elliott, Doug; Allen, Emily; McKinley, Sharon; Perry, Lin; Duffield, Christine; Fry, Margaret; Gallagher, Robyn; Iedema, Rick; Roche, Michael</b>                                    | User acceptance of observation and response charts with a track and trigger system: a multisite staff survey                   | 2016 | [60] | term "graph" is used for something different than for patient graphs | graph as visualization                    |  |
| <b>Engholm, Gerda; Ferlay, Jacques; Christensen, Niels; Bray, Freddie; Gjerstorff, Marianne L.; Klint, Asa; Kotlum, Joanis E.; Olafsdottir, Elinborg; Pukkala, Eero; Storm, Hans H.</b> | NORDCAN--a Nordic tool for cancer information, planning, quality control and research                                          | 2010 | [61] | term "graph" is used for something different than for patient graphs | graph as visualization                    |  |
| <b>Erkal, Sibel; Gerberich, Susan Goodwin; Ryan, Andrew D.; Renier, Colleen M.; Alexander, Bruce H.</b>                                                                                 | Animal-related injuries: a population-based study of a five-state region in the upper Midwest: Regional Rural Injury Study II  | 2008 | [62] | graph is not associated to an individual patient                     | no data of individual patients            |  |
| <b>Evandt, Jorunn; Oftedal, Bente; Krog, Norun Hjertager; Skurtveit, Svetlana; Nafstad, Per; Schwarze, Per E.; Skovlund, Eva; Houthuijs, Danny; Aasvang, Gunn Marit</b>                 | Road traffic noise and registry based use of sleep medication                                                                  | 2017 | [63] | term "graph" is used for something different than for patient graphs | No graph theory                           |  |
| <b>Evans, J. M.; MacDonald, T. M.</b>                                                                                                                                                   | Misclassification and selection bias in case-control studies using an automated database                                       | 1997 | [64] | term "graph" is used for something different than for patient graphs | graph as visualization                    |  |
| <b>Faeder, James R.; Blinov, Michael L.; Hlavacek, William S.</b>                                                                                                                       | Graphical Rule-based Representation of Signal-transduction Networks                                                            | 2005 | [65] | graph is not associated to an individual patient                     | graph as visualization                    |  |
| <b>Faloutsos, Christos</b>                                                                                                                                                              | Future Directions in Data Mining: Streams, Networks, Self-similarity and Power Laws                                            | 2002 | [66] | graph is not associated to an individual patient                     | no patient data                           |  |
| <b>Faloutsos, Christos; Kamel, Ibrahim</b>                                                                                                                                              | Beyond Uniformity and Independence: Analysis of R-trees Using the Concept of Fractal Dimension                                 | 1994 | [67] | term "graph" is used for something different than for patient graphs | no patient data                           |  |
| <b>Fan, Kai; Eisenberg, Marisa; Walsh, Alison; Aiello, Allison; Heller, Katherine</b>                                                                                                   | Hierarchical Graph-Coupled HMMs for Heterogeneous Personalized Health Data                                                     | 2015 | [68] | term "graph" is used for something different than for patient graphs | graph not used for modelling patient data |  |
| <b>Farfan, F.; Hristidis, V.; Ranganathan, A.; Burke, R. P.</b>                                                                                                                         | Ontology-Aware Search on XML-based Electronic Medical Records                                                                  | 2008 | [69] | graph is not associated to an individual patient                     | No graph theory                           |  |

|                                                                                                                                                                                                                                                                                            |                                                                                                                                              |      |      |                                                                      |                                |  |
|--------------------------------------------------------------------------------------------------------------------------------------------------------------------------------------------------------------------------------------------------------------------------------------------|----------------------------------------------------------------------------------------------------------------------------------------------|------|------|----------------------------------------------------------------------|--------------------------------|--|
| <b>Fazeli Dehkordy, Soudabeh; Carlos, Ruth C.; Hall, Kelli S.; Dalton, Vanessa K.</b>                                                                                                                                                                                                      | Novel data sources for women's health research: mapping breast screening online information seeking through Google trends                    | 2014 | [70] | term "graph" is used for something different than for patient graphs | graph as visualization         |  |
| <b>Feng, Jianxing; Zhu, Daming</b>                                                                                                                                                                                                                                                         | Faster Algorithms for Sorting by Transpositions and Sorting by Block Interchanges                                                            | 2007 | [71] | term "graph" is used for something different than for patient graphs | no patient data                |  |
| <b>Ferreira, Tania S.; Luiz de Souza-Braga, Andre; Soraia Cavalcanti-Valente, Geilsa; Ferreira de Souza, Deise; Moreira Carvalho-Alves, Enilda</b>                                                                                                                                         | Nursing audit: The impact of nursing annotation in the context of hospital gloss                                                             | 2009 | [72] | wrong language                                                       | graph as visualization         |  |
| <b>Finlayson, Samuel G.; LePendu, Paea; Shah, Nigam H.</b>                                                                                                                                                                                                                                 | Building the graph of medicine from millions of clinical narratives                                                                          | 2014 | [73] | term "graph" is used for something different than for patient graphs | no data of individual patients |  |
| <b>Flack, J. R.</b>                                                                                                                                                                                                                                                                        | Seven years experience with a computerized diabetes clinic database                                                                          | 1995 | [74] | term "graph" is used for something different than for patient graphs | graph as visualization         |  |
| <b>Florit, A. M.; Mori, A. R.; Simone, M. de; d'Annunzio, V.; Ricci, F. L.; Lalle, C.</b>                                                                                                                                                                                                  | Context trees: representing co-operative healthcare activities in IREP                                                                       | 1995 | [75] | graph is not associated to an individual patient                     | graph as visualization         |  |
| <b>Folio, Les R.; Machado, Laura B.; Dwyer, Andrew J.</b>                                                                                                                                                                                                                                  | Multimedia-enhanced Radiology Reports: Concept, Components, and Challenges                                                                   | 2018 | [76] | term "graph" is used for something different than for patient graphs | Graph as image                 |  |
| <b>Forister, Julie F. Y.; Sun, Amy; Weissman, Barry A.</b>                                                                                                                                                                                                                                 | Progress report on a post-radial keratotomy patient 20 years after surgery                                                                   | 2007 | [77] | term "graph" is used for something different than for patient graphs | graph as visualization         |  |
| <b>Fors, U. G.; Sandberg, H. C.</b>                                                                                                                                                                                                                                                        | Computer-aided risk management--a software tool for the Hidep model                                                                          | 2001 | [78] | term "graph" is used for something different than for patient graphs | graph as visualization         |  |
| <b>Fracaro, Paolo; Vigo, Markel; Balatsoukas, Panagiotis; van der Veer, Sabine N.; Hassan, Lamiece; Williams, Richard; Wood, Grahame; Sinha, Smeeta; Buchan, Iain; Peek, Niels</b>                                                                                                         | Presentation of laboratory test results in patient portals: influence of interface design on risk interpretation and visual search behaviour | 2018 | [79] | term "graph" is used for something different than for patient graphs | Graph as image                 |  |
| <b>Friesen, Marcia R.; Hamel, Carole; McLeod, Robert D.</b>                                                                                                                                                                                                                                | A mHealth application for chronic wound care: findings of a user trial                                                                       | 2013 | [80] | term "graph" is used for something different than for patient graphs | Graph as image                 |  |
| <b>Gail, Mitchell H.; Costantino, Joseph P.; Pee, David; Bondy, Melissa; Newman, Lisa; Selvan, Mano; Anderson, Garnet L.; Malone, Kathleen E.; Marchbanks, Polly A.; McCaskill-Stevens, Wortia; Norman, Sandra A.; Simon, Michael S.; Spirtas, Robert; Ursin, Giske; Bernstein, Leslie</b> | Projecting individualized absolute invasive breast cancer risk in African American women                                                     | 2007 | [81] | term "graph" is used for something different than for patient graphs | Graph as image                 |  |

|                                                                                                                      |                                                                                                                                                                                      |      |      |                                                                      |                                                 |  |
|----------------------------------------------------------------------------------------------------------------------|--------------------------------------------------------------------------------------------------------------------------------------------------------------------------------------|------|------|----------------------------------------------------------------------|-------------------------------------------------|--|
| <b>Galopin, Alexandre; Bouaud, Jacques; Pereira, Suzanne; Seroussi, Brigitte</b>                                     | Using an ontological modeling to evaluate the consistency of clinical practice guidelines: application to the comparison of three guidelines on the management of adult hypertension | 2014 | [82] | term "graph" is used for something different than for patient graphs | no patient data but medical guidelines modelled |  |
| <b>Galopin, Alexandre; Bouaud, Jacques; Pereira, Suzanne; Seroussi, Brigitte</b>                                     | An Ontology-Based Clinical Decision Support System for the Management of Patients with Multiple Chronic Disorders                                                                    | 2015 | [83] | term "graph" is used for something different than for patient graphs | no patient data but medical guidelines modelled |  |
| <b>Garla, Vijay; Taylor, Caroline; Brandt, Cynthia</b>                                                               | Semi-supervised clinical text classification with Laplacian SVMs: an application to cancer case management                                                                           | 2013 | [84] | term "graph" is used for something different than for patient graphs | No graph theory                                 |  |
| <b>Garrett, William F.; Fuchs, Henry; Whitton, Mary C.; State, Andrei</b>                                            | Real-time Incremental Visualization of Dynamic Ultrasound Volumes Using Parallel BSP Trees                                                                                           | 1996 | [85] | term "graph" is used for something different than for patient graphs | No graph theory mentioned                       |  |
| <b>Gevins, A. S.; Yeager, C. L.; Diamond, S. L.</b>                                                                  | Interactive Analysis and Display of the Electroencephalogram (EEG) in Real Time                                                                                                      | 1974 | [86] | term "graph" is used for something different than for patient graphs | No graph theory but signal processing           |  |
| <b>Gibson, Todd A.; Goldberg, Debra S.</b>                                                                           | Evaluating Theoretical Models of Protein Interaction Network Evolution Without Seed Graphs                                                                                           | 2013 | [87] | term "graph" is used for something different than for patient graphs | no data of individual patients                  |  |
| <b>Glinkowski, Wojciech</b>                                                                                          | Web-Based Support for Fracture Healing Evaluation and Monitoring                                                                                                                     | 2011 | [88] | term "graph" is used for something different than for patient graphs | Graph as image                                  |  |
| <b>Goodwin, Travis; Harabagiu, Sanda</b>                                                                             | Embedding Open-domain Common-sense Knowledge from Text                                                                                                                               | 2016 | [89] | graph is not associated to an individual patient                     | no data of individual patients                  |  |
| <b>Grinspan, Zachary M.; Abramson, Erika L.; Banerjee, Samprit; Kern, Lisa M.; Kaushal, Rainu; Shapiro, Jason S.</b> | Potential value of health information exchange for people with epilepsy: crossover patterns and missing clinical data                                                                | 2013 | [90] | term "graph" is used for something different than for patient graphs | No graph theory mentioned                       |  |
| <b>Gunter, Carl</b>                                                                                                  | Detecting Roles and Anomalies in Hospital Access Audit Logs                                                                                                                          | 2014 | [91] | term "graph" is used for something different than for patient graphs | no data of individual patients but audit logs   |  |
| <b>Guzzi, Pietro Hiram; Mina, Marco</b>                                                                              | Towards the Assessment of Semantic Similarity Analysis of Protein Data: Main Approaches and Issues                                                                                   | 2012 | [92] | term "graph" is used for something different than for patient graphs | no data of individual patients                  |  |
| <b>Hackney, David N.; Knudtson, Eric J.; Rossi, Karen Q.; Krugh, Dave; O'Shaughnessy, Richard W.</b>                 | Management of pregnancies complicated by anti-c isoimmunization                                                                                                                      | 2004 | [93] | term "graph" is used for something different than for patient graphs | graph as visualization                          |  |
| <b>Halachev, Mihail; Shiri, Nematollaah; Thamildurai, Anand</b>                                                      | Exact Match Search in Sequence Data Using Suffix Trees                                                                                                                               | 2005 | [94] | graph is not associated to an individual patient                     | no data of individual patients                  |  |
| <b>Harsola, A.; Thale, S.; Panse, M. S.</b>                                                                          | Low Cost Digital Stethoscope for Heart Sounds                                                                                                                                        | 2011 | [95] | term "graph" is used for something different than for patient graphs | Graph as image                                  |  |



|                                                                                                                                                    |                                                                                                                                                       |      |       |                                                                      |                                                   |  |
|----------------------------------------------------------------------------------------------------------------------------------------------------|-------------------------------------------------------------------------------------------------------------------------------------------------------|------|-------|----------------------------------------------------------------------|---------------------------------------------------|--|
| <b>Hartzler, Andrea L.; Izard, Jason P.; Dalkin, Bruce L.; Mikles, Sean P.; Gore, John L.</b>                                                      | Design and feasibility of integrating personalized PRO dashboards into prostate cancer care                                                           | 2016 | [96]  | term "graph" is used for something different than for patient graphs | graph as visualization                            |  |
| <b>Hausler, R.; Washburn, D.; Rey, P.; Stefanoff, F.</b>                                                                                           | Acquiring otoneurological results by computer. Evaluation after 2 years of experience                                                                 | 1982 | [97]  | term "graph" is used for something different than for patient graphs | French                                            |  |
| <b>Henry, S. B.; Mead, C. N.</b>                                                                                                                   | Nursing classification systems: necessary but not sufficient for representing "what nurses do" for inclusion in computer-based patient record systems | 1997 | [98]  | term "graph" is used for something different than for patient graphs | nursing activities, not patient data              |  |
| <b>Henzinger, Monika Rauch; King, Valerie; Warnow, Tandy</b>                                                                                       | Constructing a Tree from Homeomorphic Subtrees, with Applications to Computational Evolutionary Biology                                               | 1996 | [99]  | term "graph" is used for something different than for patient graphs | no data of individual patients                    |  |
| <b>Herman, Ted; Pemmaraju, Sriram V.; Segre, Alberto M.; Polgreen, Philip M.; Curtis, Donald E.; Fries, Jason; Hlady, Chris; Severson, Monica</b>  | Wireless Applications for Hospital Epidemiology                                                                                                       | 2009 | [100] | term "graph" is used for something different than for patient graphs | No graph theory                                   |  |
| <b>Hettne, Kristina; Soiland-Reyes, Stian; Klyne, Graham; Belhajjame, Khalid; Gamble, Matthew; Bechhofer, Sean; Roos, Marco; Corcho, Oscar</b>     | Workflow Forever: Semantic Web Semantic Models and Tools for Preserving and Digitally Publishing Computational Experiments                            | 2012 | [101] | term "graph" is used for something different than for patient graphs | no data of individual patients but process graphs |  |
| <b>Hofer, Christine; Kiechl, Stefan; Lang, Wilfried</b>                                                                                            | The Austrian Stroke-Unit-Registry                                                                                                                     | 2008 | [102] | term "graph" is used for something different than for patient graphs | graph as visualization                            |  |
| <b>Hoimyr, Hilde; Christensen, Thomas D.; Emmertsen, Kristian; Johnsen, Soren P.; Riis, Anders; Hansen, Ole Kromann; Hjortdal, Vibeke E.</b>       | Surgical repair of coarctation of the aorta: up to 40 years of follow-up                                                                              | 2006 | [103] | term "graph" is used for something different than for patient graphs | graph as visualization                            |  |
| <b>Hripscak, George; Soulakis, Nicholas D.; Li, Li; Morrison, Frances P.; Lai, Albert M.; Friedman, Carol; Calman, Neil S.; Mostashari, Farzad</b> | Syndromic surveillance using ambulatory electronic health records                                                                                     | 2009 | [104] | term "graph" is used for something different than for patient graphs | graph as visualization                            |  |
| <b>Huang, H.; Gong, T.; Ye, N.; Wang, R.; Dou, Y.</b>                                                                                              | Private and Secured Medical Data Transmission and Analysis for Wireless Sensing Healthcare System                                                     | 2017 | [105] | term "graph" is used for something different than for patient graphs | No graph theory mentioned                         |  |
| <b>Huesch, Marco D.; Schetter, Susann; Segel, Joel; Chetlen, Alison</b>                                                                            | Evaluation of the "Angelina Jolie Effect" on Screening Mammography Utilization in an Academic Center                                                  | 2017 | [106] | term "graph" is used for something different than for patient graphs | no data of individual patients                    |  |
| <b>Islam, S. K. Hafizul; Khan, Muhammad Khurram; Li, Xiong</b>                                                                                     | Security Analysis and Improvement of 'a More Secure Anonymous User Authentication Scheme for the Integrated EPR Information System'                   | 2015 | [107] | term "graph" is used for something different than for patient graphs | No graph mentioned                                |  |

|                                                                                                                                                        |                                                                                                                                        |      |       |                                                                      |                                                                      |  |
|--------------------------------------------------------------------------------------------------------------------------------------------------------|----------------------------------------------------------------------------------------------------------------------------------------|------|-------|----------------------------------------------------------------------|----------------------------------------------------------------------|--|
|                                                                                                                                                        | Italian cancer figures, report 2012: Cancer in children and adolescents                                                                | 2013 | [108] | term "graph" is used for something different than for patient graphs | term "graph" is used for something different than for patient graphs |  |
| <b>Jacky, Jonathan P.; Kalet, Ira J.</b>                                                                                                               | An Object-oriented Programming Discipline for Standard Pascal                                                                          | 1987 | [109] | term "graph" is used for something different than for patient graphs | no medical context                                                   |  |
| <b>Jamakovic, Mesud; Baljic, Rusmir</b>                                                                                                                | Significance of copper level in serum and routine laboratory parameters in estimation of outspreading of Hodgkin's Lymphoma            | 2013 | [110] | term "graph" is used for something different than for patient graphs | graph as visualization                                               |  |
| <b>Jamil, Hasan M.; Modica, Giovanni A.; Teran, Maria A.</b>                                                                                           | Towards a Visual Query Interface for Phylogenetic Databases                                                                            | 2001 | [111] | term "graph" is used for something different than for patient graphs | no data of individual patients                                       |  |
| <b>Jamison, Robert N.; Jurcik, Dylan C.; Edwards, Robert R.; Huang, Chuan-Chin; Ross, Edgar L.</b>                                                     | A Pilot Comparison of a Smartphone App With or Without 2-Way Messaging Among Chronic Pain Patients: Who Benefits From a Pain App?      | 2017 | [112] | term "graph" is used for something different than for patient graphs | graph as visualization                                               |  |
| <b>Kawada, T.; Aoki, S.; Suzuki, S.</b>                                                                                                                | Management of personal health examination data for a population by use of a portable computer                                          | 1992 | [113] | term "graph" is used for something different than for patient graphs | graph as visualization                                               |  |
| <b>Kay, Matthew; Choe, Eun Kyoung; Shepherd, Jesse; Greenstein, Benjamin; Watson, Nathaniel; Consolvo, Sunny; Kientz, Julie A.</b>                     | Lullaby: A Capture & Access System for Understanding the Sleep Environment                                                             | 2012 | [114] | term "graph" is used for something different than for patient graphs | graph as visualization                                               |  |
| <b>Kazmierczak, Steven C.; Leen, Todd K.; Erdogmus, Deniz; Carreira-Perpinan, Miguel A.</b>                                                            | Reduction of multi-dimensional laboratory data to a two-dimensional plot: a novel technique for the identification of laboratory error | 2007 | [115] | term "graph" is used for something different than for patient graphs | graph as visualization                                               |  |
| <b>Keenan, Gail M.; Lopez, Karen Dunn; Yao, Yingwei; Sousa, Vanessa E. C.; Stifter, Janet; Febretti, Alessandro; Johnson, Andrew; Wilkie, Diana J.</b> | Toward Meaningful Care Plan Clinical Decision Support: Feasibility and Effects of a Simulated Pilot Study                              | 2017 | [116] | term "graph" is used for something different than for patient graphs | graph as visualization                                               |  |
| <b>Kennedy, I.; Ritter, H.</b>                                                                                                                         | Antenatal records: do they help us? A new record for watching fetal growth                                                             | 1984 | [117] | term "graph" is used for something different than for patient graphs | graph as visualization                                               |  |
| <b>Kennedy, I.; Stephens, B.</b>                                                                                                                       | A novel antenatal record to help midwives                                                                                              | 1979 | [118] | term "graph" is used for something different than for patient graphs | graph as visualization                                               |  |
| <b>Khan, I. A.</b>                                                                                                                                     | Personalized Electronic Health Record System for Monitoring Patients with Chronic Disease                                              | 2013 | [119] | term "graph" is used for something different than for patient graphs | graph as visualization                                               |  |
| <b>Khan, Arijit; Bhowmick, Sourav S.; Bonchi, Francesco</b>                                                                                            | Summarizing Static and Dynamic Big Graphs                                                                                              | 2017 | [120] | graph is not associated to an individual patient                     | no graph representation of data but graph reduction                  |  |

|                                                                                                                                                     |                                                                                                                                                                                        |      |       |                                                                      |                                     |  |
|-----------------------------------------------------------------------------------------------------------------------------------------------------|----------------------------------------------------------------------------------------------------------------------------------------------------------------------------------------|------|-------|----------------------------------------------------------------------|-------------------------------------|--|
| <b>Khan, Arijit; Elnikety, Sameh</b>                                                                                                                | Systems for Big-graphs                                                                                                                                                                 | 2014 | [121] | graph is not associated to an individual patient                     | no data of individual patients      |  |
| <b>Klann, Jeffrey G.; McCoy, Allison B.; Wright, Adam; Wattanasin, Nich; Sittig, Dean F.; Murphy, Shawn N.</b>                                      | Health care transformation through collaboration on open-source informatics projects: integrating a medical applications platform, research data repository, and patient summarization | 2013 | [122] | term "graph" is used for something different than for patient graphs | graph as visualization              |  |
| <b>Klann, Jeffrey G.; Szolovits, Peter; Downs, Stephen M.; Schadow, Gunther</b>                                                                     | Decision support from local data: creating adaptive order menus from past clinician behavior                                                                                           | 2014 | [123] | graph is not associated to an individual patient                     | No graph theory                     |  |
| <b>Kofler, J.; Pesenhofer, R.; Landl, G.; Sommerfeld-Stur, I.; Peham, C.</b>                                                                        | Monitoring of dairy cow claw health status in 15 herds using the computerised documentation program Claw Manager and digital parameters                                                | 2013 | [124] | term "graph" is used for something different than for patient graphs | graph as visualization              |  |
| <b>Kourtis, Georgios; Caiaffa, Maria-Filomena; Forte, Cesarea; Scarlato, Marisa I.; Macchia, Luigi</b>                                              | Retrospective monitoring in the management of persistent asthma                                                                                                                        | 2011 | [125] | term "graph" is used for something different than for patient graphs | graph as visualization              |  |
| <b>Kraus, Stefan; Castellanos, Ixchel; Albermann, Matthias; Schuettler, Christina; Prokosch, Hans-Ulrich; Staudigel, Martin; Toddenroth, Dennis</b> | Using Arden Syntax for the Generation of Intelligent Intensive Care Discharge Letters                                                                                                  | 2016 | [126] | term "graph" is used for something different than for patient graphs | Graph as image                      |  |
| <b>Kushniruk, Andre; Borycki, Elizabeth; Anderson, James G.; Anderson, Marilyn M.</b>                                                               | Combining Two Forms of Simulation to Predict the Potential Impact of Interface Design on Technology-induced Error in Healthcare                                                        | 2008 | [127] | graph is not associated to an individual patient                     | graph as visualization              |  |
| <b>Kwon, Yongjin; Kang, Kyuchang; Bae, Changseok; Chung, Hee-Joon; Kim, Ju Han</b>                                                                  | Lifelog agent for human activity pattern analysis on health avatar platform                                                                                                            | 2014 | [128] | term "graph" is used for something different than for patient graphs | no medical data but activity graphs |  |
| <b>Labarre, Anthony; Verwer, Sicco</b>                                                                                                              | Merging Partially Labelled Trees: Hardness and a Declarative Programming Solution                                                                                                      | 2014 | [129] | graph is not associated to an individual patient                     | no data of individual patients      |  |
| <b>Lancia, Giuseppe; Carr, Robert; Walenz, Brian; Istrail, Sorin</b>                                                                                | 101 Optimal PDB Structure Alignments: A Branch-and-cut Algorithm for the Maximum Contact Map Overlap Problem                                                                           | 2001 | [130] | graph is not associated to an individual patient                     | no data of individual patients      |  |
| <b>Landes, Sara J.; Carlson, Eve B.; Ruzek, Josef I.; Wang, Dan; Hugo, Emily; DeGaetano, Noah; Chambers, Justin G.; Lindley, Steven E.</b>          | Provider-Driven Development of a Measurement Feedback System to Enhance Measurement-Based Care in VA Mental Health                                                                     | 2015 | [131] | term "graph" is used for something different than for patient graphs | graph as visualization              |  |
| <b>Lee, Hee Jun; Kim, Ju Yeong; Kim, Seul Ki; Lee, Jung Ryeol; Suh, Chang Suk; Kim, Seok Hyun</b>                                                   | Learning Curve Analysis and Surgical Outcomes of Single-port Laparoscopic Myomectomy                                                                                                   | 2015 | [132] | term "graph" is used for something different than for patient graphs | graph as visualization              |  |
| <b>Levin, Roger J.</b>                                                                                                                              | Incidence of thyroid cancer in residents surrounding the Three Mile Island nuclear facility                                                                                            | 2008 | [133] | term "graph" is used for something different than for patient graphs | graph as visualization              |  |

|                                                                                                                                                  |                                                                                                                                                                 |      |       |                                                                      |                                                                      |  |
|--------------------------------------------------------------------------------------------------------------------------------------------------|-----------------------------------------------------------------------------------------------------------------------------------------------------------------|------|-------|----------------------------------------------------------------------|----------------------------------------------------------------------|--|
| <b>Lezcano, Leonardo; Sanchez-Alonso, Salvador; Sicilia, Miguel-Angel</b>                                                                        | Associating clinical archetypes through UMLS Metathesaurus term clusters                                                                                        | 2012 | [134] | graph is not associated to an individual patient                     | no data of individual patients                                       |  |
| <b>Liabsuetrakul, Tippawan; Prappre, Tagoon; Pairot, Pakamas; Oumuddee, Nurlisa; Islam, Monir</b>                                                | Development of a web-based epidemiological surveillance system with health system response for improving maternal and newborn health: Field-testing in Thailand | 2017 | [135] | term “graph” is used for something different than for patient graphs | Graph as image                                                       |  |
| <b>Lin, Ying Ling; Guerguerian, Anne-Marie; Tomasi, Jessica; Laussen, Peter; Trbovich, Patricia</b>                                              | Usability of data integration and visualization software for multidisciplinary pediatric intensive care: a human factors approach to assessing technology       | 2017 | [136] | term “graph” is used for something different than for patient graphs | graph as visualization                                               |  |
| <b>Lin, Hsiu-Wen; Wang, Yu-Jen; Jing, Ling-Fang; Chang, Polun</b>                                                                                | Mockup design of personal health diary app for patients with chronic kidney disease                                                                             | 2014 | [137] | term “graph” is used for something different than for patient graphs | graph as visualization                                               |  |
| <b>Liu, Wei; Chung, Bo Chuen; Wang, Rui; Ng, Jonathon; Morlet, Nigel</b>                                                                         | A genetic algorithm enabled ensemble for unsupervised medical term extraction from clinical letters                                                             | 2015 | [138] | graph is not associated to an individual patient                     | term “graph” is used for something different than for patient graphs |  |
| <b>Liu, H.; Dou, D.; Jin, R.; Lependu, P.; Shah, N.</b>                                                                                          | Mining Biomedical Ontologies and Data Using RDF Hypergraphs                                                                                                     | 2013 | [139] | term “graph” is used for something different than for patient graphs | term “graph” is used for something different than for patient graphs |  |
| <b>Liu, Yifeng; Guo, Zhaochen; Ke, Xiaodi; Za’iane, Osmar R.</b>                                                                                 | Protein Subcellular Localization Prediction with Associative Classification and Multi-class SVM                                                                 | 2011 | [140] | term “graph” is used for something different than for patient graphs | term “graph” is used for something different than for patient graphs |  |
| <b>Liu, J. M.; Wu, H. W.; Chen, W. S.; Lin, W. C.; Chao, Y.; Lui, W. Y.; Whang-Peng, J.</b>                                                      | Integration of computer-assembled digital images and text data as evidence for the oncological record                                                           | 2000 | [141] | term “graph” is used for something different than for patient graphs | term “graph” is used for something different than for patient graphs |  |
| <b>Loorak, Mona Hosseinkhani; Perin, Charles; Kamal, Noreen; Hill, Michael; Carpendale, Sheelagh</b>                                             | TimeSpan: Using Visualization to Explore Temporal Multi-dimensional Data of Stroke Patients                                                                     | 2016 | [142] | graph is not associated to an individual patient                     | term “graph” is used for something different than for patient graphs |  |
| <b>Lopez, Karen Dunn; Wilkie, Diana J.; Yao, Yingwei; Sousa, Vanessa; Febretti, Alessandro; Stifter, Janet; Johnson, Andrew; Keenan, Gail M.</b> | Nurses' Numeracy and Graphical Literacy: Informing Studies of Clinical Decision Support Interfaces                                                              | 2016 | [143] | term “graph” is used for something different than for patient graphs | term “graph” is used for something different than for patient graphs |  |
| <b>Lovis, C.; Baud, R. H.; Revillard, C.; Pult, L.; Borst, F.; Geissbuhler, A.</b>                                                               | Paragraph-oriented structure for narratives in medical documentation                                                                                            | 2001 | [144] | term “graph” is used for something different than for patient graphs | term “graph” is used for something different than for patient graphs |  |
| <b>Luo, Yuan; Xin, Yu; Hochberg, Ephraim; Joshi, Rohit; Uzuner, Ozlem; Szolovits, Peter</b>                                                      | Subgraph augmented non-negative tensor factorization (SANTF) for modeling clinical narrative text                                                               | 2015 | [145] | term “graph” is used for something different than for patient graphs | term “graph” is used for something different than for patient graphs |  |
| <b>Luque-Fernandez, Miguel Angel; Zoega, Helga; Valdimarsdottir, Unnur; Williams, Michelle A.</b>                                                | Deconstructing the smoking-preeclampsia paradox through a counterfactual framework                                                                              | 2016 | [146] | term “graph” is used for something different than for patient graphs | term “graph” is used for something different than for patient graphs |  |

|                                                                                                                                                                                               |                                                                                                                                    |      |       |                                                                      |                                                                      |  |
|-----------------------------------------------------------------------------------------------------------------------------------------------------------------------------------------------|------------------------------------------------------------------------------------------------------------------------------------|------|-------|----------------------------------------------------------------------|----------------------------------------------------------------------|--|
| <b>Madkour, M.; Song, Hsing-yi; Du Jingcheng; Tao, C.</b>                                                                                                                                     | A representational analysis of a temporal indeterminacy display in clinical events                                                 | 2016 | [147] | term "graph" is used for something different than for patient graphs | term "graph" is used for something different than for patient graphs |  |
| <b>Mandal, A. K.; Sarkar, A.</b>                                                                                                                                                              | Formal representation of service interactions for SaaS based applications                                                          | 2014 | [148] | term "graph" is used for something different than for patient graphs | term "graph" is used for something different than for patient graphs |  |
| <b>Margusino-Framinan, Luis; Cid-Silva, Purificacion; Mena-de-Cea, Alvaro; Sanclaudio-Luhia, Ana Isabel; Castro-Castro, Jose Antonio; Vazquez-Gonzalez, Guillermo; Martin-Herranz, Isabel</b> | Intelligent MONitoring System for antiviral pharmacotherapy in patients with chronic hepatitis C (SiMON-VC)                        | 2017 | [149] | term "graph" is used for something different than for patient graphs | term "graph" is used for something different than for patient graphs |  |
| <b>Markazi-Moghaddam, Nader; Arab, Mohammad; Ravaghi, Hamid; Rashidian, Arash; Khatibi, Toktam; Zargar Balaye Jame, Sanaz</b>                                                                 | A Knowledge Map for Hospital Performance Concept: Extraction and Analysis: A Narrative Review Article                              | 2016 | [150] | term "graph" is used for something different than for patient graphs | term "graph" is used for something different than for patient graphs |  |
| <b>Martin, Gina S.; Tapsell, Linda C.; Batterham, Marijka J.; Russell, Kenneth G.</b>                                                                                                         | Relative bias in diet history measurements: a quality control technique for dietary intervention trials                            | 2002 | [151] | graph is not associated to an individual patient                     | term "graph" is used for something different than for patient graphs |  |
| <b>Martinez, David; Otegi, Arantxa; Soroa, Aitor; Agirre, Eneko</b>                                                                                                                           | Improving search over Electronic Health Records using UMLS-based query expansion through random walks                              | 2014 | [152] | term "graph" is used for something different than for patient graphs | term "graph" is used for something different than for patient graphs |  |
| <b>Martinez-Costa, Catalina; Schulz, Stefan</b>                                                                                                                                               | Validating EHR clinical models using ontology patterns                                                                             | 2017 | [153] | term "graph" is used for something different than for patient graphs | term "graph" is used for something different than for patient graphs |  |
| <b>Matthews, Suzanne J.</b>                                                                                                                                                                   | Heterogeneous Compression of Large Collections of Evolutionary Trees                                                               | 2015 | [154] | term "graph" is used for something different than for patient graphs | term "graph" is used for something different than for patient graphs |  |
| <b>Mechkour, M.; Mulhem, P.; Fourel, F.; Berrut, E. F. C.</b>                                                                                                                                 | PRIME-GC. A medical information retrieval prototype on the Web                                                                     | 1997 | [155] | term "graph" is used for something different than for patient graphs | term "graph" is used for something different than for patient graphs |  |
| <b>Mendonça, Eneida A.; Johnson, Stephen B.; Seol, Yoon-Ho; Cimino, James J.</b>                                                                                                              | Analyzing the Semantics of Patient Data to Rank Records of Literature Retrieval                                                    | 2002 | [156] | term "graph" is used for something different than for patient graphs | term "graph" is used for something different than for patient graphs |  |
| <b>Meystre, Stephane M.; Lee, Sanghoon; Jung, Chai Young; Chevrier, Raphael D.</b>                                                                                                            | Common data model for natural language processing based on two existing standard information models: CDA+GrAF                      | 2012 | [157] | term "graph" is used for something different than for patient graphs | term "graph" is used for something different than for patient graphs |  |
| <b>Milicchio, Franco; Tradigo, Giuseppe; Veltri, Pierangelo; Prospero, Mattia</b>                                                                                                             | High-performance Data Structures for De Novo Assembly of Genomes: Cache Oblivious Generic Programming                              | 2016 | [158] | term "graph" is used for something different than for patient graphs | term "graph" is used for something different than for patient graphs |  |
| <b>Mirshahi, A.; Kohnen, T.</b>                                                                                                                                                               | Scientific evaluation and quality assurance in refractive surgical interventions. Evaluation of the Datagraph med computer program | 2002 | [159] | term "graph" is used for something different than for patient graphs | term "graph" is used for something different than for patient graphs |  |

|                                                                                                                                     |                                                                                                                                                                               |      |       |                                                                      |                                                                      |
|-------------------------------------------------------------------------------------------------------------------------------------|-------------------------------------------------------------------------------------------------------------------------------------------------------------------------------|------|-------|----------------------------------------------------------------------|----------------------------------------------------------------------|
| <b>Mirzaei, Masoud; Truswell, A. Stewart; Arnett, Kathryn; Page, Andrew; Taylor, Richard; Leeder, Stephen R.</b>                    | Cerebrovascular disease in 48 countries: secular trends in mortality 1950-2005                                                                                                | 2012 | [160] | term "graph" is used for something different than for patient graphs | term "graph" is used for something different than for patient graphs |
| <b>Morin, Patricia; Herrmann, Francois; Ammann, Patrick; Uebelhart, Brigitte; Rizzoli, Rene</b>                                     | A rapid self-administered food frequency questionnaire for the evaluation of dietary protein intake                                                                           | 2005 | [161] | graph is not associated to an individual patient                     | term "graph" is used for something different than for patient graphs |
| <b>Moruzzi, Mauro</b>                                                                                                               | The new culture of dematerialized health                                                                                                                                      | 2014 | [162] | term "graph" is used for something different than for patient graphs | term "graph" is used for something different than for patient graphs |
| <b>Mossel, Elchanan; Roch, Sebastien; Steel, Mike</b>                                                                               | Shrinkage Effect in Ancestral Maximum Likelihood                                                                                                                              | 2009 | [163] | term "graph" is used for something different than for patient graphs | term "graph" is used for something different than for patient graphs |
| <b>Mozhayskiy, Vadim; Miller, Bob; Ma, Kwan-Liu; Tagkopoulos, Ilias</b>                                                             | A Scalable Multi-scale Framework for Parallel Simulation and Visualization of Microbial Evolution                                                                             | 2011 | [164] | graph is not associated to an individual patient                     | graph is not associated to an individual patient                     |
| <b>Muller, R.</b>                                                                                                                   | The CliniCon framework for context representation in electronic patient records                                                                                               | 1997 | [165] | term "graph" is used for something different than for patient graphs | term "graph" is used for something different than for patient graphs |
| <b>Murphy, Cynthia A.; Carstens, Kimberly; Villamayor, Precy</b>                                                                    | Electronic growth charts: watching our patients grow                                                                                                                          | 2005 | [166] | term "graph" is used for something different than for patient graphs | term "graph" is used for something different than for patient graphs |
| <b>Mwaniki, Paul; Ayieko, Philip; Todd, Jim; English, Mike</b>                                                                      | Assessment of paediatric inpatient care during a multifaceted quality improvement intervention in Kenyan district hospitals-- use of prospectively collected case record data | 2014 | [167] | term "graph" is used for something different than for patient graphs | term "graph" is used for something different than for patient graphs |
| <b>Myleus, Anna; Stenlund, Hans; Hernell, Olle; Gothefors, Leif; Hammarstrom, Marie-Louise; Persson, Lars-Ake; Ivarsson, Anneli</b> | Early vaccinations are not risk factors for celiac disease                                                                                                                    | 2012 | [168] | graph is not associated to an individual patient                     | graph is not associated to an individual patient                     |
| <b>Nagar, Anurag; Al-Mubaid, Hisham; Bettayeb, Said</b>                                                                             | Computing Gene Functional Similarity Using Combined Graphs                                                                                                                    | 2012 | [169] | term "graph" is used for something different than for patient graphs | term "graph" is used for something different than for patient graphs |
| <b>Newell, S. D. [JR]; Englert, J.; Box-Taylor, A.; Davis, K. M.; Koch, K. E.</b>                                                   | Clinical efficiency tools improve stroke management in a rural southern health system                                                                                         | 1998 | [170] | graph is not associated to an individual patient                     | term "graph" is used for something different than for patient graphs |
| <b>Ng, Kenney; Ghoting, Amol; Steinhubl, Steven R.; Stewart, Walter F.; Malin, Bradley; Sun, Jimeng</b>                             | PARAMO: a PARAllel predictive MOdeling platform for healthcare analytic research using electronic health records                                                              | 2014 | [171] | graph is not associated to an individual patient                     | term "graph" is used for something different than for patient graphs |
| <b>Nielsen, Finn \AArup</b>                                                                                                         | A Fielded Wiki for Personality Genetics                                                                                                                                       | 2010 | [172] | term "graph" is used for something different than for patient graphs | term "graph" is used for something different than for patient graphs |

|                                                                                                                           |                                                                                                                          |      |       |                                                                      |                                                                      |
|---------------------------------------------------------------------------------------------------------------------------|--------------------------------------------------------------------------------------------------------------------------|------|-------|----------------------------------------------------------------------|----------------------------------------------------------------------|
| <b>Nikfarjam, Azadeh; Emadzadeh, Ehsan; Gonzalez, Graciela</b>                                                            | Towards generating a patient's timeline: extracting temporal relationships from clinical notes                           | 2013 | [173] | term "graph" is used for something different than for patient graphs | term "graph" is used for something different than for patient graphs |
| <b>Nori, Nozomi; Kashima, Hisashi; Yamashita, Kazuto; Ikai, Hiroshi; Imanaka, Yuichi</b>                                  | Simultaneous Modeling of Multiple Diseases for Mortality Prediction in Acute Hospital Care                               | 2015 | [174] | term "graph" is used for something different than for patient graphs | term "graph" is used for something different than for patient graphs |
| <b>Okamoto, K.; Tanaka, H.; Takemura, T.; Kume, N.; Kuroda, T.; Yoshihara, H.</b>                                         | A hypothesis-generating support system using medical records for clinical knowledge acquisition                          | 2012 | [175] | term "graph" is used for something different than for patient graphs | term "graph" is used for something different than for patient graphs |
| <b>Orban, Kristina; Edberg, Anna-Karin; Erlandsson, Lena-Karin</b>                                                        | Using a time-geographical diary method in order to facilitate reflections on changes in patterns of daily occupations    | 2012 | [176] | term "graph" is used for something different than for patient graphs | term "graph" is used for something different than for patient graphs |
| <b>O'Sullivan, E. M.</b>                                                                                                  | International variation in the incidence of oral and pharyngeal cancer                                                   | 2008 | [177] | term "graph" is used for something different than for patient graphs | term "graph" is used for something different than for patient graphs |
| <b>Pabón, M. C.; Montoya, G. A.; Millán, M.</b>                                                                           | Mediation and graph data models for medical data integration                                                             | 2013 | [178] | wrong language                                                       | no Eng                                                               |
| <b>Parkin, D. Max; Ferlay, Jacques; Curado, Maria-Paula; Bray, Freddie; Edwards, Brenda; Shin, Hai-Rim; Forman, David</b> | Fifty years of cancer incidence: CI5 I-IX                                                                                | 2010 | [179] | term "graph" is used for something different than for patient graphs | term "graph" is used for something different than for patient graphs |
| <b>Patil, R.; Karandikar, R. G.</b>                                                                                       | Digital signal preservation approaches of archived biomedical paper records #x2014; A review                             | 2016 | [180] | Dublette                                                             | Dublette                                                             |
| <b>Pawloski, Pamala; Cusick, Dona; Amborn, Lori</b>                                                                       | Development of clinical pharmacy productivity metrics                                                                    | 2012 | [181] | term "graph" is used for something different than for patient graphs | term "graph" is used for something different than for patient graphs |
| <b>Payne, T. H.; Andrews, R. D.; Breeling, J.; Ben Davoren, J.; Smith, R. M.; Volpp, B.</b>                               | Graphing clinical events in the VA Computerized Patient Record System                                                    | 1999 | [182] | term "graph" is used for something different than for patient graphs | term "graph" is used for something different than for patient graphs |
| <b>Pedreschi, Dino</b>                                                                                                    | Social Network Analytics, Data Science Ethics & Privacy-preserving Analytics                                             | 2017 | [183] | term "graph" is used for something different than for patient graphs | term "graph" is used for something different than for patient graphs |
| <b>Penfield, W.</b>                                                                                                       | Physicians take to the field                                                                                             | 1992 | [184] | term "graph" is used for something different than for patient graphs | term "graph" is used for something different than for patient graphs |
| <b>Pfeiffer, Karl P.</b>                                                                                                  | Actual state and perspectives of e-health in Austria and international--an overview                                      | 2011 | [185] | term "graph" is used for something different than for patient graphs | term "graph" is used for something different than for patient graphs |
| <b>Pfundner, Alexander; Schnoeberg, Tobias; Horn, John; Boyce, Richard D.; Samwald, Matthias</b>                          | Utilizing the Wikidata System to Improve the Quality of Medical Content in Wikipedia in Diverse Languages: A Pilot Study | 2015 | [186] | term "graph" is used for something different than for patient graphs | term "graph" is used for something different than for patient graphs |

|                                                                                                     |                                                                                                                                                                   |      |       |                                                                      |                                                                      |
|-----------------------------------------------------------------------------------------------------|-------------------------------------------------------------------------------------------------------------------------------------------------------------------|------|-------|----------------------------------------------------------------------|----------------------------------------------------------------------|
| <b>Poon-Chue, A.; Menendez, L.; Gerstner, M. M.; Colletti, P.; Terk, M.</b>                         | MRI evaluation of post-operative seromas in extremity soft tissue sarcomas                                                                                        | 1999 | [187] | term "graph" is used for something different than for patient graphs | term "graph" is used for something different than for patient graphs |
| <b>Pourriat, J. L.; Huet, B.; Gabry, A. L.; Rolland, C.; Cupa, M.</b>                               | Case summaries in real-time. Accomplishments with a microcomputer                                                                                                 | 1982 | [188] | term "graph" is used for something different than for patient graphs | term "graph" is used for something different than for patient graphs |
| <b>Poursadegh, Mehdi; Poursadegh, Farid; Esmaeili, Majid; Bakhshaei, Mehdi</b>                      | Epidemiological Survey of Sinonasal Malignancy in North-East Iran                                                                                                 | 2015 | [189] | graph is not associated to an individual patient                     | graph is not associated to an individual patient                     |
| <b>Powsner, S. M.; Tufte, E. R.</b>                                                                 | Summarizing clinical psychiatric data                                                                                                                             | 1997 | [190] | term "graph" is used for something different than for patient graphs | term "graph" is used for something different than for patient graphs |
| <b>Preece, Megan H. W.; Hill, Andrew; Horswill, Mark S.; Karamatic, Rozemary; Watson, Marcus O.</b> | Designing observation charts to optimize the detection of patient deterioration: reliance on the subjective preferences of healthcare professionals is not enough | 2012 | [191] | term "graph" is used for something different than for patient graphs | term "graph" is used for something different than for patient graphs |
| <b>Pryor, Julie</b>                                                                                 | A snapshot of rehabilitation referrals in rural New South Wales                                                                                                   | 2010 | [192] | term "graph" is used for something different than for patient graphs | term "graph" is used for something different than for patient graphs |
| <b>Rajagopalan, M. R.; Vellaipandian, S.</b>                                                        | Big data framework for national E-governance plan                                                                                                                 | 2013 | [193] | term "graph" is used for something different than for patient graphs | term "graph" is used for something different than for patient graphs |
| <b>Rakic, N.</b>                                                                                    | Acute sensorineural hearing loss at the Otorhinolaryngology Department of the General Hospital in Subotica 1991-1996                                              | 1999 | [194] | graph is not associated to an individual patient                     | term "graph" is used for something different than for patient graphs |
| <b>RAMAYYA, G. P.</b>                                                                               | AXAUDIT - ANESTHETIC AUDIT SYSTEM                                                                                                                                 | 1992 | [195] | term "graph" is used for something different than for patient graphs | term "graph" is used for something different than for patient graphs |
| <b>Rassinoux, A. M.; Michel, P. A.; Wagner, J.; Baud, R.</b>                                        | Current trends with natural language processing                                                                                                                   | 1995 | [196] | term "graph" is used for something different than for patient graphs | term "graph" is used for something different than for patient graphs |
| <b>Ratib, O.</b>                                                                                    | From multimodality digital imaging to multimedia patient record                                                                                                   | 1994 | [197] | wrong language                                                       | term "graph" is used for something different than for patient graphs |
| <b>Reiz, Beata; Csato, Lehel</b>                                                                    | Bayesian Network Classifier for Medical Data Analysis                                                                                                             | 2009 | [198] | term "graph" is used for something different than for patient graphs | term "graph" is used for something different than for patient graphs |
| <b>Rhea, Sarah; Weber, David J.; Poole, Charles; Cairns, Charles</b>                                | Risk factors for hospitalization after dog bite injury: a case-cohort study of emergency department visits                                                        | 2014 | [199] | term "graph" is used for something different than for patient graphs | term "graph" is used for something different than for patient graphs |
| <b>Rizvi, Syed Zain R.; Fong, Philip W.L.</b>                                                       | Interoperability of Relationship- and Role-Based Access Control                                                                                                   | 2016 | [200] | term "graph" is used for something different than for patient graphs | term "graph" is used for something different than for patient graphs |



|                                                                                                                                                                                                                                                                                    |                                                                                                                                              |      |       |                                                                      |                                                                      |  |
|------------------------------------------------------------------------------------------------------------------------------------------------------------------------------------------------------------------------------------------------------------------------------------|----------------------------------------------------------------------------------------------------------------------------------------------|------|-------|----------------------------------------------------------------------|----------------------------------------------------------------------|--|
| <b>Rizvi, Syed Zain R.; Fong, Philip W.L.; Crampton, Jason; Sellwood, James</b>                                                                                                                                                                                                    | Relationship-Based Access Control for an Open-Source Medical Records System                                                                  | 2015 | [201] | term "graph" is used for something different than for patient graphs | term "graph" is used for something different than for patient graphs |  |
| <b>Rocha, J.</b>                                                                                                                                                                                                                                                                   | Graph Comparison by Log-Odds Score Matrices with Application to Protein Topology Analysis                                                    | 2011 | [202] | term "graph" is used for something different than for patient graphs | term "graph" is used for something different than for patient graphs |  |
| <b>Ruiz, Jorge G.; Andrade, Allen D.; Hogue, Christie; Karanam, Chandana; Akkineni, Sisir; Cevallos, David; Anam, Ramanakumar; Sharit, Joseph</b>                                                                                                                                  | The Association of Graph Literacy With Use of and Skills Using an Online Personal Health Record in Outpatient Veterans                       | 2016 | [203] | graph is not associated to an individual patient                     | graph is not associated to an individual patient                     |  |
| <b>Ryu, Ini; Siio, Itiro</b>                                                                                                                                                                                                                                                       | TongueDx: A Tongue Diagnosis for Health Care on Smartphones                                                                                  | 2014 | [204] | graph is not associated to an individual patient                     | term "graph" is used for something different than for patient graphs |  |
| <b>Salinas, Oscar; Cosio, Gerardo de; Clavel-Arcas, Carme; Montoya, Jeannette; Serpas, Mario; Moran de Garcia, Silvia; Concha-Eastman, Alberto</b>                                                                                                                                 | An information system for injuries from external causes (SILEX): a successful project in El Salvador                                         | 2008 | [205] | term "graph" is used for something different than for patient graphs | term "graph" is used for something different than for patient graphs |  |
| <b>Sauleau, Erik A.; Paumier, Jean-Philippe; Buemi, Antoine</b>                                                                                                                                                                                                                    | Medical record linkage in health information systems by approximate string matching and clustering                                           | 2005 | [206] | graph is not associated to an individual patient                     | term "graph" is used for something different than for patient graphs |  |
| <b>Schenk, Robert J. [JR]; Schenk, Jenna</b>                                                                                                                                                                                                                                       | Integration of remote blood glucose meter upload technology into a clinical pharmacist medication therapy management service                 | 2011 | [207] | term "graph" is used for something different than for patient graphs | term "graph" is used for something different than for patient graphs |  |
| <b>Schultz, S. E.; Rothwell, D. M.; Chen, Z.; Tu, K.</b>                                                                                                                                                                                                                           | Identifying cases of congestive heart failure from administrative data: a validation study using primary care patient records                | 2013 | [208] | Dublette                                                             | Dublette                                                             |  |
| <b>Schultz, S. E.; Rothwell, D. M.; Chen, Z.; Tu, K.</b>                                                                                                                                                                                                                           | Identifying cases of congestive heart failure from administrative data: a validation study using primary care patient records                | 2013 | [209] | term "graph" is used for something different than for patient graphs | term "graph" is used for something different than for patient graphs |  |
| <b>Sevick, Mary Ann; Zickmund, Susan; Korytkowski, Mary; Piraino, Beth; Sereika, Susan; Mihalko, Shannon; Snetselaar, Linda; Stumbo, Phyllis; Hausmann, Leslie; Ren, Dianxu; Marsh, Rita; Sakraida, Teresa; Gibson, Jolynn; Safaien, Mehry; Starrett, Terry J.; Burke, Lora E.</b> | Design, feasibility, and acceptability of an intervention using personal digital assistant-based self-monitoring in managing type 2 diabetes | 2008 | [210] | term "graph" is used for something different than for patient graphs | term "graph" is used for something different than for patient graphs |  |
| <b>Sharit, Joseph; Lisigurski, Miriam; Andrade, Allen D.; Karanam, Chandana; Nazi, Kim M.; Lewis, James R.; Ruiz, Jorge G.</b>                                                                                                                                                     | The Roles of Health Literacy, Numeracy, and Graph Literacy on the Usability of the VA's Personal Health Record by Veterans                   | 2014 | [211] | term "graph" is used for something different than for patient graphs | term "graph" is used for something different than for patient graphs |  |
| <b>Shaverdian, Anna A.; Zhou, Hao; Michailidis, George; Jagadish, H. V.</b>                                                                                                                                                                                                        | Algebraic Visual Analysis: The Catalano Phone Call Data Set Case Study                                                                       | 2009 | [212] | graph is not associated to an individual patient                     | graph is not associated to an individual patient                     |  |

|                                                                                                                                                                        |                                                                                                                                                                                                   |      |       |                                                                      |                                                                      |  |
|------------------------------------------------------------------------------------------------------------------------------------------------------------------------|---------------------------------------------------------------------------------------------------------------------------------------------------------------------------------------------------|------|-------|----------------------------------------------------------------------|----------------------------------------------------------------------|--|
| <b>Shaw, Julie L. V.; Cohen, Ashley; Konforte, Danijela; Binesh-Marvasti, Tina; Colantonio, David A.; Adeli, Khosrow</b>                                               | Validity of establishing pediatric reference intervals based on hospital patient data: a comparison of the modified Hoffmann approach to CALIPER reference intervals obtained in healthy children | 2014 | [213] | graph is not associated to an individual patient                     | term "graph" is used for something different than for patient graphs |  |
| <b>Sheridan, Joanna; Chamberlain, Kerry; Dupuis, Ann</b>                                                                                                               | Timelining: visualizing experience                                                                                                                                                                | 2011 | [214] | term "graph" is used for something different than for patient graphs | term "graph" is used for something different than for patient graphs |  |
| <b>Shibuya, Tetsuo</b>                                                                                                                                                 | Geometric Suffix Tree: Indexing Protein 3-D Structures                                                                                                                                            | 2010 | [215] | term "graph" is used for something different than for patient graphs | term "graph" is used for something different than for patient graphs |  |
| <b>Shigli, Heenakousar; Tejas, M. H.; Narayan, Lohit; Desai, Shrinivas D.</b>                                                                                          | User Intervention Based Segmentation of Myocardium In Cardiac Cine MRI Images                                                                                                                     | 2015 | [216] | term "graph" is used for something different than for patient graphs | term "graph" is used for something different than for patient graphs |  |
| <b>Shim, S-H; Kim, D-Y; Lee, D-Y; Lee, S-W; Park, J-Y; Lee, J. J.; Kim, J-H; Kim, Y-M; Kim, Y-T; Nam, J-H</b>                                                          | Metabolic tumour volume and total lesion glycolysis, measured using preoperative 18F-FDG PET/CT, predict the recurrence of endometrial cancer                                                     | 2014 | [217] | term "graph" is used for something different than for patient graphs | term "graph" is used for something different than for patient graphs |  |
| <b>Sills, Marion R.; Kwan, Bethany M.; Yawn, Barbara P.; Sauer, Brian C.; Fairclough, Diane L.; Federico, Monica J.; Juarez-Colunga, Elizabeth; Schilling, Lisa M.</b> | Medical home characteristics and asthma control: a prospective, observational cohort study protocol                                                                                               | 2013 | [218] | term "graph" is used for something different than for patient graphs | term "graph" is used for something different than for patient graphs |  |
| <b>Sim, Livvi Li Wei; Ban, Kenneth Hon Kim; Tan, Tin Wee; Sethi, Sunil Kumar; Loh, Tze Ping</b>                                                                        | Development of a clinical decision support system for diabetes care: A pilot study                                                                                                                | 2017 | [219] | term "graph" is used for something different than for patient graphs | term "graph" is used for something different than for patient graphs |  |
| <b>Sittig, Dean F.; Murphy, Daniel R.; Smith, Michael W.; Russo, Elise; Wright, Adam; Singh, Hardeep</b>                                                               | Graphical display of diagnostic test results in electronic health records: a comparison of 8 systems                                                                                              | 2015 | [220] | term "graph" is used for something different than for patient graphs | term "graph" is used for something different than for patient graphs |  |
| <b>SMART, J. F.; ROUX, M.</b>                                                                                                                                          | A MODEL FOR MEDICAL KNOWLEDGE REPRESENTATION APPLICATION TO THE ANALYSIS OF DESCRIPTIVE PATHOLOGY REPORTS                                                                                         | 1995 | [221] | term "graph" is used for something different than for patient graphs | term "graph" is used for something different than for patient graphs |  |
| <b>Sobo, E. J.; Andriese, S.; Stroup, C.; Morgan, D.; Kurtin, P.</b>                                                                                                   | Developing indicators for emergency medical services (EMS) system evaluation and quality improvement: a statewide demonstration and planning project                                              | 2001 | [222] | term "graph" is used for something different than for patient graphs | term "graph" is used for something different than for patient graphs |  |
| <b>Soldes, O. S.; Younger, J. G.; Hirschl, R. B.</b>                                                                                                                   | Predictors of malignancy in childhood peripheral lymphadenopathy                                                                                                                                  | 1999 | [223] | term "graph" is used for something different than for patient graphs | term "graph" is used for something different than for patient graphs |  |
| <b>Sondhi, Parikshit; Sun, Jimeng; Tong, Hanghang; Zhai, ChengXiang</b>                                                                                                | SympGraph: A Framework for Mining Clinical Notes Through Symptom Relation Graphs                                                                                                                  | 2012 | [224] | term "graph" is used for something different than for patient graphs | term "graph" is used for something different than for patient graphs |  |

|                                                                                                       |                                                                                                                                       |      |       |                                                                      |                                                                      |  |
|-------------------------------------------------------------------------------------------------------|---------------------------------------------------------------------------------------------------------------------------------------|------|-------|----------------------------------------------------------------------|----------------------------------------------------------------------|--|
| <b>Sovik, Signe; Skaga, Nils Oddvar; Hanoa, Rolf; Eken, Torsten</b>                                   | Sudden survival improvement in critical neurotrauma: An exploratory analysis using a stratified statistical process control technique | 2014 | [225] | graph is not associated to an individual patient                     | term "graph" is used for something different than for patient graphs |  |
| <b>Sridhar, Srinath; Dhamdhere, Kedar; Blleloch, Guy; Halperin, Eran; Ravi, R.; Schwartz, Russell</b> | Algorithms for Efficient Near-Perfect Phylogenetic Tree Reconstruction in Theory and Practice                                         | 2007 | [226] | term "graph" is used for something different than for patient graphs | term "graph" is used for something different than for patient graphs |  |
| <b>Stefansson, C. G.</b>                                                                              | Map analyses of psychiatric services. The application of a computerized psychiatric case register to geographical analysis            | 1984 | [227] | term "graph" is used for something different than for patient graphs | term "graph" is used for something different than for patient graphs |  |
| <b>Stevens, V. J.; Rossner, J.; Greenlick, M.; Stevens, N.; Frankel, H. M.; Craddick, S.</b>          | Freedom from fat: a contemporary multi-component weight loss program for the general population of obese adults                       | 1989 | [228] | term "graph" is used for something different than for patient graphs | term "graph" is used for something different than for patient graphs |  |
| <b>Sumner, W. 2nd; Truszczynski, M.; Marek, V. W.</b>                                                 | A formal model of family medicine                                                                                                     | 1996 | [229] | term "graph" is used for something different than for patient graphs | term "graph" is used for something different than for patient graphs |  |
| <b>Sun, Kai; Goncalves, Joana P.; Larminie, Chris; Przulj, Natasa</b>                                 | Predicting disease associations via biological network analysis                                                                       | 2014 | [230] | term "graph" is used for something different than for patient graphs | term "graph" is used for something different than for patient graphs |  |
| <b>Swartz, Susan H.; Cowan, Timothy M.; DePue, Judy; Goldstein, Michael G.</b>                        | Academic profiling of tobacco-related performance measures in primary care                                                            | 2002 | [231] | term "graph" is used for something different than for patient graphs | term "graph" is used for something different than for patient graphs |  |
| <b>Syalim, Amril; Nishide, Takashi; Sakurai, Kouichi</b>                                              | Securing Provenance of Distributed Processes in an Untrusted Environment                                                              | 2012 | [232] | term "graph" is used for something different than for patient graphs | term "graph" is used for something different than for patient graphs |  |
| <b>Szeto, Lap Keung; Liew, Alan Wee-Chung; Yan, Hong; Tang, Sy-sen</b>                                | Gene Expression Data Clustering and Visualization Based on a Binary Hierarchical Clustering Framework                                 | 2003 | [233] | term "graph" is used for something different than for patient graphs | term "graph" is used for something different than for patient graphs |  |
| <b>Taffe, John; Dennerstein, Lorraine</b>                                                             | Menstrual diary data and menopausal transition: methodologic issues                                                                   | 2002 | [234] | term "graph" is used for something different than for patient graphs | term "graph" is used for something different than for patient graphs |  |
| <b>Techentin, R.; Foti, D.; Li, P.; Daniel, E.; Gilbert, B.; Holmes, D.; Al-Saffar, S.</b>            | Development of a Semi-synthetic Dataset as a Testbed for Big-Data Semantic Analytics                                                  | 2014 | [235] | term "graph" is used for something different than for patient graphs | term "graph" is used for something different than for patient graphs |  |
| <b>Tezcan, B.; Khazaezadeh, N.; Ash, A.; Oteng-Ntim, E.</b>                                           | Social disparity and intrauterine death: from politics to policies                                                                    | 2011 | [236] | term "graph" is used for something different than for patient graphs | term "graph" is used for something different than for patient graphs |  |
| <b>Tiikkaja, Sanna; Sandin, Sven; Hultman, Christina M.; Modin, Bitte; Malki, Ninoa; Sparen, Par</b>  | Psychiatric disorder and work life: A longitudinal study of intra-generational social mobility                                        | 2016 | [237] | graph is not associated to an individual patient                     | term "graph" is used for something different than for patient graphs |  |
| <b>Toner, James P.; Coddington, Charles C.; Doody, Kevin; van Voorhis, Brad; Seifer,</b>              | Society for Assisted Reproductive Technology and assisted reproductive                                                                | 2016 | [238] | graph is not associated to an individual patient                     | term "graph" is used for something different than for patient graphs |  |

|                                                                                                                   |                                                                                                                                                 |      |       |                                                                      |                                                                      |  |
|-------------------------------------------------------------------------------------------------------------------|-------------------------------------------------------------------------------------------------------------------------------------------------|------|-------|----------------------------------------------------------------------|----------------------------------------------------------------------|--|
| <b>David B.; Ball, G. David; Luke, Barbara; Wantman, Ethan</b>                                                    | technology in the United States: a 2016 update                                                                                                  |      |       |                                                                      |                                                                      |  |
| <b>Torkar, Simon; Benedik, Peter; Rajkovic, Uros; Sustersic, Olga; Rajkovic, Vladislav</b>                        | Design of a Recommendation System for Adding Support in the Treatment of Chronic Patients                                                       | 2016 | [239] | term "graph" is used for something different than for patient graphs | term "graph" is used for something different than for patient graphs |  |
| <b>Troszynski, Michal; Niemiec, Tomasz; Wilczynska, Anna</b>                                                      | Assessment of three-level selective perinatal care based on the analysis of early perinatal death rates and cesarean sections in Poland in 2008 | 2009 | [240] | term "graph" is used for something different than for patient graphs | term "graph" is used for something different than for patient graphs |  |
| <b>Truyen Tran; Dinh Phung; Luo, Wei; Venkatesh, Svetha</b>                                                       | Stabilized sparse ordinal regression for medical risk stratification                                                                            | 2015 | [241] | term "graph" is used for something different than for patient graphs | term "graph" is used for something different than for patient graphs |  |
| <b>Tukiendorf, A.</b>                                                                                             | Cervix uteri cancer incidence in relation to ethnic situation in Opole province, Poland                                                         | 2002 | [242] | term "graph" is used for something different than for patient graphs | term "graph" is used for something different than for patient graphs |  |
| <b>Ugon, Adrien; Philippe, Carole; Pietrasz, Slawomir; Ganascia, Jean-Gabriel; Levy, Pierre P.</b>                | OPTISAS a new method to analyse patients with Sleep Apnea Syndrome                                                                              | 2008 | [243] | term "graph" is used for something different than for patient graphs | term "graph" is used for something different than for patient graphs |  |
| <b>Valko, Michal; Kveton, Branislav; Valizadegan, Hamed; Cooper, Gregory F.; Hauskrecht, Milos</b>                | Conditional Anomaly Detection with Soft Harmonic Functions                                                                                      | 2011 | [244] | term "graph" is used for something different than for patient graphs | term "graph" is used for something different than for patient graphs |  |
| <b>Vallejo, I. L.; Herrero, H. H.; Sanz, J. J.C.; Martin, J. J.D.; Azarola, E. N.</b>                             | Diagnostic variability in a cohort of patients with multiple admissions in the last two decades                                                 | 2003 | [245] | term "graph" is used for something different than for patient graphs | term "graph" is used for something different than for patient graphs |  |
| <b>Vani, S. N.</b>                                                                                                | Appropriate technologies for mother and child health care in developing countries                                                               | 1989 | [246] | graph is not associated to an individual patient                     | term "graph" is used for something different than for patient graphs |  |
| <b>Vilares, M.; Ribadas, F. J.; Graña, J.</b>                                                                     | Approximately Common Patterns in Shared-forests                                                                                                 | 2001 | [247] | term "graph" is used for something different than for patient graphs | term "graph" is used for something different than for patient graphs |  |
| <b>Voskoboinik, A.; Gutman, M. J.; Croagh, D.; Bell, R.; Saunder, A.; Gribbin, J.; Kanellis, J.</b>               | Implementation and learning of laproscopic donor nephrectomy by a non-transplant general surgeon with advanced laparoscopic skills              | 2011 | [248] | term "graph" is used for something different than for patient graphs | term "graph" is used for something different than for patient graphs |  |
| <b>Vossler, D. G.; Am Haltiner; Schepp, S. K.; Friel, P. A.; Caylor, L. M.; Morgan, J. D.; Doherty, M. J.</b>     | Ictal stuttering - A sign suggestive of psychogenic nonepileptic seizures                                                                       | 2004 | [249] | term "graph" is used for something different than for patient graphs | term "graph" is used for something different than for patient graphs |  |
| <b>Vossler, D. G.; Haltiner, A. M.; Schepp, S. K.; Friel, P. A.; Caylor, L. M.; Morgan, J. D.; Doherty, M. J.</b> | Ictal stuttering: a sign suggestive of psychogenic nonepileptic seizures                                                                        | 2004 | [250] | Dublette                                                             | Dublette                                                             |  |
| <b>Vranken, R.; Coulombier, D.; Kenyon, T.; Koosimile, B.; Mavunga, T.; Coggin, W.; Binkin, N.</b>                | Use of a computerized tuberculosis register for automated generation of case finding,                                                           | 2002 | [251] | term "graph" is used for something different than for patient graphs | term "graph" is used for something different than for patient graphs |  |

|                                                                                                                                            |                                                                                                                         |      |       |                                                                      |                                                                       |  |
|--------------------------------------------------------------------------------------------------------------------------------------------|-------------------------------------------------------------------------------------------------------------------------|------|-------|----------------------------------------------------------------------|-----------------------------------------------------------------------|--|
|                                                                                                                                            | sputum conversion, and treatment outcome reports                                                                        |      |       |                                                                      |                                                                       |  |
| <b>Walley, J. D.; McDonald, M.</b>                                                                                                         | Integration of mother and child health services in Ethiopia                                                             | 1991 | [252] | term "graph" is used for something different than for patient graphs | term "graph" is used for something different than for patient graphs  |  |
| <b>Wang, Zheng; Chakraborty, Prithwish; Mekaru, Sumiko R.; Brownstein, John S.; Ye, Jieping; Ramakrishnan, Naren</b>                       | Dynamic Poisson Autoregression for Influenza-Like-Illness Case Count Prediction                                         | 2015 | [253] | term "graph" is used for something different than for patient graphs | term "graph" is used for something different than for patient graphs  |  |
| <b>Wang, Jason Tsong-Li; Chirn, Gung-Wei; Marr, Thomas G.; Shapiro, Bruce; Shasha, Dennis; Zhang, Kaizhong</b>                             | Combinatorial Pattern Discovery for Scientific Data: Some Preliminary Results                                           | 1994 | [254] | term "graph" is used for something different than for patient graphs | term "graph" is used for something different than for patient graphs  |  |
| <b>Wang, Jason Tsong-Li; Chirn, Gung-Wei; Marr, Thomas G.; Shapiro, Bruce; Shasha, Dennis; Zhang, Kaizhong</b>                             | Combinatorial Pattern Discovery for Scientific Data: Some Preliminary Results                                           | 1994 | [255] | Dublette                                                             | From multimodality digital imaging to multimedia patient record/ dupl |  |
| <b>Wang, Biing-Feng; Lin, Chien-Hsin; Yang, I-Tse</b>                                                                                      | Constructing a Gene Team Tree in Almost $O(N \lg N)$ Time                                                               | 2014 | [256] | term "graph" is used for something different than for patient graphs | term "graph" is used for something different than for patient graphs  |  |
| <b>Wang, X.; Wang, F.; Wang, J.; Qian, B.; Hu, J.</b>                                                                                      | Exploring Patient Risk Groups with Incomplete Knowledge                                                                 | 2013 | [257] | graph is not associated to an individual patient                     | graph is not associated to an individual patient                      |  |
| <b>Welch, Janet L.; Siek, Katie A.; Connelly, Kay H.; Astroth, Kim S.; McManus, M. Sue; Scott, Linda; Heo, Seongkum; Kraus, Michael A.</b> | Merging health literacy with computer technology: self-managing diet and fluid intake among adult hemodialysis patients | 2010 | [258] | term "graph" is used for something different than for patient graphs | term "graph" is used for something different than for patient graphs  |  |
| <b>White, D.; Choi, H.; Peloquin, C.; Zhu, Y.; Zhang, Y.</b>                                                                               | Secular trend of adhesive capsulitis                                                                                    | 2011 | [259] | term "graph" is used for something different than for patient graphs | term "graph" is used for something different than for patient graphs  |  |
| <b>Wilhelms, Jane; van Gelder, Allen</b>                                                                                                   | Octrees for Faster Isosurface Generation                                                                                | 1992 | [260] | term "graph" is used for something different than for patient graphs | term "graph" is used for something different than for patient graphs  |  |
| <b>Winter, Alfred; Brigl, Birgit; Funkat, Gert; Haeber, Anke; Heller, Oliver; Wendt, Thomas</b>                                            | 3LGM(2)-Modeling to support management of health information systems                                                    | 2007 | [261] | term "graph" is used for something different than for patient graphs | term "graph" is used for something different than for patient graphs  |  |
| <b>Wongsuphasawat, Krist; Gotz, David</b>                                                                                                  | Exploring Flow, Factors, and Outcomes of Temporal Event Sequences with the Outflow Visualization                        | 2012 | [262] | term "graph" is used for something different than for patient graphs | term "graph" is used for something different than for patient graphs  |  |
| <b>Wu, Taoyang; Moulton, Vincent; Steel, Mike</b>                                                                                          | Refining Phylogenetic Trees Given Additional Data: An Algorithm Based on Parsimony                                      | 2009 | [263] | term "graph" is used for something different than for patient graphs | term "graph" is used for something different than for patient graphs  |  |
| <b>WU, Yubao; Zhu, Xiaofeng; Li, Li; Fan, Wei; Jin, Ruoming; Zhang, Xiang</b>                                                              | Mining Dual Networks: Models, Algorithms, and Applications                                                              | 2016 | [264] | term "graph" is used for something different than for patient graphs | term "graph" is used for something different than for patient graphs  |  |

|                                                                                                         |                                                                                                                                                          |      |       |                                                                      |                                                                      |
|---------------------------------------------------------------------------------------------------------|----------------------------------------------------------------------------------------------------------------------------------------------------------|------|-------|----------------------------------------------------------------------|----------------------------------------------------------------------|
| <b>Xie, W.; Wu, J.</b>                                                                                  | Mining positive and negative weighted association rules in medical records without user-specified weights based on HITS model                            | 2010 | [265] | term "graph" is used for something different than for patient graphs | term "graph" is used for something different than for patient graphs |
| <b>Xie, C.; Yang, P.; Yang, Y.</b>                                                                      | Open Knowledge Accessing Method in IoT-based Hospital Information System for Medical Record Enrichment                                                   | 2018 | [266] | term "graph" is used for something different than for patient graphs | term "graph" is used for something different than for patient graphs |
| <b>Yamin, A.; Khan, S. A.; Yasin, U. U.</b>                                                             | Automated system of hess screen for diagnosis of paralytic strabismus using computer aided diagnosis                                                     | 2013 | [267] | term "graph" is used for something different than for patient graphs | term "graph" is used for something different than for patient graphs |
| <b>Yoon, Sunmoo; Cohen, Bevin; Cato, Kenrick D.; Liu, Jianfang; Larson, Elaine L.</b>                   | Visualization of Data Regarding Infections Using Eye Tracking Techniques                                                                                 | 2016 | [268] | term "graph" is used for something different than for patient graphs | term "graph" is used for something different than for patient graphs |
| <b>Yoon, Dukyong; Park, Inwhee; Schuemie, Martijn J.; Park, Man Young; Kim, Ju Han; Park, Rae Woong</b> | A quantitative method for assessment of prescribing patterns using electronic health records                                                             | 2013 | [269] | term "graph" is used for something different than for patient graphs | term "graph" is used for something different than for patient graphs |
| <b>Zamora, M.; Baradad, M.; Amado, E.; Cordero, S.; Limón, E.; Ribera, J.; Arias, M.; Gavaldà, R.</b>   | Characterizing chronic disease and polymedication prescription patterns from electronic health records                                                   | 2015 | [270] | term "graph" is used for something different than for patient graphs | term "graph" is used for something different than for patient graphs |
| <b>Zenios, S.</b>                                                                                       | Information Technology in Health Care Systems: Barriers to Adoption                                                                                      | 2006 | [271] | term "graph" is used for something different than for patient graphs | term "graph" is used for something different than for patient graphs |
| <b>Zhang, He; Mehotra, Sanjay; Liebovitz, David; Gunter, Carl A.; Malin, Bradley</b>                    | Mining Deviations from Patient Care Pathways via Electronic Medical Record System Audits                                                                 | 2013 | [272] | term "graph" is used for something different than for patient graphs | term "graph" is used for something different than for patient graphs |
| <b>Zhang, Ming; Zhang, Hong; Tjandra, D.; Wong, S. T. C.</b>                                            | DBMap: a space-conscious data visualization and knowledge discovery framework for biomedical data warehouse                                              | 2004 | [273] | term "graph" is used for something different than for patient graphs | term "graph" is used for something different than for patient graphs |
| <b>Zhao, Sendong</b>                                                                                    | Mining Medical Causality for Diagnosis Assistance                                                                                                        | 2017 | [274] | term "graph" is used for something different than for patient graphs | term "graph" is used for something different than for patient graphs |
| <b>Zheng, Ziwei; Wan, Xiaojun</b>                                                                       | Graph-Based Multi-Modality Learning for Clinical Decision Support                                                                                        | 2016 | [275] | term "graph" is used for something different than for patient graphs | term "graph" is used for something different than for patient graphs |
| <b>Zirkind, Givon</b>                                                                                   | Genetic Database Optimization: How Data Inspection and Consideration, Provides for Index Compression and Record Access Optimization of Genetic Databases | 2006 | [276] | term "graph" is used for something different than for patient graphs | term "graph" is used for something different than for patient graphs |
| <b>ZWEIGENBAUM, P.</b>                                                                                  | MENELAS - AN ACCESS SYSTEM FOR MEDICAL RECORDS USING NATURAL-LANGUAGE                                                                                    | 1994 | [277] | term "graph" is used for something different than for patient graphs | term "graph" is used for something different than for patient graphs |

|                                                                                                                                 |                                                                                                   |      |       |                                                                      |  |                                                                      |
|---------------------------------------------------------------------------------------------------------------------------------|---------------------------------------------------------------------------------------------------|------|-------|----------------------------------------------------------------------|--|----------------------------------------------------------------------|
| <b>Albarakati, N.; Obradovic, Z.</b>                                                                                            | Disease-Based Clustering of Hospital Admission: Disease Network of Hospital Networks Approach     | 2017 | [278] | graph is not associated to an individual patient                     |  | term "graph" is used for something different than for patient graphs |
| <b>Andersen, A.</b>                                                                                                             | An implementation of secure multi-party computations to preserve privacy when processing EMR data | 2013 | [279] | term "graph" is used for something different than for patient graphs |  | term "graph" is used for something different than for patient graphs |
| <b>Andersen, Anders</b>                                                                                                         | SNOOP: Privacy Preserving Middleware for Secure Multi-party Computations                          | 2014 | [280] | term "graph" is used for something different than for patient graphs |  | term "graph" is used for something different than for patient graphs |
| <b>Andersen, A.; Yigzaw, K. Y.; Karlsen, R.</b>                                                                                 | Privacy preserving health data processing                                                         | 2014 | [281] | term "graph" is used for something different than for patient graphs |  | term "graph" is used for something different than for patient graphs |
| <b>Brunson, Jason Cory; Laubenbacher, Reinhard C.</b>                                                                           | Applications of network analysis to routinely collected health care data: a systematic review     | 2018 | [282] | term "graph" is used for something different than for patient graphs |  | term "graph" is used for something different than for patient graphs |
| <b>Chen, Jinpeng; Poon, Josiah; Poon, Simon K.; Xu, Ling; Sze, Daniel M. Y.</b>                                                 | Mining Symptom-Herb Patterns from Patient Records Using Tripartite Graph                          | 2015 | [283] | graph is not associated to an individual patient                     |  | graph is not associated to an individual patient                     |
| <b>Finney, John M.; Walker, A. Sarah; Peto, Tim E. A.; Wyllie, David H.</b>                                                     | An efficient record linkage scheme using graphical analysis for identifier error detection        | 2011 | [284] | graph is not associated to an individual patient                     |  | graph is not associated to an individual patient                     |
| <b>Goodwin, Travis R.; Harabagiu, Sanda M.</b>                                                                                  | Medical Question Answering for Clinical Decision Support                                          | 2016 | [285] | graph is not associated to an individual patient                     |  | graph is not associated to an individual patient                     |
| <b>Goodwin, Travis R.; Harabagiu, Sanda M.</b>                                                                                  | Knowledge Representations and Inference Techniques for Medical Question Answering                 | 2018 | [286] | graph is not associated to an individual patient                     |  | graph is not associated to an individual patient                     |
| <b>Hanzlicek, Petr; Spidlen, Josef; Heroutova, Helena; Nagy, Miroslav</b>                                                       | User interface of MUDR electronic health record                                                   | 2005 | [287] | term "graph" is used for something different than for patient graphs |  | term "graph" is used for something different than for patient graphs |
| <b>Herskovic, Jorge R.; Subramanian, Devika; Cohen, Trevor; Bozzo-Silva, Pamela A.; Bearden, Charles F.; Bernstam, Elmer V.</b> | Graph-based signal integration for high-throughput phenotyping                                    | 2012 | [288] | term "graph" is used for something different than for patient graphs |  | term "graph" is used for something different than for patient graphs |
| <b>Honglan, L.; Xiaona, Q.; Bin, F.</b>                                                                                         | The Symptoms and Pathogenesis Entity Recognition of TCM Medical Records Based on CRF              | 2015 | [289] | term "graph" is used for something different than for patient graphs |  | term "graph" is used for something                                   |

|                                                                                                                                                   |                                                                                                                                 |      |       |                                                                      |  |                                                                      |
|---------------------------------------------------------------------------------------------------------------------------------------------------|---------------------------------------------------------------------------------------------------------------------------------|------|-------|----------------------------------------------------------------------|--|----------------------------------------------------------------------|
|                                                                                                                                                   |                                                                                                                                 |      |       |                                                                      |  | different than for patient graphs                                    |
| <b>Huet, B.; Artigou, J. Y.; Poirier, J.; Blain, G.</b>                                                                                           | Meta-modelling: the appropriate solution for a family of applications                                                           | 2001 | [290] | term "graph" is used for something different than for patient graphs |  | term "graph" is used for something different than for patient graphs |
| <b>Huet, B.; Pourriat, J. L.; Martin, J.; Cupa, M.</b>                                                                                            | An automaton computer program for a microcomputerized real-time (thesaurus based) abstract medical record                       | 1982 | [291] | term "graph" is used for something different than for patient graphs |  | term "graph" is used for something different than for patient graphs |
| <b>Jeunemaitre, X.; Degoulet, P.; Morice, V.; Chatellier, G.; Devries, C.; Plouin, P. F.; Boisvieux, J. F.; Menard, J.</b>                        | Testing an expert system for hypertension                                                                                       | 1986 | [292] | term "graph" is used for something different than for patient graphs |  | term "graph" is used for something different than for patient graphs |
| <b>Ji, Xiang; Ae Chun, Soon; Geller, James</b>                                                                                                    | Predicting Comorbid Conditions and Trajectories using Social Health Records                                                     | 2016 | [293] | term "graph" is used for something different than for patient graphs |  | graph is not associated to an individual patient                     |
| <b>Kavuluru, Ramakanth; Han, Sifei; Harris, Daniel</b>                                                                                            | Unsupervised Extraction of Diagnosis Codes from EMRs Using Knowledge-Based and Extractive Text Summarization Techniques         | 2013 | [294] | graph is not associated to an individual patient                     |  | term "graph" is used for something different than for patient graphs |
| <b>Kerschberger, Bernhard; Hilderbrand, Katherine; Boule, Andrew M.; Coetzee, David; Goemaere, Eric; Azevedo, Virginia de; van Cutsem, Gilles</b> | The effect of complete integration of HIV and TB services on time to initiation of antiretroviral therapy: a before-after study | 2012 | [295] | graph is not associated to an individual patient                     |  | graph is not associated to an individual patient                     |
| <b>Koopman, Bevan</b>                                                                                                                             | Semantic Search As Inference: Applications in Health Informatics                                                                | 2014 | [296] | graph is not associated to an individual patient                     |  | general essay, no specific data example                              |
| <b>Koopman, Bevan; Zuccon, Guido; Bruza, Peter; Sitbon, Laurianne; Lawley, Michael</b>                                                            | Graph-based Concept Weighting for Medical Information Retrieval                                                                 | 2012 | [297] | graph is not associated to an individual patient                     |  | graph is not associated to an individual patient                     |
| <b>Mondal, S.; Mukherjee, N.</b>                                                                                                                  | Mobile-assisted remote healthcare delivery                                                                                      | 2016 | [298] | term "graph" is used for something different than for patient graphs |  | graph is not associated to an individual patient                     |
| <b>Monsen, Karen A.; Banerjee, Arindam; Das, Puja</b>                                                                                             | Discovering client and intervention patterns in home visiting data                                                              | 2010 | [299] | term "graph" is used for something different than for patient graphs |  | graph is not associated to an individual patient                     |
| <b>Muller, R.; Sergl, M.; Nauerth, U.; Schoppe, D.; Pommerening, K.; Dittrich, H. M.</b>                                                          | THEMPO: a knowledge-based system for therapy planning in pediatric oncology                                                     | 1997 | [300] | term "graph" is used for something different than for patient graphs |  | graph is not associated to an individual patient                     |
| <b>Ni, J.; Fei, H.; Fan, W.; Zhang, X.</b>                                                                                                        | Automated Medical Diagnosis by Ranking Clusters Across the Symptom-Disease Network                                              | 2017 | [301] | term "graph" is used for something different than for patient graphs |  | graph is not associated to an individual patient                     |



|                                                                                                                                                                                     |                                                                                                                         |      |       |                                                                      |                                                        |                                                                                |
|-------------------------------------------------------------------------------------------------------------------------------------------------------------------------------------|-------------------------------------------------------------------------------------------------------------------------|------|-------|----------------------------------------------------------------------|--------------------------------------------------------|--------------------------------------------------------------------------------|
| <b>O'Neil, M.; Payne, C.; Read, J.</b>                                                                                                                                              | Read Codes Version 3: a user led terminology                                                                            | 1995 | [302] | term "graph" is used for something different than for patient graphs |                                                        | graph is not associated to an individual patient                               |
| <b>Pietrzyk, P. M.</b>                                                                                                                                                              | Free text analysis                                                                                                      | 1995 | [303] | term "graph" is used for something different than for patient graphs |                                                        | general essay, no specific data example                                        |
| <b>Săcărea, C.; Şotropa, D.; Troancă, D.</b>                                                                                                                                        | Symptoms investigation by means of formal concept analysis for enhancing medical diagnoses                              | 2017 | [304] | graph is not associated to an individual patient                     |                                                        | graph is not associated to an individual patient                               |
| <b>Soulakis, Nicholas D.; Carson, Matthew B.; Lee, Young Ji; Schneider, Daniel H.; Skeeahan, Connor T.; Scholtens, Denise M.</b>                                                    | Visualizing collaborative electronic health record usage for hospitalized patients with heart failure                   | 2015 | [305] | term "graph" is used for something different than for patient graphs |                                                        | graph is not associated to an individual patient                               |
| <b>Zhang, Zhaoyang; Wang, Honggang; Wang, Chonggang; Fang, Hua</b>                                                                                                                  | Cluster-based Epidemic Control Through Smartphone-based Body Area Networks                                              | 2015 | [306] | graph is not associated to an individual patient                     |                                                        | graph is not associated to an individual patient                               |
| <b>Adamusiak, Tomasz; Shimoyama, Naoki; Shimoyama, Mary</b>                                                                                                                         | Next generation phenotyping using the unified medical language system                                                   | 2014 | [307] |                                                                      | No graph mentioned                                     | graph is not associated to an individual patient                               |
| <b>Alvarez, Jose Mar\`ia; Polo, Luis; Jimenez, Weena; Abella, Pablo; Labra, Jose Emilio</b>                                                                                         | Application of the Spreading Activation Technique for Recommending Concepts of Well-known Ontologies in Medical Systems | 2011 | [308] |                                                                      | Not associated with patient                            | graph is not associated to patient data but to spoken language about a patient |
| <b>Antonakakis, Marios; Dimitriadis, Stavros I.; Zervakis, Michalis; Micheloyannis, Sifis; Rezaie, Roozbeh; Babajani-Feremi, Abbas; Zouridakis, George; Papanicolaou, Andrew C.</b> | Altered cross-frequency coupling in resting-state MEG after mild traumatic brain injury                                 | 2016 | [309] |                                                                      | Not used for patient data in general but brain regions | graph is not associated to patient data but to spoken language about a patient |
| <b>Arantes, W. Manzi de; Verdier, C.</b>                                                                                                                                            | Public health alert system for health networks: application to cardiology                                               | 2005 | [310] |                                                                      | Not used for patient data directly                     | graph is not associated to patient data but to spoken language about a patient |
| <b>Athreya, A. P.; Ngiam, K. Y.; Luo, Z.; Tai, E. S.; Kalbarczyk, Z.; Iyer, R. K.</b>                                                                                               | Towards Longitudinal Analysis of a Population's Electronic Health Records Using Factor Graphs                           | 2016 | [311] |                                                                      | Pupulation data, not individuals                       | graph is not associated to an individual patient                               |
| <b>Dhulekar, Nimit; Oztan, Basak; Yener, Bülent; Bingol, Haluk O.; Irim, Gulcin; Aktekin, Berrin; Aykut-Bingöl, Canan</b>                                                           | Graph-theoretic Analysis of Epileptic Seizures on Scalp EEG Recordings                                                  | 2014 | [312] |                                                                      | no patient data in general, only eeg                   | graph is not associated to patient data but to spoken language about a patient |
| <b>Frazier, George F.</b>                                                                                                                                                           | An Incremental Algorithm for Building Temporal Quadrees                                                                 | 1993 | [313] |                                                                      | no patient data                                        | term "graph" is used for something                                             |

|                                                                                                                            |                                                                                                                                                                                                                         |      |       |  |                                                                      |                                                                                |
|----------------------------------------------------------------------------------------------------------------------------|-------------------------------------------------------------------------------------------------------------------------------------------------------------------------------------------------------------------------|------|-------|--|----------------------------------------------------------------------|--------------------------------------------------------------------------------|
|                                                                                                                            |                                                                                                                                                                                                                         |      |       |  |                                                                      | different than for patient graphs                                              |
| <b>Gerson, C. D.; Gerson, M-J</b>                                                                                          | Technical report: an ePRO patient reported outcome program for the evaluation of patients with irritable bowel syndrome                                                                                                 | 2014 | [314] |  | graph as visualization                                               | term "graph" is used for something different than for patient graphs           |
| <b>Ghosh, Priyanka; Kalyanaraman, Ananth</b>                                                                               | A Fast Sketch-based Assembler for Genomes                                                                                                                                                                               | 2016 | [315] |  | no patient data but gene assembly                                    | term "graph" is used for something different than for patient graphs           |
| <b>Gopakumar, Shivapratap; Tran, Truyen; Nguyen, Tu Dinh; Phung, Dinh; Venkatesh, Svetha</b>                               | Stabilizing high-dimensional prediction models using feature graphs                                                                                                                                                     | 2015 | [316] |  | no data of individual patients                                       | graph is not associated to an individual patient                               |
| <b>Heer, Jeffrey; Perer, Adam</b>                                                                                          | Orion: A system for modeling, transformation and visualization of multidimensional heterogeneous networks                                                                                                               | 2014 | [317] |  | no data of individual patients                                       | graph is not associated to an individual patient                               |
| <b>Jing, X.; Cimino, J. J.</b>                                                                                             | A complementary graphical method for reducing and analyzing large data sets. Case studies demonstrating thresholds setting and selection                                                                                | 2014 | [318] |  | no graph representation of data but graph reduction                  | Only a converter for semantic data representation database                     |
| <b>Jupin, Joseph; Shi, Justin Y.</b>                                                                                       | Identity Tracking in Big Data: Preliminary Research Using In-Memory Data Graph Models for Record Linkage and Probabilistic Signature Hashing for Approximate String Matching in Big Health and Human Services Databases | 2014 | [319] |  | no graph representation of data but record linkage                   | general essay, no specific data example                                        |
| <b>Lieberman, Michael D.; Taheri, Sima; Guo, whatever; Mirrashed, Fatemeh; Yahav, Inbal; Aris, Aleks; Shneiderman, Ben</b> | Visual Exploration Across Biomedical Databases                                                                                                                                                                          | 2011 | [320] |  | graph as visualization                                               | term "graph" is used for something different than for patient graphs           |
| <b>Luz, Saturnino; Kane, Bridget</b>                                                                                       | Classification of Patient Case Discussions Through Analysis of Vocalisation Graphs                                                                                                                                      | 2009 | [321] |  | term "graph" is used for something different than for patient graphs | graph is not associated to patient data but to spoken language about a patient |
| <b>Mattson, Donald C.; Yang, Jing</b>                                                                                      | The Child Therapy Tracking System (CTTS): A model for an expressive therapy electronic health record (EHR)                                                                                                              | 2013 | [322] |  | term "graph" is used for something different than for patient graphs | term "graph" is used for something different than for patient graphs           |
| <b>Muller, R.</b>                                                                                                          | The CliniCon framework for context representation in electronic patient records                                                                                                                                         | 1997 | [323] |  | term "graph" is used for something different than for patient graphs | graph is not associated to an individual patient                               |

|                                                                                                                                                                                               |                                                                                 |      |       |  |                                                                      |                                                                      |
|-----------------------------------------------------------------------------------------------------------------------------------------------------------------------------------------------|---------------------------------------------------------------------------------|------|-------|--|----------------------------------------------------------------------|----------------------------------------------------------------------|
| <b>Noren, G. Niklas; Hopstadius, Johan; Bate, Andrew; Star, Kristina; Edwards, I. Ralph</b>                                                                                                   | Temporal pattern discovery in longitudinal electronic patient records           | 2010 | [324] |  | graph is not associated to an individual patient                     | term "graph" is used for something different than for patient graphs |
| <b>Nose, Y.; Akazawa, K.; Watanabe, Y.; Yokota, M.; Okamura, S.; Maehara, Y.; Sugimachi, K.</b>                                                                                               | Cancer registration using case history database in hospital information system  | 1988 | [325] |  | term "graph" is used for something different than for patient graphs | term "graph" is used for something different than for patient graphs |
| <b>Ogushi, Y.; Haruki, Y.; Okada, Y.; Takahashi, M.; Shimizu, M.; Izumi, Y.; Watabe, T.; Kobayashi, S.; Okuyama, J.; Kurita, Y.</b>                                                           | Development and evaluation of regional health database systems                  | 1998 | [326] |  | term "graph" is used for something different than for patient graphs | term "graph" is used for something different than for patient graphs |
| <b>Oladimeji, Ebenezer A.; Chung, Lawrence; Jung, Hyo Taeg; Kim, Jaehyoun</b>                                                                                                                 | Managing Security and Privacy in Ubiquitous eHealth Information Interchange     | 2011 | [327] |  | term "graph" is used for something different than for patient graphs | term "graph" is used for something different than for patient graphs |
| <b>Onimura, N.; Yamashita, T.; Nakayama, N.; Soejima, H.; Hirokawa, S.</b>                                                                                                                    | Generation of Sentence Template Graph from SOAP Format Medical Documents        | 2016 | [328] |  | graph is not associated to an individual patient                     | term "graph" is used for something different than for patient graphs |
| <b>Oshiro, Tatsuo; Oshiro, Hisako; Tanimizu, Masahito</b>                                                                                                                                     | Effective methods of organizing complex information in advanced cancer patients | 2014 | [329] |  | graph is not associated to an individual patient                     | term "graph" is used for something different than for patient graphs |
| <b>Osop, H.; Sahama, T.</b>                                                                                                                                                                   | Electronic health records: Improvement to healthcare decision-making            | 2016 | [330] |  | graph is not associated to an individual patient                     | term "graph" is used for something different than for patient graphs |
| <b>Poscia, Roberto; Ghio, Stefano; D'Alto, Michele; Vitulo, Patrizio; Mule, Massimiliano; Albera, Carlo; Parisi, Francesco; Badagliacca, Roberto; Fedele, Francesco; Vizza, Carmine Dario</b> | 'Real-life' information on pulmonary arterial hypertension: the iPHnet Project  | 2014 | [331] |  | term "graph" is used for something different than for patient graphs | term "graph" is used for something different than for patient graphs |
| <b>Staubert, S.; Schaaf, M.; Jahn, F.; Brandner, R.; Winter, A.</b>                                                                                                                           | Modeling Interoperable Information Systems with 3LGM(2) and IHE                 | 2015 | [332] |  | term "graph" is used for something different than for patient graphs | term "graph" is used for something different than for patient graphs |
| <b>Techentin, R.; Sauver, J. S.; Huddleston, J.; Gilbert, B.; Holmes, D.</b>                                                                                                                  | Lessons learned from the semantic translation of healthcare data                | 2014 | [333] |  | graph is not associated to an individual patient                     | Only a converter for semantic data representation database           |

|                                                  |                                                                                             |      |       |  |                                                  |                                                  |
|--------------------------------------------------|---------------------------------------------------------------------------------------------|------|-------|--|--------------------------------------------------|--------------------------------------------------|
| <b>Whyatt, Caroline P.; Torres, Elizabeth B.</b> | The Social-dance: Decomposing Naturalistic Dyadic Interaction Dynamics to the 'Micro-level' | 2017 | [334] |  | graph is not associated to an individual patient | graph is not associated to an individual patient |
|--------------------------------------------------|---------------------------------------------------------------------------------------------|------|-------|--|--------------------------------------------------|--------------------------------------------------|

## References

1. Abbs v. Sullivan. Fed Report. 1992;963:918–29.
2. Adin CA, Gregory CR, Kyles AE, Cowgill L. Diagnostic predictors of complications and survival after renal transplantation in cats. *VETERINARY SURGERY*. 2001;30:515–21. doi:10.1053/jvet.2001.28418.
3. Agogo GO, van der Voet H, van't Veer P, Ferrari P, Leenders M, Muller DC, et al. Use of two-part regression calibration model to correct for measurement error in episodically consumed foods in a single-replicate study design: EPIC case study. *PLoS One*. 2014;9:e113160. doi:10.1371/journal.pone.0113160.
4. Amit M, Yen TC, Liao CT, Chaturvedi P, Agarwal JP, Kowalski LP, et al. The origin of regional failure in oral cavity squamous cell carcinoma with pathologically negative neck metastases. *JAMA Otolaryngol Head Neck Surg*. 2014;140:1130–7. doi:10.1001/jamaoto.2014.1539.
5. Andreano A, Rebora P, Valsecchi MG, Russo AG. Adherence to guidelines and breast cancer patients survival: a population-based cohort study analyzed with a causal inference approach. *Breast Cancer Res Treat*. 2017;164:119–31. doi:10.1007/s10549-017-4210-z.
6. Anindya IC, Roy H, Kantarcioglu M, Malin B. Building a Dossier on the Cheap: Integrating Distributed Personal Data Resources Under Cost Constraints. In: New York, NY, USA: ACM; 2017. p. 1549–1558. doi:10.1145/3132847.3132951.
7. Antani S. Integrating image and text information for biomedical information retrieval. In: ; 2010. p. 3. doi:10.1109/CBMS.2010.6042631.
8. Anwar MN, Oakes MP. Data Mining of Audiology Patient Records: Factors Influencing the Choice of Hearing Aid Type. In: New York, NY, USA: ACM; 2011. p. 11–18. doi:10.1145/2064696.2064701.
9. Anwar MN, Oakes MP. Data mining of audiology patient records: factors influencing the choice of hearing aid type. *BMC Med Inform Decis Mak*. 2012;12 Suppl 1:S6. doi:10.1186/1472-6947-12-S1-S6.
10. Arcilla MJB, Ang VCT, Ochoa MN, Padua CPL, Payawal RE. Kidnew: The Kidney Transplant Patient Personal Health Buddy. In: New York, NY, USA: ACM; 2015. p. 133–134. doi:10.1145/2750511.2750539.
11. Atreja A, Khan S, Rogers JD, Ootoba E, Patel NP, Ullman T, et al. Impact of the Mobile HealthPROMISE Platform on the Quality of Care and Quality of Life in Patients With Inflammatory Bowel Disease: Study Protocol of a Pragmatic Randomized Controlled Trial. *JMIR Res Protoc*. 2015;4:e23. doi:10.2196/resprot.4042.
12. Bakel LA, Wilson K, Tyler A, Tham E, Reese J, Bothner J, Kaplan DW. A quality improvement study to improve inpatient problem list use. *Hosp Pediatr*. 2014;4:205–10. doi:10.1542/hpeds.2013-0060.
13. Baptista Macaroff WM, Castroman Espasandin P. Analgesic quality in a postoperative pain service: continuous assessment with the cumulative sum (cusum) method. *Rev Esp Anesthesiol Reanim*. 2007;54:11–6.
14. Barsky M, Stege U, Thomo A, Upton C. A Graph Approach to the Threshold All-against-all Substring Matching Problem. *J. Exp. Algorithmics*. 2008;12:1.10:1. doi:10.1145/1227161.1370601.
15. Bassily MN, Wilson R, Pompei F, Burmistrov D. Cancer survival as a function of age at diagnosis: a study of the Surveillance, Epidemiology and End Results database. *Cancer Epidemiol*. 2010;34:667–81. doi:10.1016/j.canep.2010.04.013.
16. Baud RH, Am RASSINOX, SCHERRER, JR. NATURAL-LANGUAGE PROCESSING AND SEMANTICAL REPRESENTATION OF MEDICAL TEXTS. *Methods Inf Med*. 1992;31:117–25.
17. Baud RH, Am RASSINOX, WAGNER JC, Lovis C, JUGE C, ALPAY LL, et al. REPRESENTING CLINICAL NARRATIVES USING CONCEPTUAL GRAPHS. *Methods Inf Med*. 1995;34:176–86.
18. Baud RH, Rassinoux AM, Scherrer JR. Natural language processing and semantical representation of medical texts. *Methods Inf Med*. 1992;31:117–25.
19. Bean DM, Wu H, Iqbal E, Dzahini O, Ibrahim ZM, Broadbent M, et al. Knowledge graph prediction of unknown adverse drug reactions and validation in electronic health records. *Sci Rep*. 2017;7:16416. doi:10.1038/s41598-017-16674-x.
20. Bean DM, Wu H, Iqbal E, Dzahini O, Ibrahim ZM, Broadbent M, et al. Author Correction: Knowledge graph prediction of unknown adverse drug reactions and validation in electronic health records. *Sci Rep*. 2018;8:4284. doi:10.1038/s41598-018-22521-4.
21. Beilin LJ, Bulpitt CJ, Coles EC, Dollery CT, Johnson BF, Mearns C, et al. Computer-based hypertension clinic records: a co-operative study. *Br Med J*. 1974;2:212–6.
22. Bellin E, Kalkut G. Is time-slice analysis superior to total hospital length of stay in demonstrating the effectiveness of a month-long intensive effort on a medicine service? *Qual Manag Health Care*. 2004;13:143–9.

23. Benedik P, Rajkovic U, Sustersic O. Toward the design of a nursing ontology system. *Comput Inform Nurs.* 2014;32:580–8. doi:10.1097/CIN.0000000000000117.
24. Bereg S, Zhang Y. Phylogenetic Networks Based on the Molecular Clock Hypothesis. *IEEE/ACM Trans. Comput. Biol. Bioinformatics.* 2007;4:661–7. doi:10.1109/tcbb.2007.1043.
25. Bernauer J, Franz M, Schoop D, Schoop M, Pretschner DP. The compositional approach for representing medical concept systems. *Medinfo.* 1995;8 Pt 1:70–4.
26. Bertrand D, Gascuel O. Topological Rearrangements and Local Search Method for Tandem Duplication Trees. *IEEE/ACM Trans. Comput. Biol. Bioinformatics.* 2005;2:15–28. doi:10.1109/TCBB.2005.15.
27. Bingham A. Computerized patient records benefit physician offices. *Healthc Financ Manage.* 1997;51:68–70.
28. Bono B de, Helvensteijn M, Kokash N, Martorelli I, Sarwar D, Islam S, et al. Requirements for the formal representation of pathophysiology mechanisms by clinicians. *INTERFACE FOCUS* 2016. doi:10.1098/rsfs.2015.0099.
29. Bordewich M, Gascuel O, Huber KT, Moulton V. Consistency of Topological Moves Based on the Balanced Minimum Evolution Principle of Phylogenetic Inference. *IEEE/ACM Trans. Comput. Biol. Bioinformatics.* 2009;6:110–7. doi:10.1109/TCBB.2008.37.
30. Brewer NT, Gilkey MB, Lillie SE, Hesse BW, Sheridan SL. Tables or bar graphs? Presenting test results in electronic medical records. *Med Decis Making.* 2012;32:545–53. doi:10.1177/0272989X12441395.
31. Britto MT, Jimison HB, Munafo JK, Wissman J, Rogers ML, Hersh W. Usability testing finds problems for novice users of pediatric portals. *J Am Med Inform Assoc.* 2009;16:660–9. doi:10.1197/jamia.M3154.
32. Brown AL. Constructing Chromosome Scale Suffix Trees. In: Darlinghurst, Australia, Australia: Australian Computer Society, Inc; 2004. p. 105–112.
33. Buchtela D, Anger Z, Peleska J, Vesely A, Zvarova J. Presentation of medical guidelines on a computer. *Stud Health Technol Inform.* 2004;105:166–71.
34. Bui AAT, Taira RK, Churchill B, Kangaroo H. Integrated visualization of problemcentric urologic patient records. *Ann N Y Acad Sci.* 2002;980:267–77.
35. Burgess HA. Use of the labor graph in Malawi. *J Nurse Midwifery.* 1986;31:46–52.
36. Butch SH. Practical use of computerized hospital information systems to improve blood transfusion. *Am J Clin Pathol.* 1997;107:S50-6.
37. Cates W, JR. Legal abortion: the public health record. *Science.* 1982;215:1586–90.
38. Cen S, Han L, Ma J. Ranking Weblogs by Analyzing Reading and Commenting Activities. In: Washington, DC, USA: IEEE Computer Society; 2009. p. 442–449. doi:10.1109/WI-IAT.2009.77.
39. Chazelle B. Technical Perspective: Finding a Good Neighbor, Near and Fast. *Commun. ACM.* 2008;51:115. doi:10.1145/1327452.1327493.
40. Chen P, Zhao T, Feng R, Chai J, Tong G, Wang D. Patterns and trends with cancer incidence and mortality rates reported by the China National Cancer Registry. *Asian Pac J Cancer Prev.* 2014;15:6327–32.
41. Chennamsetty H, Chalasani S, Riley D. Predictive analytics on Electronic Health Records (EHRs) using Hadoop and Hive. In: ; 2015. p. 1–5. doi:10.1109/ICECCT.2015.7226129.
42. Christinat Y, Moret BME. A Transcript Perspective on Evolution. *IEEE/ACM Trans. Comput. Biol. Bioinformatics.* 2013;10:1403–11. doi:10.1109/TCBB.2012.145.
43. Christofidis MJ, Hill A, Horswill MS, Watson MO. Observation charts with overlapping blood pressure and heart rate graphs do not yield the performance advantage that health professionals assume: an experimental study. *J Adv Nurs.* 2014;70:610–24. doi:10.1111/jan.12223.
44. Chung HH, Kim JW, Kang KW, Park N, Song Y, Chung J, Kang S. Post-treatment (1)(8)FFDG maximum standardized uptake value as a prognostic marker of recurrence in endometrial carcinoma. *Eur J Nucl Med Mol Imaging.* 2011;38:74–80. doi:10.1007/s00259-010-1614-y.
45. Cimino JJ, Clayton PD, Hripcsak G, Johnson SB. Knowledge-based approaches to the maintenance of a large controlled medical terminology. *J Am Med Inform Assoc.* 1994;1:35–50.
46. Collier T, Steenkamp R, Tomson C, Caskey F, Ansell D, Roderick P, Nitsch D. Patterns and effects of missing comorbidity data for patients starting renal replacement therapy in England, Wales and Northern Ireland. *Nephrol Dial Transplant.* 2011;26:3651–8. doi:10.1093/ndt/gfr111.
47. Cota E, Ribeiro L, Bezerra JS, Costa A, da Silva RE, Cota G. Using formal methods for content validation of medical procedure documents. *Int J Med Inform.* 2017;104:10–25. doi:10.1016/j.ijmedinf.2017.04.012.
48. Cruz JP, Libatique NJ, Tangonan G. Steganography and data hiding in flash video (FLV). In: ; 2012. p. 1–6. doi:10.1109/TENCON.2012.6412279.
49. Cypko MA, Wojdziaik J, Stoehr M, Kirchner B, Preim B, Dietz A, et al. Visual Verification of Cancer Staging for Therapy Decision Support. *COMPUTER GRAPHICS FORUM.* 2017;36:109–20. doi:10.1111/cgf.13172.
50. Dabek F, Caban JJ. A grammar-based approach to model the patient's clinical trajectory after a mild traumatic brain injury. In: ; 2015. p. 723–730. doi:10.1109/BIBM.2015.7359775.
51. Dabek F, Chen J, Garbarino A, Caban JJ. Visualization of Longitudinal Clinical Trajectories Using a Graph-based Approach. In: New York, NY, USA: ACM; 2015. p. 5:1. doi:10.1145/2836034.2836039.
52. Dahl MR, Vedsted P. Personal data and confidentiality on the Internet. *Ugeskr Laeger.* 2008;170:4027–9.

53. Danaei G, Garcia Rodriguez LA, Fernandez Cantero O, Logan R, Hernan MA. Observational data for comparative effectiveness research: An emulation of randomised trials of statins and primary prevention of coronary heart disease. *STATISTICAL METHODS IN MEDICAL RESEARCH*. 2013;22:70–96. doi:10.1177/0962280211403603.
54. Davidson S, Natan D, Novikov I, Sokolover N, Erlich A, Shamir R. Body mass index and weight-for-length ratio references for infants born at 33–42 weeks gestation: a new tool for anthropometric assessment. *Clin Nutr*. 2011;30:634–9. doi:10.1016/j.clnu.2011.03.010.
55. Degnan JH, Rosenberg NA, Stadler T. A Characterization of the Set of Species Trees That Produce Anomalous Ranked Gene Trees. *IEEE/ACM Trans. Comput. Biol. Bioinformatics*. 2012;9:1558–68. doi:10.1109/TCBB.2012.110.
56. Delman BS. A problem-oriented approach to journal selection for hospital libraries. *Bull Med Libr Assoc*. 1982;70:397–410.
57. Dent RM, Penwarden RM, Harris N, Hotz SB. Development and evaluation of patient-centered software for a weight-management clinic. *OBESITY RESEARCH*. 2002;10:651–6. doi:10.1038/oby.2002.88.
58. Dietz KR, Zhang L, Seidel FG. The transverse diameter of the chest on routine radiographs reliably estimates gestational age and weight in premature infants. *Pediatr Radiol*. 2015;45:1303–7. doi:10.1007/s00247-015-3332-x.
59. Diprose GK, Evans DH, Levene MI. A microcomputer monitoring and data-acquisition system for intensive care units. *J Med Eng Technol*. 1985;9:80–4.
60. Elliott D, Allen E, McKinley S, Perry L, Duffield C, Fry M, et al. User acceptance of observation and response charts with a track and trigger system: a multisite staff survey. *J Clin Nurs*. 2016;25:2211–22. doi:10.1111/jocn.13303.
61. Engholm G, Ferlay J, Christensen N, Bray F, Gjerstorff ML, Klint A, et al. NORDCAN--a Nordic tool for cancer information, planning, quality control and research. *Acta Oncol*. 2010;49:725–36. doi:10.3109/02841861003782017.
62. Erkal S, Gerberich SG, Ryan AD, Renier CM, Alexander BH. Animal-related injuries: a population-based study of a five-state region in the upper Midwest: Regional Rural Injury Study II. *J Safety Res*. 2008;39:351–63. doi:10.1016/j.jsr.2008.03.002.
63. Evandt J, Oftedal B, Krog NH, Skurtveit S, Nafstad P, Schwarze PE, et al. Road traffic noise and registry based use of sleep medication. *Environ Health*. 2017;16:110. doi:10.1186/s12940-017-0330-5.
64. Evans JM, MacDonald TM. Misclassification and selection bias in case-control studies using an automated database. *Pharmacoepidemiol Drug Saf*. 1997;6:313–8. doi:10.1002/(SICI)1099-1557(199709/10)6:5<313::AID-PDS292>3.0.CO;2-K.
65. Faeder JR, Blinov ML, Hlavacek WS. Graphical Rule-based Representation of Signal-transduction Networks. In: New York, NY, USA: ACM; 2005. p. 133–140. doi:10.1145/1066677.1066712.
66. Faloutsos C. Future Directions in Data Mining: Streams, Networks, Self-similarity and Power Laws. In: New York, NY, USA: ACM; 2002. p. 93. doi:10.1145/584792.584794.
67. Faloutsos C, Kamel I. Beyond Uniformity and Independence: Analysis of R-trees Using the Concept of Fractal Dimension. In: New York, NY, USA: ACM; 1994. p. 4–13. doi:10.1145/182591.182593.
68. Fan K, Eisenberg M, Walsh A, Aiello A, Heller K. Hierarchical Graph-Coupled HMMs for Heterogeneous Personalized Health Data. In: New York, NY, USA: ACM; 2015. p. 239–248. doi:10.1145/2783258.2783326.
69. Farfan F, Hristidis V, Ranganathan A, Burke RP. Ontology-Aware Search on XML-based Electronic Medical Records. In: ; 2008. p. 1525–1527. doi:10.1109/ICDE.2008.4497611.
70. Fazeli Dehkordy S, Carlos RC, Hall KS, Dalton VK. Novel data sources for women's health research: mapping breast screening online information seeking through Google trends. *Acad Radiol*. 2014;21:1172–6. doi:10.1016/j.acra.2014.05.005.
71. Feng J, Zhu D. Faster Algorithms for Sorting by Transpositions and Sorting by Block Interchanges. *ACM Trans. Algorithms* 2007. doi:10.1145/1273340.1273341.
72. Ferreira TS, Luiz de Souza-Braga A, Soraia Cavalcanti-Valente G, Ferreira de Souza D, Moreira Carvalho-Alves E. Nursing audit: The impact of nursing annotation in the context of hospital gloss. *AQUICHAN*. 2009;9:38–49.
73. Finlayson SG, LePendu P, Shah NH. Building the graph of medicine from millions of clinical narratives. *Sci Data*. 2014;1:140032. doi:10.1038/sdata.2014.32.
74. Flack JR. Seven years experience with a computerized diabetes clinic database. *Medinfo*. 1995;8 Pt 1:332.
75. Florit AM, Mori AR, Simone M de, d'Annunzio V, Ricci FL, Lalle C. Context trees: representing co-operative healthcare activities in IREP. *Comput Methods Programs Biomed*. 1995;48:175–81.
76. Folio LR, Machado LB, Dwyer AJ. Multimedia-enhanced Radiology Reports: Concept, Components, and Challenges. *Radiographics*. 2018;38:462–82. doi:10.1148/rg.2017170047.
77. Forster JFY, Sun A, Weissman BA. Progress report on a post-radial keratotomy patient 20 years after surgery. *Eye Contact Lens*. 2007;33:334–7. doi:10.1097/ICL.0b013e318030f1b6.
78. Fors UG, Sandberg HC. Computer-aided risk management--a software tool for the Hidep model. *Quintessence Int*. 2001;32:309–20.
79. Fraccaro P, Vigo M, Balatsoukas P, van der Veer, Sabine N., Hassan L, Williams R, et al. Presentation of laboratory test results in patient portals: influence of interface design on risk interpretation and visual search behaviour. *BMC Med Inform Decis Mak* 2018. doi:10.1186/s12911-018-0589-7.
80. Friesen MR, Hamel C, McLeod RD. A mHealth application for chronic wound care: findings of a user trial. *Int J Environ Res Public Health*. 2013;10:6199–214. doi:10.3390/ijerph10116199.

81. Gail MH, Costantino JP, Pee D, Bondy M, Newman L, Selvan M, et al. Projecting individualized absolute invasive breast cancer risk in African American women. *J Natl Cancer Inst.* 2007;99:1782–92. doi:10.1093/jnci/djm223.
82. Galopin A, Bouaud J, Pereira S, Seroussi B. Using an ontological modeling to evaluate the consistency of clinical practice guidelines: application to the comparison of three guidelines on the management of adult hypertension. *Stud Health Technol Inform.* 2014;205:38–42.
83. Galopin A, Bouaud J, Pereira S, Seroussi B. An Ontology-Based Clinical Decision Support System for the Management of Patients with Multiple Chronic Disorders. *Stud Health Technol Inform.* 2015;216:275–9.
84. Garla V, Taylor C, Brandt C. Semi-supervised clinical text classification with Laplacian SVMs: an application to cancer case management. *J Biomed Inform.* 2013;46:869–75. doi:10.1016/j.jbi.2013.06.014.
85. Garrett WF, Fuchs H, Whitton MC, State A. Real-time Incremental Visualization of Dynamic Ultrasound Volumes Using Parallel BSP Trees. In: Los Alamitos, CA, USA: IEEE Computer Society Press; 1996. p. 235-ff.
86. Gevins AS, Yeager CL, Diamond SL. Interactive Analysis and Display of the Electroencephalogram (EEG) in Real Time. In: New York, NY, USA: ACM; 1974. p. 75–76. doi:10.1145/563182.563233.
87. Gibson TA, Goldberg DS. Evaluating Theoretical Models of Protein Interaction Network Evolution Without Seed Graphs. In: New York, NY, USA: ACM; 2013. p. 724:724. doi:10.1145/2506583.2512388.
88. Glinkowski W. Web-Based Support for Fracture Healing Evaluation and Monitoring. *TELEMEDICINE AND E-HEALTH.* 2011;17:201–10. doi:10.1089/tmj.2010.0131.
89. Goodwin T, Harabagiu S. Embedding Open-domain Common-sense Knowledge from Text. *LREC Int Conf Lang Resour Eval.* 2016;2016:4621–8.
90. Grinspan ZM, Abramson EL, Banerjee S, Kern LM, Kaushal R, Shapiro JS. Potential value of health information exchange for people with epilepsy: crossover patterns and missing clinical data. *AMIA Annu Symp Proc.* 2013;2013:527–36.
91. Gunter C. Detecting Roles and Anomalies in Hospital Access Audit Logs. In: New York, NY, USA: ACM; 2014. p. 1. doi:10.1145/2665936.2668879.
92. Guzzi PH, Mina M. Towards the Assessment of Semantic Similarity Analysis of Protein Data: Main Approaches and Issues. *ACM SIGBioinformatics Rec.* 2012;2:17–8. doi:10.1145/2384691.2384694.
93. Hackney DN, Knudtson EJ, Rossi KQ, Krugh D, O'Shaughnessy RW. Management of pregnancies complicated by anti-c isoimmunization. *Obstet Gynecol.* 2004;103:24–30. doi:10.1097/01.AOG.0000109206.22354.2C.
94. Halachev M, Shiri N, Thamildurai A. Exact Match Search in Sequence Data Using Suffix Trees. In: New York, NY, USA: ACM; 2005. p. 123–130. doi:10.1145/1099554.1099579.
95. Harsola A, Thale S, Panse MS. Low Cost Digital Stethoscope for Heart Sounds. In: New York, NY, USA: ACM; 2011. p. 1275–1279. doi:10.1145/1980022.1980304.
96. Hartzler AL, Izard JP, Dalkin BL, Mikles SP, Gore JL. Design and feasibility of integrating personalized PRO dashboards into prostate cancer care. *JOURNAL OF THE AMERICAN MEDICAL INFORMATICS ASSOCIATION.* 2016;23:38–47. doi:10.1093/jamia/ocv101.
97. Hausler R, Washburn D, Rey P, Stefanoff F. Acquiring otoneurological results by computer. Evaluation after 2 years of experience. *Ann Otolaryngol Chir Cervicofac.* 1982;99:403–8.
98. Henry SB, Mead CN. Nursing classification systems: necessary but not sufficient for representing "what nurses do" for inclusion in computer-based patient record systems. *J Am Med Inform Assoc.* 1997;4:222–32.
99. Henzinger MR, King V, Warnow T. Constructing a Tree from Homeomorphic Subtrees, with Applications to Computational Evolutionary Biology. In: Philadelphia, PA, USA: Society for Industrial and Applied Mathematics; 1996. p. 333–340.
100. Herman T, Pemmaraju SV, Segre AM, Polgreen PM, Curtis DE, Fries J, et al. Wireless Applications for Hospital Epidemiology. In: New York, NY, USA: ACM; 2009. p. 45–50. doi:10.1145/1540373.1540384.
101. Hettne K, Soiland-Reyes S, Klyne G, Belhajjame K, Gamble M, Bechhofer S, et al. Workflow Forever: Semantic Web Semantic Models and Tools for Preserving and Digitally Publishing Computational Experiments. In: New York, NY, USA: ACM; 2012. p. 36–37. doi:10.1145/2166896.2166909.
102. Hofer C, Kiechl S, Lang W. The Austrian Stroke-Unit-Registry. *Wien Med Wochenschr.* 2008;158:411–7. doi:10.1007/s10354-008-0563-6.
103. Hoimyr H, Christensen TD, Emmertsen K, Johnsen SP, Riis A, Hansen OK, Hjortdal VE. Surgical repair of coarctation of the aorta: up to 40 years of follow-up. *Eur J Cardiothorac Surg.* 2006;30:910–6. doi:10.1016/j.ejcts.2006.09.016.
104. Hripcsak G, Soulakis ND, Li L, Morrison FP, Lai AM, Friedman C, et al. Syndromic surveillance using ambulatory electronic health records. *J Am Med Inform Assoc.* 2009;16:354–61. doi:10.1197/jamia.M2922.
105. Huang H, Gong T, Ye N, Wang R, Dou Y. Private and Secured Medical Data Transmission and Analysis for Wireless Sensing Healthcare System. *IEEE Transactions on Industrial Informatics.* 2017;13:1227–37. doi:10.1109/TII.2017.2687618.

106. Huesch MD, Schetter S, Segel J, Chetlen A. Evaluation of the "Angelina Jolie Effect" on Screening Mammography Utilization in an Academic Center. *JOURNAL OF THE AMERICAN COLLEGE OF RADIOLOGY*. 2017;14:1020–6. doi:10.1016/j.jacr.2017.03.016.
107. Islam SKH, Khan MK, Li X. Security Analysis and Improvement of 'a More Secure Anonymous User Authentication Scheme for the Integrated EPR Information System'. *PLoS One* 2015. doi:10.1371/journal.pone.0131368.
108. Italian cancer figures, report 2012: Cancer in children and adolescents. *Epidemiol Prev*. 2013;37:1–225.
109. Jacky JP, Kalet IJ. An Object-oriented Programming Discipline for Standard Pascal. *Commun. ACM*. 1987;30:772–6. doi:10.1145/30401.30403.
110. Jamakovic M, Baljic R. Significance of copper level in serum and routine laboratory parameters in estimation of outspreading of Hodgkin's lymphoma. *Med Arch*. 2013;67:185–7.
111. Jamil HM, Modica GA, Teran MA. Towards a Visual Query Interface for Phylogenetic Databases. In: New York, NY, USA: ACM; 2001. p. 57–64. doi:10.1145/502585.502596.
112. Jamison RN, Jurcik DC, Edwards RR, Huang C, Ross EL. A Pilot Comparison of a Smartphone App With or Without 2-Way Messaging Among Chronic Pain Patients: Who Benefits From a Pain App? *Clin J Pain*. 2017;33:676–86. doi:10.1097/AJP.0000000000000455.
113. Kawada T, Aoki S, Suzuki S. Management of personal health examination data for a population by use of a portable computer. *Nihon Koshu Eisei Zasshi*. 1992;39:105–7.
114. Kay M, Choe EK, Shepherd J, Greenstein B, Watson N, Consolvo S, Kientz JA. Lullaby: A Capture & Access System for Understanding the Sleep Environment. In: New York, NY, USA: ACM; 2012. p. 226–234. doi:10.1145/2370216.2370253.
115. Kazmierczak SC, Leen TK, Erdogmus D, Carreira-Perpinan MA. Reduction of multi-dimensional laboratory data to a two-dimensional plot: a novel technique for the identification of laboratory error. *Clin Chem Lab Med*. 2007;45:749–52. doi:10.1515/CCLM.2007.177.
116. Keenan GM, Lopez KD, Yao Y, Sousa VEC, Stifter J, Febretti A, et al. Toward Meaningful Care Plan Clinical Decision Support: Feasibility and Effects of a Simulated Pilot Study. *Nurs Res*. 2017;66:388–98. doi:10.1097/NNR.0000000000000234.
117. Kennedy I, Ritter H. Antenatal records: do they help us? A new record for watching fetal growth. *Trop Doct*. 1984;14:130–2. doi:10.1177/004947558401400310.
118. Kennedy I, Stephens B. A novel antenatal record to help midwives. *Practitioner*. 1979;223:18–24.
119. Khan IA. Personalized Electronic Health Record System for Monitoring Patients with Chronic Disease. In: ; 2013. p. 121–126. doi:10.1109/SIEDS.2013.6549505.
120. Khan A, Bhowmick SS, Bonchi F. Summarizing Static and Dynamic Big Graphs. *Proc. VLDB Endow*. 2017;10:1981–4. doi:10.14778/3137765.3137825.
121. Khan A, Elnikety S. Systems for Big-graphs. *Proc. VLDB Endow*. 2014;7:1709–10. doi:10.14778/2733004.2733067.
122. Klann JG, McCoy AB, Wright A, Wattanasin N, Sittig DF, Murphy SN. Health care transformation through collaboration on open-source informatics projects: integrating a medical applications platform, research data repository, and patient summarization. *Interact J Med Res*. 2013;2:e11. doi:10.2196/ijmr.2454.
123. Klann JG, Szolovits P, Downs SM, Schadow G. Decision support from local data: creating adaptive order menus from past clinician behavior. *J Biomed Inform*. 2014;48:84–93. doi:10.1016/j.jbi.2013.12.005.
124. Kofler J, Pesenhofer R, Landl G, Sommerfeld-Stur I, Peham C. Monitoring of dairy cow claw health status in 15 herds using the computerised documentation program Claw Manager and digital parameters. *Tierarztl Prax Ausg G Grosstiere Nutztiere*. 2013;41:31–44.
125. Kourtis G, Caiaffa M, Forte C, Scarlato MI, Macchia L. Retrospective monitoring in the management of persistent asthma. *Respir Care*. 2011;56:633–43. doi:10.4187/respcare.00796.
126. Kraus S, Castellanos I, Albermann M, Schuettler C, Prokosch H, Staudigel M, Toddenroth D. Using Arden Syntax for the Generation of Intelligent Intensive Care Discharge Letters. *Stud Health Technol Inform*. 2016;228:471–5.
127. Kushniruk A, Borycki E, Anderson JG, Anderson MM. Combining Two Forms of Simulation to Predict the Potential Impact of Interface Design on Technology-induced Error in Healthcare. In: San Diego, CA, USA: Society for Computer Simulation International; 2008. p. 497–504.
128. Kwon Y, Kang K, Bae C, Chung H, Kim JH. Lifelog agent for human activity pattern analysis on health avatar platform. *Healthc Inform Res*. 2014;20:69–75. doi:10.4258/hir.2014.20.1.69.
129. Labarre A, Verwer S. Merging Partially Labelled Trees: Hardness and a Declarative Programming Solution. *IEEE/ACM Trans. Comput. Biol. Bioinformatics*. 2014;11:389–97. doi:10.1109/TCBB.2014.2307200.
130. Lancia G, Carr R, Walenz B, Istrail S. 101 Optimal PDB Structure Alignments: A Branch-and-cut Algorithm for the Maximum Contact Map Overlap Problem. In: New York, NY, USA: ACM; 2001. p. 193–202. doi:10.1145/369133.369199.
131. Landes SJ, Carlson EB, Ruzek JI, Wang D, Hugo E, DeGaetano N, et al. Provider-Driven Development of a Measurement Feedback System to Enhance Measurement-Based Care in VA Mental Health. *COGNITIVE AND BEHAVIORAL PRACTICE*. 2015;22:87–100. doi:10.1016/j.cbpra.2014.06.004.
132. Lee HJ, Kim JY, Kim SK, Lee JR, Suh CS, Kim SH. Learning Curve Analysis and Surgical Outcomes of Single-port Laparoscopic Myomectomy. *J Minim Invasive Gynecol*. 2015;22:607–11. doi:10.1016/j.jmig.2015.01.009.
133. Levin RJ. Incidence of thyroid cancer in residents surrounding the Three Mile Island nuclear facility. *Laryngoscope*. 2008;118:618–28. doi:10.1097/MLG.0b013e3181613ad2.



134. Lezcano L, Sanchez-Alonso S, Sicilia M. Associating clinical archetypes through UMLS Metathesaurus term clusters. *J Med Syst.* 2012;36:1249–58. doi:10.1007/s10916-010-9586-9.
135. Liabsuetrakul T, Prappre T, Pairoi P, Oumudee N, Islam M. Development of a web-based epidemiological surveillance system with health system response for improving maternal and newborn health: Field-testing in Thailand. *Health Informatics J.* 2017;23:109–23. doi:10.1177/1460458216628312.
136. Lin YL, Guerguerian A, Tomasi J, Laussen P, Trbovich P. Usability of data integration and visualization software for multidisciplinary pediatric intensive care: a human factors approach to assessing technology. *BMC Med Inform Decis Mak* 2017. doi:10.1186/s12911-017-0520-7.
137. Lin H, Wang Y, Jing L, Chang P. Mockup design of personal health diary app for patients with chronic kidney disease. *Stud Health Technol Inform.* 2014;201:124–32.
138. Liu W, Chung BC, Wang R, Ng J, Morlet N. A genetic algorithm enabled ensemble for unsupervised medical term extraction from clinical letters. *Health Inf Sci Syst.* 2015;3:5. doi:10.1186/s13755-015-0013-y.
139. Liu H, Dou D, Jin R, Lependu P, Shah N. Mining Biomedical Ontologies and Data Using RDF Hypergraphs. In: ; 2013. p. 141–146. doi:10.1109/ICMLA.2013.31.
140. Liu Y, Guo Z, Ke X, Zaiane OR. Protein Subcellular Localization Prediction with Associative Classification and Multi-class SVM. In: New York, NY, USA: ACM; 2011. p. 493–495. doi:10.1145/2147805.2147880.
141. Liu JM, Wu HW, Chen WS, Lin WC, Chao Y, Lui WY, Whang-Peng J. Integration of computer-assembled digital images and text data as evidence for the oncological record. *J Digit Imaging.* 2000;13:55–9.
142. Loorak MH, Perin C, Kamal N, Hill M, Carpendale S. TimeSpan: Using Visualization to Explore Temporal Multi-dimensional Data of Stroke Patients. *IEEE Trans Vis Comput Graph.* 2016;22:409–18. doi:10.1109/TVCG.2015.2467325.
143. Lopez KD, Wilkie DJ, Yao Y, Sousa V, Febretti A, Stifter J, et al. Nurses' Numeracy and Graphical Literacy: Informing Studies of Clinical Decision Support Interfaces. *J Nurs Care Qual.* 2016;31:124–30. doi:10.1097/NCQ.000000000000149.
144. Lovis C, Baud RH, Revillard C, Pult L, Borst F, Geissbuhler A. Paragraph-oriented structure for narratives in medical documentation. *Stud Health Technol Inform.* 2001;84:638–42.
145. Luo Y, Xin Y, Hochberg E, Joshi R, Uzuner O, Szolovits P. Subgraph augmented non-negative tensor factorization (SANTF) for modeling clinical narrative text. *J Am Med Inform Assoc.* 2015;22:1009–19. doi:10.1093/jamia/ocv016.
146. Luque-Fernandez MA, Zoega H, Valdimarsdottir U, Williams MA. Deconstructing the smoking-preeclampsia paradox through a counterfactual framework. *Eur J Epidemiol.* 2016;31:613–23. doi:10.1007/s10654-016-0139-5.
147. Madkour M, Song H, Du Jingcheng, Tao C. A representational analysis of a temporal indeterminacy display in clinical events. In: ; 2016. p. 1089–1095. doi:10.1109/BIBM.2016.7822673.
148. Mandal AK, Sarkar A. Formal representation of service interactions for SaaS based applications. In: ; 2014. p. 54–59. doi:10.1109/ICADIWT.2014.6814700.
149. Margusino-Framinan L, Cid-Silva P, Mena-de-Cea A, Sanclaudio-Luhia AI, Castro-Castro JA, Vazquez-Gonzalez G, Martin-Herranz I. Intelligent MONitoring System for antiviral pharmacotherapy in patients with chronic hepatitis C (SiMON-VC). *Farm Hosp.* 2017;41:68–88. doi:10.7399/fh.2017.41.1.10590.
150. Markazi-Moghaddam N, Arab M, Ravaghi H, Rashidian A, Khatibi T, Zargar Balaye Jame S. A Knowledge Map for Hospital Performance Concept: Extraction and Analysis: A Narrative Review Article. *Iran J Public Health.* 2016;45:843–54.
151. Martin GS, Tapsell LC, Batterham MJ, Russell KG. Relative bias in diet history measurements: a quality control technique for dietary intervention trials. *Public Health Nutr.* 2002;5:537–45. doi:10.1079/PHN2002329.
152. Martinez D, Otegi A, Soroa A, Agirre E. Improving search over Electronic Health Records using UMLS-based query expansion through random walks. *J Biomed Inform.* 2014;51:100–6. doi:10.1016/j.jbi.2014.04.013.
153. Martinez-Costa C, Schulz S. Validating EHR clinical models using ontology patterns. *J Biomed Inform.* 2017;76:124–37. doi:10.1016/j.jbi.2017.11.001.
154. Matthews SJ. Heterogeneous Compression of Large Collections of Evolutionary Trees. *IEEE/ACM Trans. Comput. Biol. Bioinformatics.* 2015;12:807–14. doi:10.1109/TCBB.2014.2366756.
155. Mechkour M, Mulhem P, Fourel F, Berrut EFC. PRIME-GC. A medical information retrieval prototype on the Web. In: ; 1997. p. 2–9. doi:10.1109/RIDE.1997.583681.
156. Mendonça EA, Johnson SB, Seol Y, Cimino JJ. Analyzing the Semantics of Patient Data to Rank Records of Literature Retrieval. In: Stroudsburg, PA, USA: Association for Computational Linguistics; 2002. p. 69–76. doi:10.3115/1118149.1118159.
157. Meystre SM, Lee S, Jung CY, Chevrier RD. Common data model for natural language processing based on two existing standard information models: CDA+GrAF. *J Biomed Inform.* 2012;45:703–10. doi:10.1016/j.jbi.2011.11.018.
158. Milicchio F, Tradigo G, Veltri P, Prospero M. High-performance Data Structures for De Novo Assembly of Genomes: Cache Oblivious Generic Programming. In: New York, NY, USA: ACM; 2016. p. 657–662. doi:10.1145/2975167.2985691.
159. Mirshahi A, Kohnen T. Scientific evaluation and quality assurance in refractive surgical interventions. Evaluation of the Datagraph med computer program. *Ophthalmologe.* 2002;99:629–35.

160. Mirzaei M, Truswell AS, Arnett K, Page A, Taylor R, Leeder SR. Cerebrovascular disease in 48 countries: secular trends in mortality 1950-2005. *J Neurol Neurosurg Psychiatry*. 2012;83:138–45. doi:10.1136/jnnp-2011-300408.
161. Morin P, Herrmann F, Ammann P, Uebelhart B, Rizzoli R. A rapid self-administered food frequency questionnaire for the evaluation of dietary protein intake. *Clin Nutr*. 2005;24:768–74. doi:10.1016/j.clnu.2005.03.002.
162. Moruzzi M. The new culture of dematerialized health. *Recenti Prog Med*. 2014;105:407–9. doi:10.1701/1680.18398.
163. Mossel E, Roch S, Steel M. Shrinkage Effect in Ancestral Maximum Likelihood. *IEEE/ACM Trans. Comput. Biol. Bioinformatics*. 2009;6:126–33. doi:10.1109/TCBB.2008.107.
164. Mozhayskiy V, Miller B, Ma K, Tagkopoulos I. A Scalable Multi-scale Framework for Parallel Simulation and Visualization of Microbial Evolution. In: New York, NY, USA: ACM; 2011. p. 7:1. doi:10.1145/2016741.2016749.
165. Muller R. The CliniCon framework for context representation in electronic patient records. *Proc AMIA Annu Fall Symp*. 1997:178–82.
166. Murphy CA, Carstens K, Villamayor P. Electronic growth charts: watching our patients grow. *AMIA Annu Symp Proc*. 2005:1058.
167. Mwaniki P, Ayieko P, Todd J, English M. Assessment of paediatric inpatient care during a multifaceted quality improvement intervention in Kenyan district hospitals--use of prospectively collected case record data. *BMC Health Serv Res*. 2014;14:312. doi:10.1186/1472-6963-14-312.
168. Myleus A, Stenlund H, Hernell O, Gothefors L, Hammarstrom M, Persson L, Ivarsson A. Early vaccinations are not risk factors for celiac disease. *Pediatrics*. 2012;130:e63-70. doi:10.1542/peds.2011-2806.
169. Nagar A, Al-Mubaid H, Bettayeb S. Computing Gene Functional Similarity Using Combined Graphs. In: New York, NY, USA: ACM; 2012. p. 1381–1386. doi:10.1145/2245276.2231995.
170. Newell SD, JR, Englert J, Box-Taylor A, Davis KM, Koch KE. Clinical efficiency tools improve stroke management in a rural southern health system. *Stroke*. 1998;29:1092–8.
171. Ng K, Ghoting A, Steinhubl SR, Stewart WF, Malin B, Sun J. PARAMO: a PARALLEL predictive MOdeling platform for healthcare analytic research using electronic health records. *J Biomed Inform*. 2014;48:160–70. doi:10.1016/j.jbi.2013.12.012.
172. Nielsen F. A Fielded Wiki for Personality Genetics. In: New York, NY, USA: ACM; 2010. p. 16:1. doi:10.1145/1832772.1832795.
173. Nikfarjam A, Emadzadeh E, Gonzalez G. Towards generating a patient's timeline: extracting temporal relationships from clinical notes. *J Biomed Inform*. 2013;46 Suppl:S40-7. doi:10.1016/j.jbi.2013.11.001.
174. Nori N, Kashima H, Yamashita K, Ikai H, Imanaka Y. Simultaneous Modeling of Multiple Diseases for Mortality Prediction in Acute Hospital Care. In: New York, NY, USA: ACM; 2015. p. 855–864. doi:10.1145/2783258.2783308.
175. Okamoto K, Tanaka H, Takemura T, Kume N, Kuroda T, Yoshihara H. A hypothesis-generating support system using medical records for clinical knowledge acquisition. In: ; 2012. p. 1130–1133. doi:10.1109/SCIS-ISIS.2012.6505123.
176. Orban K, Edberg A, Erlandsson L. Using a time-geographical diary method in order to facilitate reflections on changes in patterns of daily occupations. *Scand J Occup Ther*. 2012;19:249–59. doi:10.3109/11038128.2011.620981.
177. O'Sullivan EM. International variation in the incidence of oral and pharyngeal cancer. *Community Dent Health*. 2008;25:148–53.
178. Pabón MC, Montoya GA, Millán M. Mediation and graph data models for medical data integration. In: ; 2013. p. 1–9. doi:10.1109/CLEI.2013.6670647.
179. Parkin DM, Ferlay J, Curado M, Bray F, Edwards B, Shin H, Forman D. Fifty years of cancer incidence: CI5 I-IX. *Int J Cancer*. 2010;127:2918–27. doi:10.1002/ijc.25517.
180. Patil R, Karandikar RG. Digital signal preservation approaches of archived biomedical paper records #x2014; A review. In: ; 2016. p. 1–4. doi:10.1109/WECON.2016.7993456.
181. Pawloski P, Cusick D, Amborn L. Development of clinical pharmacy productivity metrics. *AMERICAN JOURNAL OF HEALTH-SYSTEM PHARMACY*. 2012;69:49–54. doi:10.2146/ajhp110126.
182. Payne TH, Andrews RD, Breeling J, Ben Davoren J, Smith RM, Volpp B. Graphing clinical events in the VA Computerized Patient Record System. *JOURNAL OF THE AMERICAN MEDICAL INFORMATICS ASSOCIATION*. 1999:1137.
183. Pedreschi D. Social Network Analytics, Data Science Ethics & Privacy-preserving Analytics. In: New York, NY, USA: ACM; 2017. doi:10.1145/3168836.3168841.
184. Penfield W. Physicians take to the field. *IDRC Rep*. 1992;20:28–30.
185. Pfeiffer KP. Actual state and perspectives of e-health in Austria and international--an overview. *Wien Med Wochenschr*. 2011;161:334–40. doi:10.1007/s10354-011-0008-5.
186. Pfundner A, Schnoeberg T, Horn J, Boyce RD, Samwald M. Utilizing the Wikidata System to Improve the Quality of Medical Content in Wikipedia in Diverse Languages: A Pilot Study. *JOURNAL OF MEDICAL INTERNET RESEARCH* 2015. doi:10.2196/jmir.4163.
187. Poon-Chue A, Menendez L, Gerstner MM, Colletti P, Terk M. MRI evaluation of post-operative seromas in extremity soft tissue sarcomas. *SKELETAL RADIOLOGY*. 1999;28:279–82. doi:10.1007/s002560050516.
188. Pourriat JL, Huet B, Gabry AL, Rolland C, Cupa M. Case summaries in real-time. Accomplishments with a microcomputer. *Ann Fr Anesth Reanim*. 1982;1:161–5.
189. Poursadegh M, Poursadegh F, Esmaeili M, Bakhshae M. Epidemiological Survey of Sinonasal Malignancy in North-East Iran. *Iran J Otorhinolaryngol*. 2015;27:225–9.

190. Powsner SM, Tuftte ER. Summarizing clinical psychiatric data. *Psychiatr Serv.* 1997;48:1458–61. doi:10.1176/ps.48.11.1458.
191. Preece MHW, Hill A, Horswill MS, Karamatic R, Watson MO. Designing observation charts to optimize the detection of patient deterioration: reliance on the subjective preferences of healthcare professionals is not enough. *Aust Crit Care.* 2012;25:238–52. doi:10.1016/j.aucc.2012.01.003.
192. Pryor J. A snapshot of rehabilitation referrals in rural New South Wales. *Aust Health Rev.* 2010;34:204–9. doi:10.1071/AH08713.
193. Rajagopalan MR, Vellaipandiyam S. Big data framework for national E-governance plan. In: ; 2013. p. 1–5. doi:10.1109/ICTKE.2013.6756283.
194. Rakic N. Acute sensorineural hearing loss at the Otorhinolaryngology Department of the General Hospital in Subotica 1991–1996. *Med Pregl.* 1999;52:44–52.
195. RAMAYYA GP. AXAUDIT - ANESTHETIC AUDIT SYSTEM. *INTERNATIONAL JOURNAL OF CLINICAL MONITORING AND COMPUTING.* 1992;9:149–58. doi:10.1007/BF01145167.
196. Rassinoux AM, Michel PA, Wagner J, Baud R. Current trends with natural language processing. *Medinfo.* 1995;8 Pt 2:1657.
197. Ratib O. From multimodality digital imaging to multimedia patient record. *Comput Med Imaging Graph.* 1994;18:59–65.
198. Reiz B, Csato L. Bayesian Network Classifier for Medical Data Analysis. *INTERNATIONAL JOURNAL OF COMPUTERS COMMUNICATIONS & CONTROL.* 2009;4:65–72. doi:10.15837/ijccc.2009.1.2414.
199. Rhea S, Weber DJ, Poole C, Cairns C. Risk factors for hospitalization after dog bite injury: a case-cohort study of emergency department visits. *Acad Emerg Med.* 2014;21:196–203. doi:10.1111/acem.12312.
200. Rizvi SZR, Fong PW. Interoperability of Relationship- and Role-Based Access Control. In: New York, NY, USA: ACM; 2016. p. 231–242. doi:10.1145/2857705.2857706.
201. Rizvi SZR, Fong PW, Crampton J, Sellwood J. Relationship-Based Access Control for an Open-Source Medical Records System. In: New York, NY, USA: ACM; 2015. p. 113–124. doi:10.1145/2752952.2752962.
202. Rocha J. Graph Comparison by Log-Odds Score Matrices with Application to Protein Topology Analysis. *IEEE/ACM Trans. Comput. Biol. Bioinformatics.* 2011;8:564–9. doi:10.1109/TCBB.2010.59.
203. Ruiz JG, Andrade AD, Hogue C, Karanam C, Akkineni S, Cevallos D, et al. The Association of Graph Literacy With Use of and Skills Using an Online Personal Health Record in Outpatient Veterans. *J Health Commun.* 2016;21:83–90. doi:10.1080/10810730.2016.1193915.
204. Ryu I, Siio I. TongueDx: A Tongue Diagnosis for Health Care on Smartphones. In: New York, NY, USA: ACM; 2014. p. 25:1. doi:10.1145/2582051.2582076.
205. Salinas O, Cosio G de, Clavel-Arcas C, Montoya J, Serpas M, Moran de Garcia S, Concha-Eastman A. An information system for injuries from external causes (SILEX): a successful project in El Salvador. *Rev Panam Salud Publica.* 2008;24:390–9.
206. Sauleau EA, Paumier J, Buemi A. Medical record linkage in health information systems by approximate string matching and clustering. *BMC Med Inform Decis Mak.* 2005;5:32. doi:10.1186/1472-6947-5-32.
207. Schenk RJ, JR, Schenk J. Integration of remote blood glucose meter upload technology into a clinical pharmacist medication therapy management service. *J Diabetes Sci Technol.* 2011;5:188–91. doi:10.1177/193229681100500126.
208. Schultz SE, Rothwell DM, Chen Z, Tu K. Identifying cases of congestive heart failure from administrative data: a validation study using primary care patient records. *Chronic Dis Inj Can.* 2013;33:160–6.
209. Schultz SE, Rothwell DM, Chen Z, Tu K. Identifying cases of congestive heart failure from administrative data: a validation study using primary care patient records. *Chronic Dis Inj Can.* 2013;33:160–6.
210. Sevick MA, Zickmund S, Korytkowski M, Piraino B, Sereika S, Mihalko S, et al. Design, feasibility, and acceptability of an intervention using personal digital assistant-based self-monitoring in managing type 2 diabetes. *Contemp Clin Trials.* 2008;29:396–409. doi:10.1016/j.cct.2007.09.004.
211. Sharit J, Lisigurski M, Andrade AD, Karanam C, Nazi KM, Lewis JR, Ruiz JG. The Roles of Health Literacy, Numeracy, and Graph Literacy on the Usability of the VA's Personal Health Record by Veterans. *J Usability Studies.* 2014;9:173–93.
212. Shaverdian AA, Zhou H, Michailidis G, Jagadish HV. Algebraic Visual Analysis: The Catalano Phone Call Data Set Case Study. In: New York, NY, USA: ACM; 2009. p. 74–82. doi:10.1145/1562849.1562858.
213. Shaw JLV, Cohen A, Konforte D, Binesh-Marvasti T, Colantonio DA, Adeli K. Validity of establishing pediatric reference intervals based on hospital patient data: a comparison of the modified Hoffmann approach to CALIPER reference intervals obtained in healthy children. *Clin Biochem.* 2014;47:166–72. doi:10.1016/j.clinbiochem.2013.11.008.
214. Sheridan J, Chamberlain K, Dupuis A. Timelining: visualizing experience. *QUALITATIVE RESEARCH.* 2011;11:552–69. doi:10.1177/1468794111413235.
215. Shibuya T. Geometric Suffix Tree: Indexing Protein 3-D Structures. *J. ACM.* 2010;57:15:1. doi:10.1145/1706591.1706595.
216. Shigli H, Tejas MH, Narayan L, Desai SD. User Intervention Based Segmentation of Myocardium In Cardiac Cine MRI Images. In: New York, NY, USA: ACM; 2015. p. 684–689. doi:10.1145/2791405.2791545.

217. Shim S, Kim D, Lee D, Lee S, Park J, Lee JJ, et al. Metabolic tumour volume and total lesion glycolysis, measured using preoperative 18F-FDG PET/CT, predict the recurrence of endometrial cancer. *BJOG*. 2014;121:1097-106; discussion 1106. doi:10.1111/1471-0528.12543.
218. Sills MR, Kwan BM, Yawn BP, Sauer BC, Fairclough DL, Federico MJ, et al. Medical home characteristics and asthma control: a prospective, observational cohort study protocol. *EGEMS (Wash DC)*. 2013;1:1032. doi:10.13063/2327-9214.1032.
219. Sim LLW, Ban KHK, Tan TW, Sethi SK, Loh TP. Development of a clinical decision support system for diabetes care: A pilot study. *PLoS One*. 2017;12:e0173021. doi:10.1371/journal.pone.0173021.
220. Sittig DF, Murphy DR, Smith MW, Russo E, Wright A, Singh H. Graphical display of diagnostic test results in electronic health records: a comparison of 8 systems. *J Am Med Inform Assoc*. 2015;22:900-4. doi:10.1093/jamia/ocv013.
221. SMART JF, ROUX M. A MODEL FOR MEDICAL KNOWLEDGE REPRESENTATION APPLICATION TO THE ANALYSIS OF DESCRIPTIVE PATHOLOGY REPORTS. *Methods Inf Med*. 1995;34:352-60.
222. Sobo EJ, Andriese S, Stroup C, Morgan D, Kurtin P. Developing indicators for emergency medical services (EMS) system evaluation and quality improvement: a statewide demonstration and planning project. *Jt Comm J Qual Improv*. 2001;27:138-54.
223. Soldes OS, Younger JG, Hirschl RB. Predictors of malignancy in childhood peripheral lymphadenopathy. *J Pediatr Surg*. 1999;34:1447-52.
224. Sondhi P, Sun J, Tong H, Zhai C. SympGraph: A Framework for Mining Clinical Notes Through Symptom Relation Graphs. In: New York, NY, USA: ACM; 2012. p. 1167-1175. doi:10.1145/2339530.2339712.
225. Sovik S, Skaga NO, Hanoa R, Eken T. Sudden survival improvement in critical neurotrauma: An exploratory analysis using a stratified statistical process control technique. *Injury*. 2014;45:1722-30. doi:10.1016/j.injury.2014.05.038.
226. Sridhar S, Dhamdhare K, Belloch G, Halperin E, Ravi R, Schwartz R. Algorithms for Efficient Near-Perfect Phylogenetic Tree Reconstruction in Theory and Practice. *IEEE/ACM Trans. Comput. Biol. Bioinformatics*. 2007;4:561-71. doi:10.1109/TCBB.2007.1070.
227. Stefansson CG. Map analyses of psychiatric services. The application of a computerized psychiatric case register to geographical analysis. *Acta Psychiatr Scand*. 1984;70:515-22.
228. Stevens VJ, Rossner J, Greenlick M, Stevens N, Frankel HM, Craddick S. Freedom from fat: a contemporary multi-component weight loss program for the general population of obese adults. *J Am Diet Assoc*. 1989;89:1254-8.
229. Sumner W2, Truszczynski M, Marek VW. A formal model of family medicine. *J Am Board Fam Pract*. 1996;9:41-52.
230. Sun K, Goncalves JP, Larminie C, Przulj N. Predicting disease associations via biological network analysis. *BMC Bioinformatics* 2014. doi:10.1186/1471-2105-15-304.
231. Swartz SH, Cowan TM, DePue J, Goldstein MG. Academic profiling of tobacco-related performance measures in primary care. *Nicotine Tob Res*. 2002;4 Suppl 1:S38-44. doi:10.1080/14622200210128018.
232. Syalim A, Nishide T, Sakurai K. Securing Provenance of Distributed Processes in an Untrusted Environment. *IEICE TRANSACTIONS ON INFORMATION AND SYSTEMS*. 2012;E95D:1894-907. doi:10.1587/transinf.E95.D.1894.
233. Szeto LK, Liew AW, Yan H, Tang S. Gene Expression Data Clustering and Visualization Based on a Binary Hierarchical Clustering Framework. In: Darlinghurst, Australia, Australia: Australian Computer Society, Inc; 2003. p. 145-152.
234. Taffe J, Dennerstein L. Menstrual diary data and menopausal transition: methodologic issues. *Acta Obstet Gynecol Scand*. 2002;81:588-94.
235. Techentin R, Foti D, Li P, Daniel E, Gilbert B, Holmes D, Al-Saffar S. Development of a Semi-synthetic Dataset as a Testbed for Big-Data Semantic Analytics. In: ; 2014. p. 252-253. doi:10.1109/ICSC.2014.45.
236. Tezcan B, Khazaezadeh N, Ash A, Oteng-Ntim E. Social disparity and intrauterine death: from politics to policies. *J Obstet Gynaecol*. 2011;31:507-8. doi:10.3109/01443615.2011.587910.
237. Tiikkaja S, Sandin S, Hultman CM, Modin B, Malki N, Sparen P. Psychiatric disorder and work life: A longitudinal study of intra-generational social mobility. *Int J Soc Psychiatry*. 2016;62:156-66. doi:10.1177/0020764015614594.
238. Toner JP, Coddington CC, Doody K, van Voorhis B, Seifer DB, Ball GD, et al. Society for Assisted Reproductive Technology and assisted reproductive technology in the United States: a 2016 update. *Fertil Steril*. 2016;106:541-6. doi:10.1016/j.fertnstert.2016.05.026.
239. Torkar S, Benedik P, Rajkovic U, Sustersic O, Rajkovic V. Design of a Recommendation System for Adding Support in the Treatment of Chronic Patients. *Stud Health Technol Inform*. 2016;225:879-80.
240. Troszynski M, Niemiec T, Wilczynska A. Assessment of three-level selective perinatal care based on the analysis of early perinatal death rates and cesarean sections in Poland in 2008. *Ginekol Pol*. 2009;80:670-7.
241. Truyen Tran, Dinh Phung, Luo W, Venkatesh S. Stabilized sparse ordinal regression for medical risk stratification. *KNOWLEDGE AND INFORMATION SYSTEMS*. 2015;43:555-82. doi:10.1007/s10115-014-0740-4.

242. Tukiendorf A. Cervix uteri cancer incidence in relation to ethnic situation in Opole province, Poland. *Cent Eur J Public Health*. 2002;10:88–92.
243. Ugon A, Philippe C, Pietrasz S, Ganascia J, Levy PP. OPTISAS a new method to analyse patients with Sleep Apnea Syndrome. *Stud Health Technol Inform*. 2008;136:547–52.
244. Valko M, Kveton B, Valizadegan H, Cooper GF, Hauskrecht M. Conditional Anomaly Detection with Soft Harmonic Functions. *Proc IEEE Int Conf Data Min*. 2011;2011:735–43. doi:10.1109/ICDM.2011.40.
245. Vallejo IL, Herrero HH, Sanz JJ, Martin JJ, Azarola EN. Diagnostic variability in a cohort of patients with multiple admissions in the last two decades. *ACTAS ESPANOLAS DE PSIQUIATRIA*. 2003;31:18–23.
246. Vani SN. Appropriate technologies for mother and child health care in developing countries. *Indian Pediatr*. 1989;26:1124–30.
247. Vilares M, Ribadas FJ, Graña J. Approximately Common Patterns in Shared-forests. In: New York, NY, USA: ACM; 2001. p. 73–80. doi:10.1145/502585.502599.
248. Voskoboinik A, Gutman MJ, Croagh D, Bell R, Saunder A, Gribbin J, Kanellis J. Implementation and learning of laproscopic donor nephrectomy by a non-transplant general surgeon with advanced laparoscopic skills. *Asian J Endosc Surg*. 2011;4:127–32. doi:10.1111/j.1758-5910.2011.00092.x.
249. Vossler DG, Am Haltiner, Schepp SK, Friel PA, Caylor LM, Morgan JD, Doherty MJ. Ictal stuttering - A sign suggestive of psychogenic nonepileptic seizures. *Neurology*. 2004;63:516–9. doi:10.1212/01.WNL.0000133208.57562.CB.
250. Vossler DG, Haltiner AM, Schepp SK, Friel PA, Caylor LM, Morgan JD, Doherty MJ. Ictal stuttering: a sign suggestive of psychogenic nonepileptic seizures. *Neurology*. 2004;63:516–9.
251. Vranken R, Coulombier D, Kenyon T, Koosimile B, Mavunga T, Coggin W, Binkin N. Use of a computerized tuberculosis register for automated generation of case finding, sputum conversion, and treatment outcome reports. *Int J Tuberc Lung Dis*. 2002;6:111–20.
252. Walley JD, McDonald M. Integration of mother and child health services in Ethiopia. *Trop Doct*. 1991;21:32–5. doi:10.1177/004947559102100113.
253. Wang Z, Chakraborty P, Mekaru SR, Brownstein JS, Ye J, Ramakrishnan N. Dynamic Poisson Autoregression for Influenza-Like-Illness Case Count Prediction. In: New York, NY, USA: ACM; 2015. p. 1285–1294. doi:10.1145/2783258.2783291.
254. Wang JT, Chirn G, Marr TG, Shapiro B, Shasha D, Zhang K. Combinatorial Pattern Discovery for Scientific Data: Some Preliminary Results. In: New York, NY, USA: ACM; 1994. p. 115–125. doi:10.1145/191839.191863.
255. Wang JT, Chirn G, Marr TG, Shapiro B, Shasha D, Zhang K. Combinatorial Pattern Discovery for Scientific Data: Some Preliminary Results. *SIGMOD Rec*. 1994;23:115–25. doi:10.1145/191843.191863.
256. Wang B, Lin C, Yang I. Constructing a Gene Team Tree in Almost  $O(N \lg N)$  Time. *IEEE/ACM Trans. Comput. Biol. Bioinformatics*. 2014;11:142–53. doi:10.1109/TCBB.2013.150.
257. Wang X, Wang F, Wang J, Qian B, Hu J. Exploring Patient Risk Groups with Incomplete Knowledge. In: ; 2013. p. 1223–1228. doi:10.1109/ICDM.2013.129.
258. Welch JL, Siek KA, Connelly KH, Astroth KS, McManus MS, Scott L, et al. Merging health literacy with computer technology: self-managing diet and fluid intake among adult hemodialysis patients. *Patient Educ Couns*. 2010;79:192–8. doi:10.1016/j.pec.2009.08.016.
259. White D, Choi H, Peloquin C, Zhu Y, Zhang Y. Secular trend of adhesive capsulitis. *Arthritis Care Res (Hoboken)*. 2011;63:1571–5. doi:10.1002/acr.20590.
260. Wilhelms J, van Gelder A. Octrees for Faster Isosurface Generation. *ACM Trans. Graph*. 1992;11:201–27. doi:10.1145/130881.130882.
261. Winter A, Brigl B, Funkat G, Haeber A, Heller O, Wendt T. 3LGM(2)-Modeling to support management of health information systems. *Int J Med Inform*. 2007;76:145–50. doi:10.1016/j.ijmedinf.2006.07.007.
262. Wongsuphasawat K, Gotz D. Exploring Flow, Factors, and Outcomes of Temporal Event Sequences with the Outflow Visualization. *IEEE Trans Vis Comput Graph*. 2012;18:2659–68. doi:10.1109/TVCG.2012.225.
263. Wu T, Moulton V, Steel M. Refining Phylogenetic Trees Given Additional Data: An Algorithm Based on Parsimony. *IEEE/ACM Trans. Comput. Biol. Bioinformatics*. 2009;6:118–25. doi:10.1109/TCBB.2008.100.
264. WU Y, Zhu X, Li L, Fan W, Jin R, Zhang X. Mining Dual Networks: Models, Algorithms, and Applications. *ACM Trans. Knowl. Discov. Data*. 2016;10:40:1. doi:10.1145/2785970.
265. Xie W, Wu J. Mining positive and negative weighted association rules in medical records without user-specified weights based on HITS model. In: ; 2010. p. 2325–2329. doi:10.1109/BMEI.2010.5639578.
266. Xie C, Yang P, Yang Y. Open Knowledge Accessing Method in IoT-based Hospital Information System for Medical Record Enrichment. *IEEE Access*. 2018;PP:1. doi:10.1109/ACCESS.2018.2810837.
267. Yamin A, Khan SA, Yasin UU. Automated system of hess screen for diagnosis of paralytic strabismus using computer aided diagnosis. In: ; 2013. p. 300–305. doi:10.1109/IST.2013.6729710.
268. Yoon S, Cohen B, Cato KD, Liu J, Larson EL. Visualization of Data Regarding Infections Using Eye Tracking Techniques. *J Nurs Scholarsh*. 2016;48:244–53. doi:10.1111/jnu.12204.
269. Yoon D, Park I, Schuemie MJ, Park MY, Kim JH, Park RW. A quantitative method for assessment of prescribing patterns using electronic health records. *PLoS One*. 2013;8:e75214. doi:10.1371/journal.pone.0075214.

270. Zamora M, Baradad M, Amado E, Cordero S, Limón E, Ribera J, et al. Characterizing chronic disease and polymedication prescription patterns from electronic health records. In: ; 2015. p. 1–9. doi:10.1109/DSAA.2015.7344870.
271. Zenios S. Information Technology in Health Care Systems: Barriers to Adoption. In: ; 2006. p. 52. doi:10.1109/ICCGI.2006.35.
272. Zhang H, Mehotra S, Liebovitz D, Gunter CA, Malin B. Mining Deviations from Patient Care Pathways via Electronic Medical Record System Audits. *ACM Trans. Manage. Inf. Syst.* 2013;4:17:1. doi:10.1145/2544102.
273. Zhang M, Zhang H, Tjandra D, Wong STC. DBMap: a space-conscious data visualization and knowledge discovery framework for biomedical data warehouse. *IEEE Transactions on Information Technology in Biomedicine.* 2004;8:343–53. doi:10.1109/TITB.2004.832550.
274. Zhao S. Mining Medical Causality for Diagnosis Assistance. In: New York, NY, USA: ACM; 2017. p. 841. doi:10.1145/3018661.3022752.
275. Zheng Z, Wan X. Graph-Based Multi-Modality Learning for Clinical Decision Support. In: New York, NY, USA: ACM; 2016. p. 1945–1948. doi:10.1145/2983323.2983880.
276. Zirkind G. Genetic Database Optimization: How Data Inspection and Consideration, Provides for Index Compression and Record Access Optimization of Genetic Databases. In: New York, NY, USA: ACM; 2006. p. 68–76. doi:10.1145/1125170.1125194.
277. ZWEIGENBAUM P. MENELAS - AN ACCESS SYSTEM FOR MEDICAL RECORDS USING NATURAL-LANGUAGE. *Comput Methods Programs Biomed.* 1994;45:117–20. doi:10.1016/0169-2607(94)90029-9.
278. Albarakati N, Obradovic Z. Disease-Based Clustering of Hospital Admission: Disease Network of Hospital Networks Approach. In: ; 2017. p. 636–641. doi:10.1109/CBMS.2017.87.
279. Andersen A. An implementation of secure multi-party computations to preserve privacy when processing EMR data. In: ; 2013. p. 381–384. doi:10.1109/PST.2013.6596096.
280. Andersen A. SNOOP: Privacy Preserving Middleware for Secure Multi-party Computations. In: New York, NY, USA: ACM; 2014. p. 8:1. doi:10.1145/2677017.2677025.
281. Andersen A, Yigzaw KY, Karlsen R. Privacy preserving health data processing. In: ; 2014. p. 225–230. doi:10.1109/HealthCom.2014.7001845.
282. Brunson JC, Laubenbacher RC. Applications of network analysis to routinely collected health care data: a systematic review. *JOURNAL OF THE AMERICAN MEDICAL INFORMATICS ASSOCIATION.* 2018;25:210–21. doi:10.1093/jamia/ocx052.
283. Chen J, Poon J, Poon SK, Xu L, Sze DMY. Mining Symptom-Herb Patterns from Patient Records Using Tripartite Graph. *Evid Based Complement Alternat Med.* 2015;2015:435085. doi:10.1155/2015/435085.
284. Finney JM, Walker AS, Peto TEA, Wyllie DH. An efficient record linkage scheme using graphical analysis for identifier error detection. *BMC Med Inform Decis Mak.* 2011;11:7. doi:10.1186/1472-6947-11-7.
285. Goodwin TR, Harabagiu SM. Medical Question Answering for Clinical Decision Support. *Proc ACM Int Conf Inf Knowl Manag.* 2016;2016:297–306. doi:10.1145/2983323.2983819.
286. Goodwin TR, Harabagiu SM. Knowledge Representations and Inference Techniques for Medical Question Answering. *ACM TRANSACTIONS ON INTELLIGENT SYSTEMS AND TECHNOLOGY* 2018. doi:10.1145/3106745.
287. Hanzlicek P, Spidlen J, Heroutova H, Nagy M. User interface of MUDR electronic health record. *Int J Med Inform.* 2005;74:221–7. doi:10.1016/j.ijmedinf.2004.06.003.
288. Herskovic JR, Subramanian D, Cohen T, Bozzo-Silva PA, Bearden CF, Bernstam EV. Graph-based signal integration for high-throughput phenotyping. *BMC Bioinformatics.* 2012;13 Suppl 13:S2. doi:10.1186/1471-2105-13-S13-S2.
289. Honglan L, Xiaona Q, Bin F. The Symptoms and Pathogenesis Entity Recognition of TCM Medical Records Based on CRF. In: ; 2015. p. 1479–1484. doi:10.1109/UIC-ATC-ScalCom-CBDCom-loP.2015.267.
290. Huet B, Artigou JY, Poirier J, Blain G. Meta-modelling: the appropriate solution for a family of applications. *Stud Health Technol Inform.* 2001;84:623–7.
291. Huet B, Pourriat JL, Martin J, Cupa M. An automaton computer program for a microcomputerized real-time (thesaurus based) abstract medical record. *Comput Programs Biomed.* 1982;15:117–23.
292. Jeunemaitre X, Degoulet P, Morice V, Chatellier G, Devries C, Plouin PF, et al. Testing an expert system for hypertension. *Arch Mal Coeur Vaiss.* 1986;79:808–12.
293. Ji X, Ae Chun S, Geller J. Predicting Comorbid Conditions and Trajectories using Social Health Records. *IEEE Trans Nanobioscience* 2016. doi:10.1109/TNB.2016.2564299.
294. Kavuluru R, Han S, Harris D. Unsupervised Extraction of Diagnosis Codes from EMRs Using Knowledge-Based and Extractive Text Summarization Techniques. *Adv Artif Intell (2013).* 2013;7884:77–88. doi:10.1007/978-3-642-38457-8\_7.
295. Kerschberger B, Hilderbrand K, Boulle AM, Coetzee D, Goemaere E, Azevedo V de, van Cutsem G. The effect of complete integration of HIV and TB services on time to initiation of antiretroviral therapy: a before-after study. *PLoS One.* 2012;7:e46988. doi:10.1371/journal.pone.0046988.
296. Koopman B. Semantic Search As Inference: Applications in Health Informatics. *SIGIR Forum.* 2014;48:116–7. doi:10.1145/2701583.2701601.
297. Koopman B, Zuccon G, Bruza P, Sitbon L, Lawley M. Graph-based Concept Weighting for Medical Information Retrieval. In: New York, NY, USA: ACM; 2012. p. 80–87. doi:10.1145/2407085.2407096.

298. Mondal S, Mukherjee N. Mobile-assisted remote healthcare delivery. In: ; 2016. p. 630–635. doi:10.1109/PDGC.2016.7913199.
299. Monsen KA, Banerjee A, Das P. Discovering client and intervention patterns in home visiting data. *West J Nurs Res.* 2010;32:1031–54. doi:10.1177/0193945910370970.
300. Muller R, Serfl M, Nauwerth U, Schoppe D, Pommerening K, Dittrich HM. THEMPO: a knowledge-based system for therapy planning in pediatric oncology. *Comput Biol Med.* 1997;27:177–200.
301. Ni J, Fei H, Fan W, Zhang X. Automated Medical Diagnosis by Ranking Clusters Across the Symptom–Disease Network. In: ; 2017. p. 1009–1014. doi:10.1109/ICDM.2017.130.
302. O'Neil M, Payne C, Read J. Read Codes Version 3: a user led terminology. *Methods Inf Med.* 1995;34:187–92.
303. Pietrzyk PM. Free text analysis. *Int J Biomed Comput.* 1995;39:139–44.
304. Săcăreă C, Șotropa D, Troancă D. Symptoms investigation by means of formal concept analysis for enhancing medical diagnoses. In: ; 2017. p. 1–5. doi:10.23919/SOFTCOM.2017.8115588.
305. Soulakis ND, Carson MB, Lee YJ, Schneider DH, Skeehan CT, Scholtens DM. Visualizing collaborative electronic health record usage for hospitalized patients with heart failure. *J Am Med Inform Assoc.* 2015;22:299–311. doi:10.1093/jamia/ocu017.
306. Zhang Z, Wang H, Wang C, Fang H. Cluster-based Epidemic Control Through Smartphone-based Body Area Networks. *IEEE Trans Parallel Distrib Syst.* 2015;26:681–90. doi:10.1109/TPDS.2014.2313331.
307. Adamusiak T, Shimoyama N, Shimoyama M. Next generation phenotyping using the unified medical language system. *JMIR Med Inform.* 2014;2:e5. doi:10.2196/medinform.3172.
308. Alvarez JM, Polo L, Jimenez W, Abella P, Labra JE. Application of the Spreading Activation Technique for Recommending Concepts of Well-known Ontologies in Medical Systems. In: New York, NY, USA: ACM; 2011. p. 626–635. doi:10.1145/2147805.2147913.
309. Antonakakis M, Dimitriadis SI, Zervakis M, Micheloyannis S, Rezaie R, Babajani-Feremi A, et al. Altered cross-frequency coupling in resting-state MEG after mild traumatic brain injury. *Int J Psychophysiol.* 2016;102:1–11. doi:10.1016/j.ijpsycho.2016.02.002.
310. Arantes WMd, Verdier C. Public health alert system for health networks: application to cardiology. In: ; 2005. p. 151–154. doi:10.1109/CIC.2005.1588057.
311. Athreya AP, Ngiam KY, Luo Z, Tai ES, Kalbarczyk Z, Iyer RK. Towards Longitudinal Analysis of a Population's Electronic Health Records Using Factor Graphs. In: ; 2016. p. 79–86.
312. Dhulekar N, Oztan B, Yener B, Bingol HO, Irim G, Aktekin B, Aykut-Bingöl C. Graph-theoretic Analysis of Epileptic Seizures on Scalp EEG Recordings. In: New York, NY, USA: ACM; 2014. p. 155–163. doi:10.1145/2649387.2649423.
313. Frazier GF. An Incremental Algorithm for Building Temporal Quadrees. In: New York, NY, USA: ACM; 1993. p. 446–452. doi:10.1145/170791.170896.
314. Gerson CD, Gerson M. Technical report: an ePRO patient reported outcome program for the evaluation of patients with irritable bowel syndrome. *Neurogastroenterol Motil.* 2014;26:290–4. doi:10.1111/nmo.12255.
315. Ghosh P, Kalyanaraman A. A Fast Sketch-based Assembler for Genomes. In: New York, NY, USA: ACM; 2016. p. 241–250. doi:10.1145/2975167.2975192.
316. Gopakumar S, Tran T, Nguyen TD, Phung D, Venkatesh S. Stabilizing high-dimensional prediction models using feature graphs. *IEEE J Biomed Health Inform.* 2015;19:1044–52. doi:10.1109/JBHI.2014.2353031.
317. Heer J, Perer A. Orion: A system for modeling, transformation and visualization of multidimensional heterogeneous networks. *INFORMATION VISUALIZATION.* 2014;13:111–33. doi:10.1177/1473871612462152.
318. Jing X, Cimino JJ. A complementary graphical method for reducing and analyzing large data sets. Case studies demonstrating thresholds setting and selection. *Methods Inf Med.* 2014;53:173–85. doi:10.3414/ME13-01-0075.
319. Jupin J, Shi JY. Identity Tracking in Big Data: Preliminary Research Using In-Memory Data Graph Models for Record Linkage and Probabilistic Signature Hashing for Approximate String Matching in Big Health and Human Services Databases. In: New York, NY, USA: ACM; 2014. p. 20:1. doi:10.1145/2640087.2644170.
320. Lieberman MD, Taheri S, Guo w, Mirrashed F, Yahav I, Aris A, Shneiderman B. Visual Exploration Across Biomedical Databases. *IEEE/ACM Trans. Comput. Biol. Bioinformatics.* 2011;8:536–50. doi:10.1109/TCBB.2010.1.
321. Luz S, Kane B. Classification of Patient Case Discussions Through Analysis of Vocalisation Graphs. In: New York, NY, USA: ACM; 2009. p. 107–114. doi:10.1145/1647314.1647334.
322. Mattson DC, Yang J. The Child Therapy Tracking System (CTTS): A model for an expressive therapy electronic health record (EHR). *ARTS IN PSYCHOTHERAPY.* 2013;40:509–18. doi:10.1016/j.aip.2013.08.002.
323. Muller R. The CliniCon framework for context representation in electronic patient records. *JOURNAL OF THE AMERICAN MEDICAL INFORMATICS ASSOCIATION.* 1997:178–82.
324. Noren GN, Hopstadius J, Bate A, Star K, Edwards IR. Temporal pattern discovery in longitudinal electronic patient records. *DATA MINING AND KNOWLEDGE DISCOVERY.* 2010;20:361–87. doi:10.1007/s10618-009-0152-3.
325. Nose Y, Akazawa K, Watanabe Y, Yokota M, Okamura S, Maehara Y, Sugimachi K. Cancer registration using case history database in hospital information system. *Jpn Hosp.* 1988;7:21–8.
326. Ogushi Y, Haruki Y, Okada Y, Takahashi M, Shimizu M, Izumi Y, et al. Development and evaluation of regional health database systems. *Stud Health Technol Inform.* 1998;52 Pt 2:1297–300.

327. Oladimeji EA, Chung L, Jung HT, Kim J. Managing Security and Privacy in Ubiquitous eHealth Information Interchange. In: New York, NY, USA: ACM; 2011. p. 26:1. doi:10.1145/1968613.1968645.
328. Onimura N, Yamashita T, Nakayama N, Soejima H, Hirokawa S. Generation of Sentence Template Graph from SOAP Format Medical Documents. In: ; 2016. p. 159–162. doi:10.1109/CSCI.2016.0037.
329. Oshiro T, Oshiro H, Tanimizu M. Effective methods of organizing complex information in advanced cancer patients. *Gan To Kagaku Ryoho*. 2014;41 Suppl 1:26–9.
330. Osop H, Sahama T. Electronic health records: Improvement to healthcare decision-making. In: ; 2016. p. 1–6. doi:10.1109/HealthCom.2016.7749474.
331. Poscia R, Ghio S, D'Alto M, Vitulo P, Mule M, Albera C, et al. 'Real-life' information on pulmonary arterial hypertension: the iPHnet Project. *Curr Med Res Opin*. 2014;30:2409–14. doi:10.1185/03007995.2014.960514.
332. Staubert S, Schaaf M, Jahn F, Brandner R, Winter A. Modeling Interoperable Information Systems with 3LGM(2) and IHE. *Methods Inf Med*. 2015;54:398–405. doi:10.3414/ME14-02-0027.
333. Techentin R, Sauver JS, Huddleston J, Gilbert B, Holmes D. Lessons learned from the semantic translation of healthcare data. In: ; 2014. p. 513–518. doi:10.1109/HealthCom.2014.7001895.
334. Whyatt CP, Torres EB. The Social-dance: Decomposing Naturalistic Dyadic Interaction Dynamics to the 'Micro-level'. In: New York, NY, USA: ACM; 2017. p. 24:1. doi:10.1145/3077981.3078055.
