# Supplementary material for: Graph-Representation of Patient Data: a Systematic Literature Review
Source: Springer Nature journal article supplement (doi:10.1007/s10916-020-1538-4), 2020-03-12
Supplement: MOESM7 [file 17793162]

**Title:** Graph-Representation of Patient Data  
A Systematic Literature Review

**Journal:** Journal of Medical Systems

**Authors:**

Jens Schrodtt, [jens.schrodtt@med.uni-heidelberg.de](mailto:jens.schrodtt@med.uni-heidelberg.de) Universitätsklinikum Heidelberg Institut für Medizinische Biometrie und Informatik, Im Neuenheimer Feld 130.3, 69120 Heidelberg, Germany, orcid: 0000-0002-9768-4781

Aleksei Dudchenko, [Aleksei.Dudchenko@med.uni-heidelberg.de](mailto:Aleksei.Dudchenko@med.uni-heidelberg.de) Universitätsklinikum Heidelberg Institut für Medizinische Biometrie und Informatik, Im Neuenheimer Feld 130.3, 69120 Heidelberg, Germany

Petra Knaup, [petra.knaup@med.uni-heidelberg.de](mailto:petra.knaup@med.uni-heidelberg.de) Universitätsklinikum Heidelberg Institut für Medizinische Biometrie und Informatik, Im Neuenheimer Feld 130.3, 69120 Heidelberg, Germany

Matthias Ganzinger, [matthias.ganzinger@med.uni-heidelberg.de](mailto:matthias.ganzinger@med.uni-heidelberg.de) Universitätsklinikum Heidelberg Institut für Medizinische Biometrie und Informatik, Im Neuenheimer Feld 130.3, 69120 Heidelberg, Germany

**Suppl. Table 5:** list of all investigated papers

| Year | Title                                                                                                                                                            | Author, editor or organization                                                                                                                                                                                                                                                                                                                                                                                                                  | Ref. |
|------|------------------------------------------------------------------------------------------------------------------------------------------------------------------|-------------------------------------------------------------------------------------------------------------------------------------------------------------------------------------------------------------------------------------------------------------------------------------------------------------------------------------------------------------------------------------------------------------------------------------------------|------|
| 1992 | Abbs v. Sullivan                                                                                                                                                 |                                                                                                                                                                                                                                                                                                                                                                                                                                                 | [1]  |
| 2014 | Next generation phenotyping using the unified medical language system                                                                                            | Adamusiak, Tomasz; Shimoyama, Naoki; Shimoyama, Mary                                                                                                                                                                                                                                                                                                                                                                                            | [2]  |
| 2001 | Diagnostic predictors of complications and survival after renal transplantation in cats                                                                          | Adin, C. A.; Gregory, C. R.; Kyles, A. E.; Cowgill, L.                                                                                                                                                                                                                                                                                                                                                                                          | [3]  |
| 2014 | Use of two-part regression calibration model to correct for measurement error in episodically consumed foods in a single-replicate study design: EPIC case study | Agogo, George O.; van der Voet, Hilko; van't Veer, Pieter; Ferrari, Pietro; Leenders, Max; Muller, David C.; Sanchez-Cantalejo, Emilio; Bamia, Christina; Braaten, Tonje; Knuppel, Sven; Johansson, Ingegerd; van Eeuwijk, Fred A.; Boshuizen, Hendriek                                                                                                                                                                                         | [4]  |
| 2017 | Disease-Based Clustering of Hospital Admission: Disease Network of Hospital Networks Approach                                                                    | Albarakati, N.; Obradovic, Z.                                                                                                                                                                                                                                                                                                                                                                                                                   | [5]  |
| 2005 | A New Distance for High Level RNA Secondary Structure Comparison                                                                                                 | Allali, Julien; Sagot, Marie-France                                                                                                                                                                                                                                                                                                                                                                                                             | [6]  |
| 2011 | Application of the Spreading Activation Technique for Recommending Concepts of Well-known Ontologies in Medical Systems                                          | Alvarez, Jose Mar\`ia; Polo, Luis; Jimenez, Weena; Abella, Pablo; Labra, Jose Emilio                                                                                                                                                                                                                                                                                                                                                            | [7]  |
| 2014 | The origin of regional failure in oral cavity squamous cell carcinoma with pathologically negative neck metastases                                               | Amit, Moran; Yen, Tzu Chen; Liao, Chun Ta; Chaturvedi, Pankaj; Agarwal, Jai Prakash; Kowalski, Luiz Paulo; Kohler, Hugo F.; Ebrahimi, Ardan; Clark, Jonathan R.; Cernea, Claudio Roberto; Brandao, Jose S.; Kreppel, Matthias; Zoller, Joachim E.; Leider-Trejo, Leonor; Bachar, Gideon; Shpitzer, Thomas; Bolzoni, Andrea Villaret; Patel, Raj P.; Jonnalagadda, Sashikanth; Robbins, Thomas Kevin; Shah, Jatin P.; Patel, Snehal G.; Gil, Ziv | [8]  |

|      |                                                                                                                                                                                               |                                                                                                                                                                              |      |
|------|-----------------------------------------------------------------------------------------------------------------------------------------------------------------------------------------------|------------------------------------------------------------------------------------------------------------------------------------------------------------------------------|------|
| 2013 | An implementation of secure multi-party computations to preserve privacy when processing EMR data                                                                                             | Andersen, A.                                                                                                                                                                 | [9]  |
| 2014 | SNOOP: Privacy Preserving Middleware for Secure Multi-party Computations                                                                                                                      | Andersen, Anders                                                                                                                                                             | [10] |
| 2014 | Privacy preserving health data processing                                                                                                                                                     | Andersen, A.; Yigzaw, K. Y.; Karlsen, R.                                                                                                                                     | [11] |
| 2017 | Adherence to guidelines and breast cancer patients survival: a population-based cohort study analyzed with a causal inference approach                                                        | Andreano, Anita; Rebora, Paola; Valsecchi, Maria Grazia; Russo, Antonio Giampiero                                                                                            | [12] |
| 2017 | Building a Dossier on the Cheap: Integrating Distributed Personal Data Resources Under Cost Constraints                                                                                       | Anindya, Imrul Chowdhury; Roy, Harichandan; Kantarcioglu, Murat; Malin, Bradley                                                                                              | [13] |
| 2010 | Integrating image and text information for biomedical information retrieval                                                                                                                   | Antani, S.                                                                                                                                                                   | [14] |
| 2016 | Altered cross-frequency coupling in resting-state MEG after mild traumatic brain injury                                                                                                       | Antonakakis, Marios; Dimitriadis, Stavros I.; Zervakis, Michalis; Micheloyannis, Sifis; Rezaie, Roozbeh; Babajani-Feremi, Abbas; Zouridakis, George; Papanicolaou, Andrew C. | [15] |
| 2011 | Data Mining of Audiology Patient Records: Factors Influencing the Choice of Hearing Aid Type                                                                                                  | Anwar, Muhammad Naveed; Oakes, Michael Philip                                                                                                                                | [16] |
| 2012 | Data mining of audiology patient records: factors influencing the choice of hearing aid type                                                                                                  | Anwar, Muhammad N.; Oakes, Michael P.                                                                                                                                        | [17] |
| 2005 | Public health alert system for health networks: application to cardiology                                                                                                                     | Arantes, W. Manzi de; Verdier, C.                                                                                                                                            | [18] |
| 2015 | Kidnew: The Kidney Transplant Patient Personal Health Buddy                                                                                                                                   | Arcilla, Mary Jane B.; Ang, Viana Celina T.; Ochoa, Mikaela Nazarene; Padua, Christian Paulo L.; Payawal, Riezl E.                                                           | [19] |
| 2016 | Towards Longitudinal Analysis of a Population's Electronic Health Records Using Factor Graphs                                                                                                 | Athreya, A. P.; Ngiam, K. Y.; Luo, Z.; Tai, E. S.; Kalbarczyk, Z.; Iyer, R. K.                                                                                               | [20] |
| 2007 | GRAFIP: A FRAMEWORK FOR THE REPRESENTATION OF HEALTHY AND PATHOLOGICAL CEREBRAL INFORMATION                                                                                                   | Atif, J.; Hudelot, C.; Nempont, O.; Richard, N.; Batrancourt, B.; Angelini, E.; Bloch, I.                                                                                    | [21] |
| 2015 | Impact of the Mobile HealthPROMISE Platform on the Quality of Care and Quality of Life in Patients With Inflammatory Bowel Disease: Study Protocol of a Pragmatic Randomized Controlled Trial | Atreja, Ashish; Khan, Sameer; Rogers, Jason D.; Otobo, Emamuzo; Patel, Nishant P.; Ullman, Thomas; Colombel, Jean Fred; Moore, Shirley; Sands, Bruce E.                      | [22] |
| 2014 | A quality improvement study to improve inpatient problem list use                                                                                                                             | Bakel, Leigh Anne; Wilson, Karen; Tyler, Amy; Tham, Eric; Reese, Jennifer; Bothner, Joan; Kaplan, David W.                                                                   | [23] |
| 2007 | Analgesic quality in a postoperative pain service: continuous assessment with the cumulative sum (cusum) method                                                                               | Baptista Macaroff, W. M.; Castroman Espasandin, P.                                                                                                                           | [24] |
| 2008 | A Graph Approach to the Threshold All-against-all Substring Matching Problem                                                                                                                  | Barsky, Marina; Stege, Ulrike; Thomo, Alex; Upton, Chris                                                                                                                     | [25] |
| 2010 | Cancer survival as a function of age at diagnosis: a study of the Surveillance, Epidemiology and End Results database                                                                         | Bassily, Mena N.; Wilson, Richard; Pompei, Francesco; Burmistrov, Dimitriy                                                                                                   | [26] |
| 2008 | Representing health, disorder and their transitions by digraphs                                                                                                                               | Bassoe, Carl-Fredrik                                                                                                                                                         | [27] |
| 1992 | NATURAL-LANGUAGE PROCESSING AND SEMANTICAL REPRESENTATION OF MEDICAL TEXTS                                                                                                                    | Baud, R. H.; Am RASSINOX; SCHERRER, [JR]                                                                                                                                     | [28] |
| 1995 | REPRESENTING CLINICAL NARRATIVES USING CONCEPTUAL GRAPHS                                                                                                                                      | Baud, R. H.; Am RASSINOX; WAGNER, J. C.; Lovis, C.; JUGE, C.; ALPAY, L. L.; Michel, P. A.; Degoulet, P.; SCHERRER, [JR]                                                      | [29] |
| 1992 | Natural language processing and semantical representation of medical texts                                                                                                                    | Baud, R. H.; Rassinoux, A. M.; Scherrer, J. R.                                                                                                                               | [30] |
| 2017 | Knowledge graph prediction of unknown adverse drug reactions and validation in electronic health records                                                                                      | Bean, Daniel M.; Wu, Honghan; Iqbal, Ehtesham; Dzahini, Olubanke; Ibrahim, Zina M.; Broadbent, Matthew; Stewart, Robert; Dobson, Richard J. B.                               | [31] |
| 2018 | Author Correction: Knowledge graph prediction of unknown adverse drug reactions and validation in electronic health records                                                                   | Bean, Daniel M.; Wu, Honghan; Iqbal, Ehtesham; Dzahini, Olubanke; Ibrahim, Zina M.; Broadbent, Matthew; Stewart, Robert; Dobson, Richard J. B.                               | [32] |

|      |                                                                                                                                                             |                                                                                                                                 |      |
|------|-------------------------------------------------------------------------------------------------------------------------------------------------------------|---------------------------------------------------------------------------------------------------------------------------------|------|
| 1974 | Computer-based hypertension clinic records: a co-operative study                                                                                            | Beilin, L. J.; Bulpitt, C. J.; Coles, E. C.; Dollery, C. T.; Johnson, B. F.; Mearns, C.; Munro-Faure, A. D.; Turner, S. C.      | [33] |
| 2004 | Is time-slice analysis superior to total hospital length of stay in demonstrating the effectiveness of a month-long intensive effort on a medicine service? | Bellin, Eran; Kalkut, Gary                                                                                                      | [34] |
| 2014 | Toward the design of a nursing ontology system                                                                                                              | Benedik, Peter; Rajkovic, Uros; Sustersic, Olga                                                                                 | [35] |
| 2007 | Phylogenetic Networks Based on the Molecular Clock Hypothesis                                                                                               | Bereg, Sergey; Zhang, Yuanyi                                                                                                    | [36] |
| 1995 | The compositional approach for representing medical concept systems                                                                                         | Bernauer, J.; Franz, M.; Schoop, D.; Schoop, M.; Pretschner, D. P.                                                              | [37] |
| 2005 | Topological Rearrangements and Local Search Method for Tandem Duplication Trees                                                                             | Bertrand, Denis; Gascuel, Olivier                                                                                               | [38] |
| 1997 | Computerized patient records benefit physician offices                                                                                                      | Bingham, A.                                                                                                                     | [39] |
| 2016 | Requirements for the formal representation of pathophysiology mechanisms by clinicians                                                                      | Bono, B. de; Helvensteijn, M.; Kokash, N.; Martorelli, I.; Sarwar, D.; Islam, S.; Grenon, P.; Hunter, P.                        | [40] |
| 2009 | Consistency of Topological Moves Based on the Balanced Minimum Evolution Principle of Phylogenetic Inference                                                | Bordewich, Magnus; Gascuel, Olivier; Huber, Katharina T.; Moulton, Vincent                                                      | [41] |
| 2012 | Tables or bar graphs? Presenting test results in electronic medical records                                                                                 | Brewer, Noel T.; Gilkey, Melissa B.; Lillie, Sarah E.; Hesse, Bradford W.; Sheridan, Stacey L.                                  | [42] |
| 2009 | Usability testing finds problems for novice users of pediatric portals                                                                                      | Britto, Maria T.; Jimison, Holly B.; Munafo, Jennifer Knopf; Wissman, Jennifer; Rogers, Michelle L.; Hersh, William             | [43] |
| 2004 | Constructing Chromosome Scale Suffix Trees                                                                                                                  | Brown, A. L.                                                                                                                    | [44] |
| 2018 | Applications of network analysis to routinely collected health care data: a systematic review                                                               | Brunson, Jason Cory; Laubenbacher, Reinhard C.                                                                                  | [45] |
| 2004 | Presentation of medical guidelines on a computer                                                                                                            | Buchtela, David; Anger, Zdenek; Peleska, Jan; Vesely, Arnost; Zvarova, Jana                                                     | [46] |
| 2002 | Integrated visualization of problemcentric urologic patient records                                                                                         | Bui, Aleex A. T.; Taira, Ricky K.; Churchill, Bernard; Kangaroo, Hooshang                                                       | [47] |
| 1986 | Use of the labor graph in Malawi                                                                                                                            | Burgess, H. A.                                                                                                                  | [48] |
| 1997 | Practical use of computerized hospital information systems to improve blood transfusion                                                                     | Butch, S. H.                                                                                                                    | [49] |
| 1994 | A LOGICAL FOUNDATION FOR REPRESENTATION OF CLINICAL-DATA                                                                                                    | CAMPBELL, K. E.; DAS, A. K.; MUSEN, M. A.                                                                                       | [50] |
| 2015 | An alternative database approach for management of SNOMED CT and improved patient data queries                                                              | Campbell, W. Scott; Pedersen, Jay; McClay, James C.; Rao, Praveen; Bastola, Dhundy; Campbell, James R.                          | [51] |
| 1982 | Legal abortion: the public health record                                                                                                                    | Cates, W. [JR]                                                                                                                  | [52] |
| 2009 | Ranking Weblogs by Analyzing Reading and Commenting Activities                                                                                              | Cen, Songxiang; Han, Li; Ma, Jian                                                                                               | [53] |
| 2018 | Non-AIDS complexity amongst patients living with HIV in Sydney: risk factors and health outcomes                                                            | Chan, Derek J.; Furner, Virginia; Smith, Don E.; Dronavalli, Mithilesh; Bopage, Rohan I.; Post, Jeffrey J.; Bhardwaj, Anjali K. | [54] |
| 2008 | Technical Perspective: Finding a Good Neighbor, Near and Fast                                                                                               | Chazelle, Bernard                                                                                                               | [55] |
| 2016 | Mining Health Examination Records #x2014;A Graph-Based Approach                                                                                             | Chen, L.; Li, X.; Sheng, Q. Z.; Peng, W. C.; Bennett, J.; Hu, H. Y.; Huang, N.                                                  | [56] |
| 2015 | Mining Symptom-Herb Patterns from Patient Records Using Tripartite Graph                                                                                    | Chen, Jinpeng; Poon, Josiah; Poon, Simon K.; Xu, Ling; Sze, Daniel M. Y.                                                        | [57] |
| 2014 | Patterns and trends with cancer incidence and mortality rates reported by the China National Cancer Registry                                                | Chen, Peng-Lai; Zhao, Ting; Feng, Rui; Chai, Jing; Tong, Gui-Xian; Wang, De-Bin                                                 | [58] |
| 2015 | Predictive analytics on Electronic Health Records (EHRs) using Hadoop and Hive                                                                              | Chennamsetty, H.; Chalasani, S.; Riley, D.                                                                                      | [59] |
| 2017 | GRAM: Graph-based Attention Model for Healthcare Representation Learning                                                                                    | Choi, Edward; Bahadori, Mohammad Taha; Le Song; Stewart, Walter F.; Sun, Jimeng                                                 | [60] |
| 2013 | A Transcript Perspective on Evolution                                                                                                                       | Christinat, Yann; Moret, Bernard M. E.                                                                                          | [61] |

|      |                                                                                                                                                                         |                                                                                                                                                                                  |      |
|------|-------------------------------------------------------------------------------------------------------------------------------------------------------------------------|----------------------------------------------------------------------------------------------------------------------------------------------------------------------------------|------|
| 2014 | Observation charts with overlapping blood pressure and heart rate graphs do not yield the performance advantage that health professionals assume: an experimental study | Christofidis, Melany J.; Hill, Andrew; Horswill, Mark S.; Watson, Marcus O.                                                                                                      | [62] |
| 2011 | Post-treatment (1)(8)FFDG maximum standardized uptake value as a prognostic marker of recurrence in endometrial carcinoma                                               | Chung, Hyun Hoon; Kim, Jae Weon; Kang, Keon Wook; Park, Noh-Hyun; Song, Yong-Sang; Chung, June-Key; Kang, Soon-Beom                                                              | [63] |
| 1994 | Knowledge-based approaches to the maintenance of a large controlled medical terminology                                                                                 | Cimino, J. J.; Clayton, P. D.; Hripcsak, G.; Johnson, S. B.                                                                                                                      | [64] |
| 2011 | Patterns and effects of missing comorbidity data for patients starting renal replacement therapy in England, Wales and Northern Ireland                                 | Collier, Timothy; Steenkamp, Retha; Tomson, Charlie; Caskey, Fergus; Ansell, David; Roderick, Paul; Nitsch, Dorothea                                                             | [65] |
| 2017 | Using formal methods for content validation of medical procedure documents                                                                                              | Cota, Erika; Ribeiro, Leila; Bezerra, Jonas Santos; Costa, Andrei; da Silva, Rosiana Estefane; Cota, Glaucia                                                                     | [66] |
| 2012 | Steganography and data hiding in flash video (FLV)                                                                                                                      | Cruz, J. P.; Libatique, N. J.; Tangonan, G.                                                                                                                                      | [67] |
| 2017 | Visual Verification of Cancer Staging for Therapy Decision Support                                                                                                      | Cypko, M. A.; Wojdziak, J.; Stoehr, M.; Kirchner, B.; Preim, B.; Dietz, A.; Lemke, H. U.; Oeltze-Jafra, S.                                                                       | [68] |
| 2015 | Influence Diagram As a Support Tool for Clinical Decisions In Cardiopulmonary And Metabolic Rehabilitation                                                              | da Silva Klahr, Patricia; Correa Coronel, Christian; Cabral Robinson, Caroline; Fonseca, Joao Marcelo; Dias Flores, Cecilia; Della Mea Plentz, Rodrigo                           | [69] |
| 2015 | A grammar-based approach to model the patient's clinical trajectory after a mild traumatic brain injury                                                                 | Dabek, F.; Caban, J. J.                                                                                                                                                          | [70] |
| 2015 | Visualization of Longitudinal Clinical Trajectories Using a Graph-based Approach                                                                                        | Dabek, Filip; Chen, Jian; Garbarino, Alexander; Caban, Jesus J.                                                                                                                  | [71] |
| 2008 | Personal data and confidentiality on the Internet                                                                                                                       | Dahl, Mads Ronald; Vedsted, Peter                                                                                                                                                | [72] |
| 2013 | Observational data for comparative effectiveness research: An emulation of randomised trials of statins and primary prevention of coronary heart disease                | Danaei, Goodarz; Garcia Rodriguez, Luis A.; Fernandez Cantero, Oscar; Logan, Roger; Hernan, Miguel A.                                                                            | [73] |
| 2017 | Automated clinical diagnosis: The role of content in various sections of a clinical document                                                                            | Datla, V.; Hasan, S. A.; Qadir, A.; Lee, K.; Ling, Y.; Liu, J.; Farri, O.                                                                                                        | [74] |
| 2011 | Body mass index and weight-for-length ratio references for infants born at 33-42 weeks gestation: a new tool for anthropometric assessment                              | Davidson, Shmuel; Natan, Dafna; Novikov, Ilya; Sokolover, Nir; Erlich, Avi; Shamir, Raanan                                                                                       | [75] |
| 2012 | A Characterization of the Set of Species Trees That Produce Anomalous Ranked Gene Trees                                                                                 | Degnan, James H.; Rosenberg, Noah A.; Stadler, Tanja                                                                                                                             | [76] |
| 1982 | A problem-oriented approach to journal selection for hospital libraries                                                                                                 | Delman, B. S.                                                                                                                                                                    | [77] |
| 2002 | Development and evaluation of patient-centered software for a weight-management clinic                                                                                  | Dent, R. M.; Penwarden, R. M.; Harris, N.; Hotz, S. B.                                                                                                                           | [78] |
| 2014 | Graph-theoretic Analysis of Epileptic Seizures on Scalp EEG Recordings                                                                                                  | Dhulekar, Nimit; Oztan, Basak; Yener, Bülent; Bingol, Haluk O.; Irim, Gulcin; Aktekin, Berrin; Aykut-Bingöl, Canan                                                               | [79] |
| 2015 | The transverse diameter of the chest on routine radiographs reliably estimates gestational age and weight in premature infants                                          | Dietz, Kelly R.; Zhang, Lei; Seidel, Frank G.                                                                                                                                    | [80] |
| 1985 | A microcomputer monitoring and data-acquisition system for intensive care units                                                                                         | Diprose, G. K.; Evans, D. H.; Levene, M. I.                                                                                                                                      | [81] |
| 2007 | Design and evaluation of a temporal, graph-based language for querying collections of patient histories                                                                 | Edsberg, Ole; Nordbo, Stein Jakob; Vinnes, Erik; Nytro, Oystein                                                                                                                  | [82] |
| 2016 | User acceptance of observation and response charts with a track and trigger system: a multisite staff survey                                                            | Elliott, Doug; Allen, Emily; McKinley, Sharon; Perry, Lin; Duffield, Christine; Fry, Margaret; Gallagher, Robyn; Iedema, Rick; Roche, Michael                                    | [83] |
| 2010 | NORDCAN--a Nordic tool for cancer information, planning, quality control and research                                                                                   | Engholm, Gerda; Ferlay, Jacques; Christensen, Niels; Bray, Freddie; Gjerstorff, Marianne L.; Klint, Asa; Kotlum, Joanis E.; Olafsdottir, Elinborg; Pukkala, Eero; Storm, Hans H. | [84] |

|      |                                                                                                                                                                                      |                                                                                                                                                                                                                                                                                     |       |
|------|--------------------------------------------------------------------------------------------------------------------------------------------------------------------------------------|-------------------------------------------------------------------------------------------------------------------------------------------------------------------------------------------------------------------------------------------------------------------------------------|-------|
| 2008 | Animal-related injuries: a population-based study of a five-state region in the upper Midwest: Regional Rural Injury Study II                                                        | Erkal, Sibel; Gerberich, Susan Goodwin; Ryan, Andrew D.; Renier, Colleen M.; Alexander, Bruce H.                                                                                                                                                                                    | [85]  |
| 2015 | Predicting Sequences of Clinical Events by Using a Personalized Temporal Latent Embedding Model                                                                                      | Esteban, C.; Schmidt, D.; Krompaß, D.; Tresp, V.                                                                                                                                                                                                                                    | [86]  |
| 2017 | Road traffic noise and registry based use of sleep medication                                                                                                                        | Evandt, Jorunn; Oftedal, Bente; Krog, Norun Hjertager; Skurtveit, Svetlana; Nafstad, Per; Schwarze, Per E.; Skovlund, Eva; Houthuijs, Danny; Aasvang, Gunn Marit                                                                                                                    | [87]  |
| 1997 | Misclassification and selection bias in case-control studies using an automated database                                                                                             | Evans, J. M.; MacDonald, T. M.                                                                                                                                                                                                                                                      | [88]  |
| 2005 | Graphical Rule-based Representation of Signal-transduction Networks                                                                                                                  | Faeder, James R.; Blinov, Michael L.; Hlavacek, William S.                                                                                                                                                                                                                          | [89]  |
| 2002 | Future Directions in Data Mining: Streams, Networks, Self-similarity and Power Laws                                                                                                  | Faloutsos, Christos                                                                                                                                                                                                                                                                 | [90]  |
| 1994 | Beyond Uniformity and Independence: Analysis of R-trees Using the Concept of Fractal Dimension                                                                                       | Faloutsos, Christos; Kamel, Ibrahim                                                                                                                                                                                                                                                 | [91]  |
| 2015 | Hierarchical Graph-Coupled HMMs for Heterogeneous Personalized Health Data                                                                                                           | Fan, Kai; Eisenberg, Marisa; Walsh, Alison; Aiello, Allison; Heller, Katherine                                                                                                                                                                                                      | [92]  |
| 2008 | Ontology-Aware Search on XML-based Electronic Medical Records                                                                                                                        | Farfan, F.; Hristidis, V.; Ranganathan, A.; Burke, R. P.                                                                                                                                                                                                                            | [93]  |
| 2014 | Novel data sources for women's health research: mapping breast screening online information seeking through Google trends                                                            | Fazeli Dehkordy, Soudabeh; Carlos, Ruth C.; Hall, Kelli S.; Dalton, Vanessa K.                                                                                                                                                                                                      | [94]  |
| 2007 | Faster Algorithms for Sorting by Transpositions and Sorting by Block Interchanges                                                                                                    | Feng, Jianxing; Zhu, Daming                                                                                                                                                                                                                                                         | [95]  |
| 2009 | Nursing audit: The impact of nursing annotation in the context of hospital gloss                                                                                                     | Ferreira, Tania S.; Luiz de Souza-Braga, Andre; Soraia Cavalcanti-Valente, Geilsa; Ferreira de Souza, Deise; Moreira Carvalho-Alves, Enilda                                                                                                                                         | [96]  |
| 2014 | Building the graph of medicine from millions of clinical narratives                                                                                                                  | Finlayson, Samuel G.; LePendu, Paea; Shah, Nigam H.                                                                                                                                                                                                                                 | [97]  |
| 2011 | An efficient record linkage scheme using graphical analysis for identifier error detection                                                                                           | Finney, John M.; Walker, A. Sarah; Peto, Tim E. A.; Wyllie, David H.                                                                                                                                                                                                                | [98]  |
| 1995 | Seven years experience with a computerized diabetes clinic database                                                                                                                  | Flack, J. R.                                                                                                                                                                                                                                                                        | [99]  |
| 1995 | Context trees: representing co-operative healthcare activities in IREP                                                                                                               | Florit, A. M.; Mori, A. R.; Simone, M. de; d'Annunzio, V.; Ricci, F. L.; Lalle, C.                                                                                                                                                                                                  | [100] |
| 2018 | Multimedia-enhanced Radiology Reports: Concept, Components, and Challenges                                                                                                           | Folio, Les R.; Machado, Laura B.; Dwyer, Andrew J.                                                                                                                                                                                                                                  | [101] |
| 2007 | Progress report on a post-radial keratotomy patient 20 years after surgery                                                                                                           | Forster, Julie F. Y.; Sun, Amy; Weissman, Barry A.                                                                                                                                                                                                                                  | [102] |
| 2001 | Computer-aided risk management--a software tool for the Hidep model                                                                                                                  | Fors, U. G.; Sandberg, H. C.                                                                                                                                                                                                                                                        | [103] |
| 2018 | Presentation of laboratory test results in patient portals: influence of interface design on risk interpretation and visual search behaviour                                         | Fraccaro, Paolo; Vigo, Markel; Balatsoukas, Panagiotis; van der Veer, Sabine N.; Hassan, Lamiece; Williams, Richard; Wood, Grahame; Sinha, Smeeta; Buchan, Iain; Peek, Niels                                                                                                        | [104] |
| 1993 | An Incremental Algorithm for Building Temporal Quadrees                                                                                                                              | Frazier, George F.                                                                                                                                                                                                                                                                  | [105] |
| 2013 | A mHealth application for chronic wound care: findings of a user trial                                                                                                               | Friesen, Marcia R.; Hamel, Carole; McLeod, Robert D.                                                                                                                                                                                                                                | [106] |
| 2007 | Projecting individualized absolute invasive breast cancer risk in African American women                                                                                             | Gail, Mitchell H.; Costantino, Joseph P.; Pee, David; Bondy, Melissa; Newman, Lisa; Selvan, Mano; Anderson, Garnet L.; Malone, Kathleen E.; Marchbanks, Polly A.; McCaskill-Stevens, Wortia; Norman, Sandra A.; Simon, Michael S.; Spirtas, Robert; Ursin, Giske; Bernstein, Leslie | [107] |
| 2014 | Using an ontological modeling to evaluate the consistency of clinical practice guidelines: application to the comparison of three guidelines on the management of adult hypertension | Galopin, Alexandre; Bouaud, Jacques; Pereira, Suzanne; Seroussi, Brigitte                                                                                                                                                                                                           | [108] |
| 2015 | An Ontology-Based Clinical Decision Support System for the Management of Patients with Multiple Chronic Disorders                                                                    | Galopin, Alexandre; Bouaud, Jacques; Pereira, Suzanne; Seroussi, Brigitte                                                                                                                                                                                                           | [109] |

|      |                                                                                                                                          |                                                                                                               |       |
|------|------------------------------------------------------------------------------------------------------------------------------------------|---------------------------------------------------------------------------------------------------------------|-------|
| 2013 | Semi-supervised clinical text classification with Laplacian SVMs: an application to cancer case management                               | Garla, Vijay; Taylor, Caroline; Brandt, Cynthia                                                               | [110] |
| 1996 | Real-time Incremental Visualization of Dynamic Ultrasound Volumes Using Parallel BSP Trees                                               | Garrett, William F.; Fuchs, Henry; Whitton, Mary C.; State, Andrei                                            | [111] |
| 2014 | Technical report: an ePRO patient reported outcome program for the evaluation of patients with irritable bowel syndrome                  | Gerson, C. D.; Gerson, M-J                                                                                    | [112] |
| 1974 | Interactive Analysis and Display of the Electroencephalogram (EEG) in Real Time                                                          | Gevins, A. S.; Yeager, C. L.; Diamond, S. L.                                                                  | [113] |
| 2016 | A Fast Sketch-based Assembler for Genomes                                                                                                | Ghosh, Priyanka; Kalyanaraman, Ananth                                                                         | [114] |
| 2007 | Emotional and cognitive information processing in web-based medical education                                                            | Giani, U.; Brascio, G.; Bruzzese, D.; Garzillo, C.; Vigilante, S.                                             | [115] |
| 2013 | Evaluating Theoretical Models of Protein Interaction Network Evolution Without Seed Graphs                                               | Gibson, Todd A.; Goldberg, Debra S.                                                                           | [116] |
| 2011 | Web-Based Support for Fracture Healing Evaluation and Monitoring                                                                         | Glinkowski, Wojciech                                                                                          | [117] |
| 2016 | An automated knowledge-based textual summarization system for longitudinal, multivariate clinical data                                   | Goldstein, Ayelet; Shahar, Yuval                                                                              | [118] |
| 2013 | Automatic Generation of a Qualified Medical Knowledge Graph and Its Usage for Retrieving Patient Cohorts from Electronic Medical Records | Goodwin, T.; Harabagiu, S. M.                                                                                 | [119] |
| 2016 | Embedding Open-domain Common-sense Knowledge from Text                                                                                   | Goodwin, Travis; Harabagiu, Sanda                                                                             | [120] |
| 2016 | Medical Question Answering for Clinical Decision Support                                                                                 | Goodwin, Travis R.; Harabagiu, Sanda M.                                                                       | [121] |
| 2018 | Knowledge Representations and Inference Techniques for Medical Question Answering                                                        | Goodwin, Travis R.; Harabagiu, Sanda M.                                                                       | [122] |
| 2015 | Stabilizing high-dimensional prediction models using feature graphs                                                                      | Gopakumar, Shivapratap; Tran, Truyen; Nguyen, Tu Dinh; Phung, Dinh; Venkatesh, Svetha                         | [123] |
| 2008 | Tracing and cataloguing knowledge in an e-health cardiology environment                                                                  | Gortzis, L. G.; Nikiforidis, G.                                                                               | [124] |
| 2013 | Potential value of health information exchange for people with epilepsy: crossover patterns and missing clinical data                    | Grinspan, Zachary M.; Abramson, Erika L.; Banerjee, Samprit; Kern, Lisa M.; Kaushal, Rainu; Shapiro, Jason S. | [125] |
| 2014 | Detecting Roles and Anomalies in Hospital Access Audit Logs                                                                              | Gunter, Carl                                                                                                  | [126] |
| 2012 | Towards the Assessment of Semantic Similarity Analysis of Protein Data: Main Approaches and Issues                                       | Guzzi, Pietro Hiram; Mina, Marco                                                                              | [127] |
| 2004 | Management of pregnancies complicated by anti-c isoimmunization                                                                          | Hackney, David N.; Knudtson, Eric J.; Rossi, Karen Q.; Krugh, Dave; O'Shaughnessy, Richard W.                 | [128] |
| 2005 | Exact Match Search in Sequence Data Using Suffix Trees                                                                                   | Halachev, Mihail; Shiri, Nematollaah; Thamildurai, Anand                                                      | [129] |
| 2004 | Universal electronic health record MUDR                                                                                                  | Hanzlicek, Petr; Spidlen, Josef; Nagy, Miroslav                                                               | [130] |
| 2005 | User interface of MUDR electronic health record                                                                                          | Hanzlicek, Petr; Spidlen, Josef; Heroutova, Helena; Nagy, Miroslav                                            | [131] |
| 2015 | Big mechanisms for processing big data in medical informatics                                                                            | Harabagiu, S.                                                                                                 | [132] |
| 2013 | Next Generation Linkage Management System                                                                                                | Harris, Julie                                                                                                 | [133] |
| 2011 | Low Cost Digital Stethoscope for Heart Sounds                                                                                            | Harsola, A.; Thale, S.; Panse, M. S.                                                                          | [134] |
| 2016 | Design and feasibility of integrating personalized PRO dashboards into prostate cancer care                                              | Hartzler, Andrea L.; Izard, Jason P.; Dalkin, Bruce L.; Mikles, Sean P.; Gore, John L.                        | [135] |
| 1982 | Acquiring otoneurological results by computer. Evaluation after 2 years of experience                                                    | Hausler, R.; Washburn, D.; Rey, P.; Stefanoff, F.                                                             | [136] |
| 2014 | Orion: A system for modeling, transformation and visualization of multidimensional heterogeneous networks                                | Heer, Jeffrey; Perer, Adam                                                                                    | [137] |



|      |                                                                                                                                                       |                                                                                                                                             |       |
|------|-------------------------------------------------------------------------------------------------------------------------------------------------------|---------------------------------------------------------------------------------------------------------------------------------------------|-------|
| 1997 | Nursing classification systems: necessary but not sufficient for representing "what nurses do" for inclusion in computer-based patient record systems | Henry, S. B.; Mead, C. N.                                                                                                                   | [138] |
| 1996 | Constructing a Tree from Homeomorphic Subtrees, with Applications to Computational Evolutionary Biology                                               | Henzinger, Monika Rauch; King, Valerie; Warnow, Tandy                                                                                       | [139] |
| 2009 | Wireless Applications for Hospital Epidemiology                                                                                                       | Herman, Ted; Pemmaraju, Sriram V.; Segre, Alberto M.; Polgreen, Philip M.; Curtis, Donald E.; Fries, Jason; Hlady, Chris; Severson, Monica  | [140] |
| 2012 | Graph-based signal integration for high-throughput phenotyping                                                                                        | Herskovic, Jorge R.; Subramanian, Devika; Cohen, Trevor; Bozzo-Silva, Pamela A.; Bearden, Charles F.; Bernstam, Elmer V.                    | [141] |
| 2012 | Workflow Forever: Semantic Web Semantic Models and Tools for Preserving and Digitally Publishing Computational Experiments                            | Hettne, Kristina; Soiland-Reyes, Stian; Klyne, Graham; Belhajjame, Khalid; Gamble, Matthew; Bechhofer, Sean; Roos, Marco; Corcho, Oscar     | [142] |
| 2008 | The Austrian Stroke-Unit-Registry                                                                                                                     | Hofer, Christine; Kiechl, Stefan; Lang, Wilfried                                                                                            | [143] |
| 2006 | Surgical repair of coarctation of the aorta: up to 40 years of follow-up                                                                              | Hoimyr, Hilde; Christensen, Thomas D.; Emmertsen, Kristian; Johnsen, Soren P.; Riis, Anders; Hansen, Ole Kromann; Hjortdal, Vibeke E.       | [144] |
| 2015 | The Symptoms and Pathogenesis Entity Recognition of TCM Medical Records Based on CRF                                                                  | Honglan, L.; Xiaona, Q.; Bin, F.                                                                                                            | [145] |
| 2009 | Syndromic surveillance using ambulatory electronic health records                                                                                     | Hripcsak, George; Soulakis, Nicholas D.; Li, Li; Morrison, Frances P.; Lai, Albert M.; Friedman, Carol; Calman, Neil S.; Mostashari, Farzad | [146] |
| 2017 | Private and Secured Medical Data Transmission and Analysis for Wireless Sensing Healthcare System                                                     | Huang, H.; Gong, T.; Ye, N.; Wang, R.; Dou, Y.                                                                                              | [147] |
| 2017 | Evaluation of the "Angelina Jolie Effect" on Screening Mammography Utilization in an Academic Center                                                  | Huesch, Marco D.; Schetter, Susann; Segel, Joel; Chetlen, Alison                                                                            | [148] |
| 2001 | Meta-modelling: the appropriate solution for a family of applications                                                                                 | Huet, B.; Artigou, J. Y.; Poirier, J.; Blain, G.                                                                                            | [149] |
| 1982 | An automaton computer program for a microcomputerized real-time (thesaurus based) abstract medical record                                             | Huet, B.; Pourriat, J. L.; Martin, J.; Cupa, M.                                                                                             | [150] |
| 2015 | Security Analysis and Improvement of 'a More Secure Anonymous User Authentication Scheme for the Integrated EPR Information System'                   | Islam, S. K. Hafizul; Khan, Muhammad Khurram; Li, Xiong                                                                                     | [151] |
| 2013 | Italian cancer figures, report 2012: Cancer in children and adolescents                                                                               |                                                                                                                                             | [152] |
| 1987 | An Object-oriented Programming Discipline for Standard Pascal                                                                                         | Jacky, Jonathan P.; Kalet, Ira J.                                                                                                           | [153] |
| 2013 | Significance of copper level in serum and routine laboratory parameters in estimation of outspreading of Hodgkin's lymphoma                           | Jamakovic, Mesud; Baljic, Rusmir                                                                                                            | [154] |
| 2001 | Towards a Visual Query Interface for Phylogenetic Databases                                                                                           | Jamil, Hasan M.; Modica, Giovanni A.; Teran, Maria A.                                                                                       | [155] |
| 2017 | A Pilot Comparison of a Smartphone App With or Without 2-Way Messaging Among Chronic Pain Patients: Who Benefits From a Pain App?                     | Jamison, Robert N.; Jurcik, Dylan C.; Edwards, Robert R.; Huang, Chuan-Chin; Ross, Edgar L.                                                 | [156] |
| 1986 | Testing an expert system for hypertension                                                                                                             | Jeunemaitre, X.; Degoulet, P.; Morice, V.; Chatellier, G.; Devries, C.; Plouin, P. F.; Boisivieux, J. F.; Menard, J.                        | [157] |
| 2016 | Predicting Comorbid Conditions and Trajectories using Social Health Records                                                                           | Ji, Xiang; Ae Chun, Soon; Geller, James                                                                                                     | [158] |
| 2017 | Learning and inference in knowledge-based probabilistic model for medical diagnosis                                                                   | Jiang, Jingchi; Li, Xueli; Zhao, Chao; Guan, Yi; Yu, Qiubin                                                                                 | [159] |
| 2014 | A complementary graphical method for reducing and analyzing large data sets. Case studies demonstrating thresholds setting and selection              | Jing, X.; Cimino, J. J.                                                                                                                     | [160] |

|      |                                                                                                                                                                                                                         |                                                                                                                                                 |       |
|------|-------------------------------------------------------------------------------------------------------------------------------------------------------------------------------------------------------------------------|-------------------------------------------------------------------------------------------------------------------------------------------------|-------|
| 2014 | Identity Tracking in Big Data: Preliminary Research Using In-Memory Data Graph Models for Record Linkage and Probabilistic Signature Hashing for Approximate String Matching in Big Health and Human Services Databases | Jupin, Joseph; Shi, Justin Y.                                                                                                                   | [161] |
| 2016 | Stable clinical prediction using graph support vector machines                                                                                                                                                          | Kamkar, I.; Gupta, S.; Li, Cheng; Phung, D.; Venkatesh, S.                                                                                      | [162] |
| 2015 | Managing Data in Healthcare Information Systems: Many Models, One Solution                                                                                                                                              | Kaur, K.; Rani, R.                                                                                                                              | [163] |
| 2013 | Unsupervised Extraction of Diagnosis Codes from EMRs Using Knowledge-Based and Extractive Text Summarization Techniques                                                                                                 | Kavuluru, Ramakanth; Han, Sifei; Harris, Daniel                                                                                                 | [164] |
| 1992 | Management of personal health examination data for a population by use of a portable computer                                                                                                                           | Kawada, T.; Aoki, S.; Suzuki, S.                                                                                                                | [165] |
| 2012 | Lullaby: A Capture & Access System for Understanding the Sleep Environment                                                                                                                                              | Kay, Matthew; Choe, Eun Kyoung; Shepherd, Jesse; Greenstein, Benjamin; Watson, Nathaniel; Consolvo, Sunny; Kientz, Julie A.                     | [166] |
| 2007 | Reduction of multi-dimensional laboratory data to a two-dimensional plot: a novel technique for the identification of laboratory error                                                                                  | Kazmierczak, Steven C.; Leen, Todd K.; Erdogmus, Deniz; Carreira-Perpinan, Miguel A.                                                            | [167] |
| 2017 | Toward Meaningful Care Plan Clinical Decision Support: Feasibility and Effects of a Simulated Pilot Study                                                                                                               | Keenan, Gail M.; Lopez, Karen Dunn; Yao, Yingwei; Sousa, Vanessa E. C.; Stifter, Janet; Febretti, Alessandro; Johnson, Andrew; Wilkie, Diana J. | [168] |
| 1984 | Antenatal records: do they help us? A new record for watching fetal growth                                                                                                                                              | Kennedy, I.; Ritter, H.                                                                                                                         | [169] |
| 1979 | A novel antenatal record to help midwives                                                                                                                                                                               | Kennedy, I.; Stephens, B.                                                                                                                       | [170] |
| 2012 | The effect of complete integration of HIV and TB services on time to initiation of antiretroviral therapy: a before-after study                                                                                         | Kerschberger, Bernhard; Hilderbrand, Katherine; Boule, Andrew M.; Coetzee, David; Goemaere, Eric; Azevedo, Virginia de; van Cutsem, Gilles      | [171] |
| 2013 | Personalized Electronic Health Record System for Monitoring Patients with Chronic Disease                                                                                                                               | Khan, I. A.                                                                                                                                     | [172] |
| 2017 | Summarizing Static and Dynamic Big Graphs                                                                                                                                                                               | Khan, Arijit; Bhowmick, Sourav S.; Bonchi, Francesco                                                                                            | [173] |
| 2014 | Systems for Big-graphs                                                                                                                                                                                                  | Khan, Arijit; Elnikety, Sameh                                                                                                                   | [174] |
| 2013 | Health care transformation through collaboration on open-source informatics projects: integrating a medical applications platform, research data repository, and patient summarization                                  | Klann, Jeffrey G.; McCoy, Allison B.; Wright, Adam; Wattanasin, Nich; Sittig, Dean F.; Murphy, Shawn N.                                         | [175] |
| 2014 | Decision support from local data: creating adaptive order menus from past clinician behavior                                                                                                                            | Klann, Jeffrey G.; Szolovits, Peter; Downs, Stephen M.; Schadow, Gunther                                                                        | [176] |
| 2013 | Monitoring of dairy cow claw health status in 15 herds using the computerised documentation program Claw Manager and digital parameters                                                                                 | Kofler, J.; Pesenhofer, R.; Landl, G.; Sommerfeld-Stur, I.; Peham, C.                                                                           | [177] |
| 2014 | Semantic Search As Inference: Applications in Health Informatics                                                                                                                                                        | Koopman, Bevan                                                                                                                                  | [178] |
| 2012 | Graph-based Concept Weighting for Medical Information Retrieval                                                                                                                                                         | Koopman, Bevan; Zuccon, Guido; Bruza, Peter; Sitbon, Laurianne; Lawley, Michael                                                                 | [179] |
| 2011 | Retrospective monitoring in the management of persistent asthma                                                                                                                                                         | Kourtis, Georgios; Caiaffa, Maria-Filomena; Forte, Cesarea; Scarlato, Marisa I.; Macchia, Luigi                                                 | [180] |
| 2016 | Using Arden Syntax for the Generation of Intelligent Intensive Care Discharge Letters                                                                                                                                   | Kraus, Stefan; Castellanos, Ixchel; Albermann, Matthias; Schuettler, Christina; Prokosch, Hans-Ulrich; Staudigel, Martin; Toddenroth, Dennis    | [181] |
| 2008 | Combining Two Forms of Simulation to Predict the Potential Impact of Interface Design on Technology-induced Error in Healthcare                                                                                         | Kushniruk, Andre; Borycki, Elizabeth; Anderson, James G.; Anderson, Marilyn M.                                                                  | [182] |
| 2014 | Lifelog agent for human activity pattern analysis on health avatar platform                                                                                                                                             | Kwon, Yongjin; Kang, Kyuchang; Bae, Changseok; Chung, Hee-Joon; Kim, Ju Han                                                                     | [183] |
| 2014 | Merging Partially Labelled Trees: Hardness and a Declarative Programming Solution                                                                                                                                       | Labarre, Anthony; Verwer, Sicco                                                                                                                 | [184] |
| 2001 | 101 Optimal PDB Structure Alignments: A Branch-and-cut Algorithm for the Maximum Contact Map Overlap Problem                                                                                                            | Lancia, Giuseppe; Carr, Robert; Walenz, Brian; Istrail, Sorin                                                                                   | [185] |



|      |                                                                                                                                                                 |                                                                                                                                                                                        |       |
|------|-----------------------------------------------------------------------------------------------------------------------------------------------------------------|----------------------------------------------------------------------------------------------------------------------------------------------------------------------------------------|-------|
| 2015 | Provider-Driven Development of a Measurement Feedback System to Enhance Measurement-Based Care in VA Mental Health                                              | Landes, Sara J.; Carlson, Eve B.; Ruzek, Josef I.; Wang, Dan; Hugo, Emily; DeGaetano, Noah; Chambers, Justin G.; Lindley, Steven E.                                                    | [186] |
| 2015 | Learning Curve Analysis and Surgical Outcomes of Single-port Laparoscopic Myomectomy                                                                            | Lee, Hee Jun; Kim, Ju Yeong; Kim, Seul Ki; Lee, Jung Ryeol; Suh, Chang Suk; Kim, Seok Hyun                                                                                             | [187] |
| 2008 | Incidence of thyroid cancer in residents surrounding the Three Mile Island nuclear facility                                                                     | Levin, Roger J.                                                                                                                                                                        | [188] |
| 2012 | Associating clinical archetypes through UMLS Metathesaurus term clusters                                                                                        | Lezcano, Leonardo; Sanchez-Alonso, Salvador; Sicilia, Miguel-Angel                                                                                                                     | [189] |
| 2017 | Development of a web-based epidemiological surveillance system with health system response for improving maternal and newborn health: Field-testing in Thailand | Liabsuetrakul, Tippawan; Prappre, Tagoon; Pairoit, Pakamas; Oumudee, Nurlisa; Islam, Monir                                                                                             | [190] |
| 2011 | Visual Exploration Across Biomedical Databases                                                                                                                  | Lieberman, Michael D.; Taheri, Sima; Guo, whatever; Mirrashed, Fatemeh; Yahav, Inbal; Aris, Aleks; Shneiderman, Ben                                                                    | [191] |
| 2017 | Usability of data integration and visualization software for multidisciplinary pediatric intensive care: a human factors approach to assessing technology       | Lin, Ying Ling; Guerguerian, Anne-Marie; Tomasi, Jessica; Laussen, Peter; Trbovich, Patricia                                                                                           | [192] |
| 2014 | Mockup design of personal health diary app for patients with chronic kidney disease                                                                             | Lin, Hsiu-Wen; Wang, Yu-Jen; Jing, Ling-Fang; Chang, Polun                                                                                                                             | [193] |
| 2015 | A genetic algorithm enabled ensemble for unsupervised medical term extraction from clinical letters                                                             | Liu, Wei; Chung, Bo Chuen; Wang, Rui; Ng, Jonathon; Morlet, Nigel                                                                                                                      | [194] |
| 2013 | Mining Biomedical Ontologies and Data Using RDF Hypergraphs                                                                                                     | Liu, H.; Dou, D.; Jin, R.; Lependu, P.; Shah, N.                                                                                                                                       | [195] |
| 2011 | Protein Subcellular Localization Prediction with Associative Classification and Multi-class SVM                                                                 | Liu, Yifeng; Guo, Zhaochen; Ke, Xiaodi; Zaiane, Osmar R.                                                                                                                               | [196] |
| 2015 | Temporal Phenotyping from Longitudinal Electronic Health Records: A Graph Based Framework                                                                       | Liu, Chuanren; Wang, Fei; Hu, Jianying; Xiong, Hui                                                                                                                                     | [197] |
| 2000 | Integration of computer-assembled digital images and text data as evidence for the oncological record                                                           | Liu, J. M.; Wu, H. W.; Chen, W. S.; Lin, W. C.; Chao, Y.; Lui, W. Y.; Whang-Peng, J.                                                                                                   | [198] |
| 2016 | TimeSpan: Using Visualization to Explore Temporal Multi-dimensional Data of Stroke Patients                                                                     | Loorak, Mona Hosseinkhani; Perin, Charles; Kamal, Noreen; Hill, Michael; Carpendale, Sheelagh                                                                                          | [199] |
| 2016 | Nurses' Numeracy and Graphical Literacy: Informing Studies of Clinical Decision Support Interfaces                                                              | Lopez, Karen Dunn; Wilkie, Diana J.; Yao, Yingwei; Sousa, Vanessa; Febretti, Alessandro; Stifter, Janet; Johnson, Andrew; Keenan, Gail M.                                              | [200] |
| 2001 | Paragraph-oriented structure for narratives in medical documentation                                                                                            | Lovis, C.; Baud, R. H.; Revillard, C.; Pult, L.; Borst, F.; Geissbuhler, A.                                                                                                            | [201] |
| 2015 | Subgraph augmented non-negative tensor factorization (SANTF) for modeling clinical narrative text                                                               | Luo, Yuan; Xin, Yu; Hochberg, Ephraim; Joshi, Rohit; Uzuner, Ozlem; Szolovits, Peter                                                                                                   | [202] |
| 2016 | Deconstructing the smoking-preeclampsia paradox through a counterfactual framework                                                                              | Luque-Fernandez, Miguel Angel; Zoega, Helga; Valdimarsdottir, Unnur; Williams, Michelle A.                                                                                             | [203] |
| 2009 | Classification of Patient Case Discussions Through Analysis of Vocalisation Graphs                                                                              | Luz, Saturnino; Kane, Bridget                                                                                                                                                          | [204] |
| 2016 | A representational analysis of a temporal indeterminacy display in clinical events                                                                              | Madkour, M.; Song, Hsing-yi; Du Jingcheng; Tao, C.                                                                                                                                     | [205] |
| 2014 | Formal representation of service interactions for SaaS based applications                                                                                       | Mandal, A. K.; Sarkar, A.                                                                                                                                                              | [206] |
| 2010 | Defining quality-measurable medical alerts from incomplete data through fuzzy linguistic variables and modifiers                                                | Manzi de Arantes, Wilmondes Jr; Verdier, Christine                                                                                                                                     | [207] |
| 2017 | Intelligent MONitoring System for antiviral pharmacotherapy in patients with chronic hepatitis C (SiMON-VC)                                                     | Margusino-Framinan, Luis; Cid-Silva, Purificacion; Mena-de-Cea, Alvaro; Sanclaudio-Luhia, Ana Isabel; Castro-Castro, Jose Antonio; Vazquez-Gonzalez, Guillermo; Martin-Herranz, Isabel | [208] |
| 2016 | A Knowledge Map for Hospital Performance Concept: Extraction and Analysis: A Narrative Review Article                                                           | Markazi-Moghaddam, Nader; Arab, Mohammad; Ravaghi, Hamid; Rashidian, Arash; Khatibi, Toktam; Zargar Balaye Jame, Sanaz                                                                 | [209] |

|      |                                                                                                                                                                              |                                                                                                                              |       |
|------|------------------------------------------------------------------------------------------------------------------------------------------------------------------------------|------------------------------------------------------------------------------------------------------------------------------|-------|
| 2002 | Relative bias in diet history measurements: a quality control technique for dietary intervention trials                                                                      | Martin, Gina S.; Tapsell, Linda C.; Batterham, Marijka J.; Russell, Kenneth G.                                               | [210] |
| 2014 | Improving search over Electronic Health Records using UMLS-based query expansion through random walks                                                                        | Martinez, David; Otegi, Arantxa; Soroa, Aitor; Agirre, Eneko                                                                 | [211] |
| 2017 | Validating EHR clinical models using ontology patterns                                                                                                                       | Martinez-Costa, Catalina; Schulz, Stefan                                                                                     | [212] |
| 2015 | Heterogeneous Compression of Large Collections of Evolutionary Trees                                                                                                         | Matthews, Suzanne J.                                                                                                         | [213] |
| 2013 | The Child Therapy Tracking System (CTTS): A model for an expressive therapy electronic health record (EHR)                                                                   | Mattson, Donald C.; Yang, Jing                                                                                               | [214] |
| 2009 | Extracting Temporal Rules from Medical Data                                                                                                                                  | Meamarzadeh, H.; Khayyambashi, M. R.; Saraee, M. H.                                                                          | [215] |
| 1997 | PRIME-GC. A medical information retrieval prototype on the Web                                                                                                               | Mechkour, M.; Mulhem, P.; Fourel, F.; Berrut, E. F. C.                                                                       | [216] |
| 2002 | Analyzing the Semantics of Patient Data to Rank Records of Literature Retrieval                                                                                              | Mendonça, Eneida A.; Johnson, Stephen B.; Seol, Yoon-Ho; Cimino, James J.                                                    | [217] |
| 2012 | Common data model for natural language processing based on two existing standard information models: CDA+GrAF                                                                | Meystre, Stephane M.; Lee, Sanghoon; Jung, Chai Young; Chevrier, Raphael D.                                                  | [218] |
| 2016 | High-performance Data Structures for De Novo Assembly of Genomes: Cache Oblivious Generic Programming                                                                        | Milicchio, Franco; Tradigo, Giuseppe; Veltri, Pierangelo; Prosperi, Mattia                                                   | [219] |
| 2002 | Scientific evaluation and quality assurance in refractive surgical interventions. Evaluation of the Datagraph med computer program                                           | Mirshahi, A.; Kohnen, T.                                                                                                     | [220] |
| 2012 | Cerebrovascular disease in 48 countries: secular trends in mortality 1950-2005                                                                                               | Mirzaei, Masoud; Truswell, A. Stewart; Arnett, Kathryn; Page, Andrew; Taylor, Richard; Leeder, Stephen R.                    | [221] |
| 2016 | Mobile-assisted remote healthcare delivery                                                                                                                                   | Mondal, S.; Mukherjee, N.                                                                                                    | [222] |
| 2010 | Discovering client and intervention patterns in home visiting data                                                                                                           | Monsen, Karen A.; Banerjee, Arindam; Das, Puja                                                                               | [223] |
| 2005 | A rapid self-administered food frequency questionnaire for the evaluation of dietary protein intake                                                                          | Morin, Patricia; Herrmann, Francois; Ammann, Patrick; Uebelhart, Brigitte; Rizzoli, Rene                                     | [224] |
| 2014 | The new culture of dematerialized health                                                                                                                                     | Moruzzi, Mauro                                                                                                               | [225] |
| 2009 | Shrinkage Effect in Ancestral Maximum Likelihood                                                                                                                             | Mossel, Elchanan; Roch, Sebastien; Steel, Mike                                                                               | [226] |
| 2011 | A Scalable Multi-scale Framework for Parallel Simulation and Visualization of Microbial Evolution                                                                            | Mozhayskiy, Vadim; Miller, Bob; Ma, Kwan-Liu; Tagkopoulos, Ilias                                                             | [227] |
| 1997 | The CliniCon framework for context representation in electronic patient records                                                                                              | Muller, R.                                                                                                                   | [228] |
| 1997 | The CliniCon framework for context representation in electronic patient records                                                                                              | Muller, R.                                                                                                                   | [229] |
| 1997 | THEMPO: a knowledge-based system for therapy planning in pediatric oncology                                                                                                  | Muller, R.; Serogl, M.; Nauwerth, U.; Schoppe, D.; Pommerening, K.; Dittrich, H. M.                                          | [230] |
| 1996 | A graph-grammar approach to represent causal, temporal and other contexts in an oncological patient record                                                                   | Muller, R.; Thews, O.; Rohrbach, C.; Serogl, M.; Pommerening, K.                                                             | [231] |
| 2005 | Electronic growth charts: watching our patients grow                                                                                                                         | Murphy, Cynthia A.; Carstens, Kimberly; Villamayor, Precy                                                                    | [232] |
| 2014 | Assessment of paediatric inpatient care during a multifaceted quality improvement intervention in Kenyan district hospitals--use of prospectively collected case record data | Mwaniki, Paul; Ayieko, Philip; Todd, Jim; English, Mike                                                                      | [233] |
| 2012 | Early vaccinations are not risk factors for celiac disease                                                                                                                   | Myleus, Anna; Stenlund, Hans; Hernell, Olle; Gothefors, Leif; Hammarstrom, Marie-Louise; Persson, Lars-Ake; Ivarsson, Anneli | [234] |
| 2012 | Computing Gene Functional Similarity Using Combined Graphs                                                                                                                   | Nagar, Anurag; Al-Mubaid, Hisham; Bettayeb, Said                                                                             | [235] |
| 1998 | Clinical efficiency tools improve stroke management in a rural southern health system                                                                                        | Newell, S. D. [JR]; Englert, J.; Box-Taylor, A.; Davis, K. M.; Koch, K. E.                                                   | [236] |

|      |                                                                                                                                                                         |                                                                                                                                                                                                     |       |
|------|-------------------------------------------------------------------------------------------------------------------------------------------------------------------------|-----------------------------------------------------------------------------------------------------------------------------------------------------------------------------------------------------|-------|
| 2014 | PARAMO: a PARAllel predictive MOdeling platform for healthcare analytic research using electronic health records                                                        | Ng, Kenney; Ghoting, Amol; Steinhubl, Steven R.; Stewart, Walter F.; Malin, Bradley; Sun, Jimeng                                                                                                    | [237] |
| 2017 | Automated Medical Diagnosis by Ranking Clusters Across the Symptom-Disease Network                                                                                      | Ni, J.; Fei, H.; Fan, W.; Zhang, X.                                                                                                                                                                 | [238] |
| 2010 | A Fielded Wiki for Personality Genetics                                                                                                                                 | Nielsen, Finn \AArup                                                                                                                                                                                | [239] |
| 2013 | Towards generating a patient's timeline: extracting temporal relationships from clinical notes                                                                          | Nikfarjam, Azadeh; Emadzadeh, Ehsan; Gonzalez, Graciela                                                                                                                                             | [240] |
| 2008 | Temporal Pattern Discovery for Trends and Transient Effects: Its Application to Patient Records                                                                         | Norén, G. Niklas; Bate, Andrew; Hopstadius, Johan; Star, Kristina; Edwards, I. Ralph                                                                                                                | [241] |
| 2010 | Temporal pattern discovery in longitudinal electronic patient records                                                                                                   | Noren, G. Niklas; Hopstadius, Johan; Bate, Andrew; Star, Kristina; Edwards, I. Ralph                                                                                                                | [242] |
| 2015 | Simultaneous Modeling of Multiple Diseases for Mortality Prediction in Acute Hospital Care                                                                              | Nori, Nozomi; Kashima, Hisashi; Yamashita, Kazuto; Ikai, Hiroshi; Imanaka, Yuichi                                                                                                                   | [243] |
| 1988 | Cancer registration using case history database in hospital information system                                                                                          | Nose, Y.; Akazawa, K.; Watanabe, Y.; Yokota, M.; Okamura, S.; Maehara, Y.; Sugimachi, K.                                                                                                            | [244] |
| 1998 | Development and evaluation of regional health database systems                                                                                                          | Ogushi, Y.; Haruki, Y.; Okada, Y.; Takahashi, M.; Shimizu, M.; Izumi, Y.; Watabe, T.; Kobayashi, S.; Okuyama, J.; Kurita, Y.                                                                        | [245] |
| 2012 | A hypothesis-generating support system using medical records for clinical knowledge acquisition                                                                         | Okamoto, K.; Tanaka, H.; Takemura, T.; Kume, N.; Kuroda, T.; Yoshihara, H.                                                                                                                          | [246] |
| 2011 | Managing Security and Privacy in Ubiquitous eHealth Information Interchange                                                                                             | Oladimeji, Ebenezer A.; Chung, Lawrence; Jung, Hyo Taeg; Kim, Jaehyouon                                                                                                                             | [247] |
| 1995 | Read Codes Version 3: a user led terminology                                                                                                                            | O'Neil, M.; Payne, C.; Read, J.                                                                                                                                                                     | [248] |
| 2016 | Generation of Sentence Template Graph from SOAP Format Medical Documents                                                                                                | Onimura, N.; Yamashita, T.; Nakayama, N.; Soejima, H.; Hirokawa, S.                                                                                                                                 | [249] |
| 2012 | Using a time-geographical diary method in order to facilitate reflections on changes in patterns of daily occupations                                                   | Orban, Kristina; Edberg, Anna-Karin; Erlandsson, Lena-Karin                                                                                                                                         | [250] |
| 2014 | Effective methods of organizing complex information in advanced cancer patients                                                                                         | Oshiro, Tatsuo; Oshiro, Hisako; Tanimizu, Masahito                                                                                                                                                  | [251] |
| 2015 | The Impact of Comorbid Depression on Educational Inequality in Survival after Acute Coronary Syndrome in a Cohort of 83 062 Patients and a Matched Reference Population | Osler, Merete; Prescott, Eva; Wium-Andersen, Ida Kim; Ibfelt, Else Helene; Jorgensen, Martin Balslev; Andersen, Per Kragh; Jorgensen, Terese Sara Hoj; Wium-Andersen, Marie Kim; Martensson, Solvej | [252] |
| 2016 | Electronic health records: Improvement to healthcare decision-making                                                                                                    | Osop, H.; Sahama, T.                                                                                                                                                                                | [253] |
| 2008 | International variation in the incidence of oral and pharyngeal cancer                                                                                                  | O'Sullivan, E. M.                                                                                                                                                                                   | [254] |
| 2013 | Mediation and graph data models for medical data integration                                                                                                            | Pabón, M. C.; Montoya, G. A.; Millán, M.                                                                                                                                                            | [255] |
| 2010 | Fifty years of cancer incidence: CI5 I-IX                                                                                                                               | Parkin, D. Max; Ferlay, Jacques; Curado, Maria-Paula; Bray, Freddie; Edwards, Brenda; Shin, Hai-Rim; Forman, David                                                                                  | [256] |
| 2013 | Mining drug-drug interaction patterns from linked data: A case study for Warfarin, Clopidogrel, and Simvastatin                                                         | Pathak, J.; Kiefer, R. C.; Chute, C. G.                                                                                                                                                             | [257] |
| 2016 | Digital signal preservation approaches of archived biomedical paper records #x2014; A review                                                                            | Patil, R.; Karandikar, R. G.                                                                                                                                                                        | [258] |
| 2006 | Fall-related injuries among agricultural household members: Regional Rural Injury Study II (RRIS-II)                                                                    | Paulson, Erin H.; Gerberich, Susan Goodwin; Alexander, Bruce H.; Ryan, Andrew; Renier, Colleen M.; Zhang, Xueying; French, L. Ronald; Masten, Ann S.; Carlson, Kathleen Ferguson                    | [259] |
| 2012 | Development of clinical pharmacy productivity metrics                                                                                                                   | Pawloski, Pamala; Cusick, Dona; Amborn, Lori                                                                                                                                                        | [260] |
| 1999 | Graphing clinical events in the VA Computerized Patient Record System                                                                                                   | Payne, T. H.; Andrews, R. D.; Breeling, J.; Ben Davoren, J.; Smith, R. M.; Volpp, B.                                                                                                                | [261] |
| 2017 | Social Network Analytics, Data Science Ethics & Privacy-preserving Analytics                                                                                            | Pedreschi, Dino                                                                                                                                                                                     | [262] |

|      |                                                                                                                                                                   |                                                                                                                                                                                        |       |
|------|-------------------------------------------------------------------------------------------------------------------------------------------------------------------|----------------------------------------------------------------------------------------------------------------------------------------------------------------------------------------|-------|
| 1992 | Physicians take to the field                                                                                                                                      | Penfield, W.                                                                                                                                                                           | [263] |
| 2011 | Actual state and perspectives of e-health in Austria and international--an overview                                                                               | Pfeiffer, Karl P.                                                                                                                                                                      | [264] |
| 2015 | Utilizing the Wikidata System to Improve the Quality of Medical Content in Wikipedia in Diverse Languages: A Pilot Study                                          | Pfundner, Alexander; Schnoeberg, Tobias; Horn, John; Boyce, Richard D.; Samwald, Matthias                                                                                              | [265] |
| 1995 | Free text analysis                                                                                                                                                | Pietrzyk, P. M.                                                                                                                                                                        | [266] |
| 1999 | MRI evaluation of post-operative seromas in extremity soft tissue sarcomas                                                                                        | Poon-Chue, A.; Menendez, L.; Gerstner, M. M.; Colletti, P.; Terk, M.                                                                                                                   | [267] |
| 2014 | 'Real-life' information on pulmonary arterial hypertension: the iPHnet Project                                                                                    | Poscia, Roberto; Ghio, Stefano; D'Alto, Michele; Vitulo, Patrizio; Mule, Massimiliano; Albera, Carlo; Parisi, Francesco; Badagliacca, Roberto; Fedele, Francesco; Vizza, Carmine Dario | [268] |
| 1982 | Case summaries in real-time. Accomplishments with a microcomputer                                                                                                 | Pourriat, J. L.; Huet, B.; Gabry, A. L.; Rolland, C.; Cupa, M.                                                                                                                         | [269] |
| 2015 | Epidemiological Survey of Sinonasal Malignancy in North-East Iran                                                                                                 | Poursadegh, Mehdi; Poursadegh, Farid; Esmaeili, Majid; Bakhshae, Mehdi                                                                                                                 | [270] |
| 1997 | Summarizing clinical psychiatric data                                                                                                                             | Powsner, S. M.; Tufte, E. R.                                                                                                                                                           | [271] |
| 2012 | Designing observation charts to optimize the detection of patient deterioration: reliance on the subjective preferences of healthcare professionals is not enough | Preece, Megan H. W.; Hill, Andrew; Horswill, Mark S.; Karamatic, Rozemary; Watson, Marcus O.                                                                                           | [272] |
| 2010 | A snapshot of rehabilitation referrals in rural New South Wales                                                                                                   | Pryor, Julie                                                                                                                                                                           | [273] |
| 2008 | Integrated multimedia electronic patient record and graph-based image information for cerebral tumors                                                             | Puentes, John; Batrancourt, Benedicte; Atif, Jamal; Angelini, Elsa; Lecornu, Laurent; Zemirline, Abdelhamid; Bloch, Isabelle; Coatrieux, Gouenou; Roux, Christian                      | [274] |
| 2013 | Big data framework for national E-governance plan                                                                                                                 | Rajagopalan, M. R.; Vellaipandiyar, S.                                                                                                                                                 | [275] |
| 1999 | Acute sensorineural hearing loss at the Otorhinolaryngology Department of the General Hospital in Subotica 1991-1996                                              | Rakic, N.                                                                                                                                                                              | [276] |
| 1992 | AXAUDIT - ANESTHETIC AUDIT SYSTEM                                                                                                                                 | RAMAYYA, G. P.                                                                                                                                                                         | [277] |
| 1995 | Current trends with natural language processing                                                                                                                   | Rassinoux, A. M.; Michel, P. A.; Wagner, J.; Baud, R.                                                                                                                                  | [278] |
| 1979 | A cancer registry for the community radiation center                                                                                                              | Rathe, J. C.; Elliott, P. F.                                                                                                                                                           | [279] |
| 1994 | From multimodality digital imaging to multimedia patient record                                                                                                   | Ratib, O.                                                                                                                                                                              | [280] |
| 2009 | Bayesian Network Classifier for Medical Data Analysis                                                                                                             | Reiz, Beata; Csato, Lehel                                                                                                                                                              | [281] |
| 2014 | Risk factors for hospitalization after dog bite injury: a case-cohort study of emergency department visits                                                        | Rhea, Sarah; Weber, David J.; Poole, Charles; Cairns, Charles                                                                                                                          | [282] |
| 2016 | Interoperability of Relationship- and Role-Based Access Control                                                                                                   | Rizvi, Syed Zain R.; Fong, Philip W.L.                                                                                                                                                 | [283] |
| 2015 | Relationship-Based Access Control for an Open-Source Medical Records System                                                                                       | Rizvi, Syed Zain R.; Fong, Philip W.L.; Crampton, Jason; Sellwood, James                                                                                                               | [284] |
| 2011 | Graph Comparison by Log-Odds Score Matrices with Application to Protein Topology Analysis                                                                         | Rocha, J.                                                                                                                                                                              | [285] |
| 1977 | The use of automated ambulatory medical records                                                                                                                   | Rodnick, J. E.                                                                                                                                                                         | [286] |
| 1993 | Developing a standard data structure for medical language--the SNOMED proposal                                                                                    | Rothwell, D. J.; Cote, R. A.; Cordeau, J. P.; Boisvert, M. A.                                                                                                                          | [287] |
| 2017 | Learning a Health Knowledge Graph from Electronic Medical Records                                                                                                 | Rotmensch, Maya; Halpern, Yoni; Tlilat, Abdulhakim; Horng, Steven; Sontag, David                                                                                                       | [288] |
| 2016 | The Association of Graph Literacy With Use of and Skills Using an Online Personal Health Record in Outpatient Veterans                                            | Ruiz, Jorge G.; Andrade, Allen D.; Hogue, Christie; Karanam, Chandana; Akkineni, Sisir; Cevallos, David; Anam, Ramanakumar; Sharit, Joseph                                             | [289] |
| 2014 | TongueDx: A Tongue Diagnosis for Health Care on Smartphones                                                                                                       | Ryu, Ini; Siio, Itiro                                                                                                                                                                  | [290] |
| 2017 | Symptoms investigation by means of formal concept analysis for enhancing medical diagnoses                                                                        | Săcărea, C.; Șotropa, D.; Troancă, D.                                                                                                                                                  | [291] |
| 2008 | An information system for injuries from external causes (SILEX): a successful project in El Salvador                                                              | Salinas, Oscar; Cosio, Gerardo de; Clavel-Arcas, Carme; Montoya, Jeannette; Serpas, Mario; Moran de Garcia, Silvia; Concha-Eastman, Alberto                                            | [292] |

|      |                                                                                                                                                                                                   |                                                                                                                                                                                                                                                                             |       |
|------|---------------------------------------------------------------------------------------------------------------------------------------------------------------------------------------------------|-----------------------------------------------------------------------------------------------------------------------------------------------------------------------------------------------------------------------------------------------------------------------------|-------|
| 2010 | Understanding quality in data from hospital diagnosis and procedures: A statistical characterization                                                                                              | Sato, D.; Freitas, A.                                                                                                                                                                                                                                                       | [293] |
| 2005 | Medical record linkage in health information systems by approximate string matching and clustering                                                                                                | Sauleau, Erik A.; Paumier, Jean-Philippe; Buemi, Antoine                                                                                                                                                                                                                    | [294] |
| 2011 | Integration of remote blood glucose meter upload technology into a clinical pharmacist medication therapy management service                                                                      | Schenk, Robert J. [JR]; Schenk, Jenna                                                                                                                                                                                                                                       | [295] |
| 2013 | Identifying cases of congestive heart failure from administrative data: a validation study using primary care patient records                                                                     | Schultz, S. E.; Rothwell, D. M.; Chen, Z.; Tu, K.                                                                                                                                                                                                                           | [296] |
| 2013 | Identifying cases of congestive heart failure from administrative data: a validation study using primary care patient records                                                                     | Schultz, S. E.; Rothwell, D. M.; Chen, Z.; Tu, K.                                                                                                                                                                                                                           | [297] |
| 2008 | Design, feasibility, and acceptability of an intervention using personal digital assistant-based self-monitoring in managing type 2 diabetes                                                      | Sevick, Mary Ann; Zickmund, Susan; Korytkowski, Mary; Piraino, Beth; Sereika, Susan; Mihalko, Shannon; Snetselaar, Linda; Stumbo, Phyllis; Hausmann, Leslie; Ren, Dianxu; Marsh, Rita; Sakraida, Teresa; Gibson, Jolynn; Safaien, Mehry; Starrett, Terry J.; Burke, Lora E. | [298] |
| 2015 | Predicting Health Outcomes from High-Dimensional Longitudinal Health Histories Using Relational Random Forests                                                                                    | Shahn, Zach; Ryan, Patrick; Madigan, David                                                                                                                                                                                                                                  | [299] |
| 2014 | The Roles of Health Literacy, Numeracy, and Graph Literacy on the Usability of the VA's Personal Health Record by Veterans                                                                        | Sharit, Joseph; Lisigurski, Miriam; Andrade, Allen D.; Karanam, Chandana; Nazi, Kim M.; Lewis, James R.; Ruiz, Jorge G.                                                                                                                                                     | [300] |
| 2009 | Algebraic Visual Analysis: The Catalano Phone Call Data Set Case Study                                                                                                                            | Shaverdian, Anna A.; Zhou, Hao; Michailidis, George; Jagadish, H. V.                                                                                                                                                                                                        | [301] |
| 2014 | Validity of establishing pediatric reference intervals based on hospital patient data: a comparison of the modified Hoffmann approach to CALIPER reference intervals obtained in healthy children | Shaw, Julie L. V.; Cohen, Ashley; Konforte, Danijela; Binesh-Marvasti, Tina; Colantonio, David A.; Adeli, Khosrow                                                                                                                                                           | [302] |
| 2011 | Timelining: visualizing experience                                                                                                                                                                | Sheridan, Joanna; Chamberlain, Kerry; Dupuis, Ann                                                                                                                                                                                                                           | [303] |
| 2010 | Geometric Suffix Tree: Indexing Protein 3-D Structures                                                                                                                                            | Shibuya, Tetsuo                                                                                                                                                                                                                                                             | [304] |
| 2015 | User Intervention Based Segmentation of Myocardium In Cardiac Cine MRI Images                                                                                                                     | Shigli, Heenakousar; Tejas, M. H.; Narayan, Lohit; Desai, Shrinivas D.                                                                                                                                                                                                      | [305] |
| 2014 | Metabolic tumour volume and total lesion glycolysis, measured using preoperative 18F-FDG PET/CT, predict the recurrence of endometrial cancer                                                     | Shim, S-H; Kim, D-Y; Lee, D-Y; Lee, S-W; Park, J-Y; Lee, J. J.; Kim, J-H; Kim, Y-M; Kim, Y-T; Nam, J-H                                                                                                                                                                      | [306] |
| 2013 | Medical home characteristics and asthma control: a prospective, observational cohort study protocol                                                                                               | Sills, Marion R.; Kwan, Bethany M.; Yawn, Barbara P.; Sauer, Brian C.; Fairclough, Diane L.; Federico, Monica J.; Juarez-Colunga, Elizabeth; Schilling, Lisa M.                                                                                                             | [307] |
| 2017 | Development of a clinical decision support system for diabetes care: A pilot study                                                                                                                | Sim, Livvi Li Wei; Ban, Kenneth Hon Kim; Tan, Tin Wee; Sethi, Sunil Kumar; Loh, Tze Ping                                                                                                                                                                                    | [308] |
| 2015 | Graphical display of diagnostic test results in electronic health records: a comparison of 8 systems                                                                                              | Sittig, Dean F.; Murphy, Daniel R.; Smith, Michael W.; Russo, Elise; Wright, Adam; Singh, Hardeep                                                                                                                                                                           | [309] |
| 1995 | A MODEL FOR MEDICAL KNOWLEDGE REPRESENTATION APPLICATION TO THE ANALYSIS OF DESCRIPTIVE PATHOLOGY REPORTS                                                                                         | SMART, J. F.; ROUX, M.                                                                                                                                                                                                                                                      | [310] |
| 2001 | Developing indicators for emergency medical services (EMS) system evaluation and quality improvement: a statewide demonstration and planning project                                              | Sobo, E. J.; Andriese, S.; Stroup, C.; Morgan, D.; Kurtin, P.                                                                                                                                                                                                               | [311] |
| 1999 | Predictors of malignancy in childhood peripheral lymphadenopathy                                                                                                                                  | Soldes, O. S.; Younger, J. G.; Hirschl, R. B.                                                                                                                                                                                                                               | [312] |
| 2012 | SympGraph: A Framework for Mining Clinical Notes Through Symptom Relation Graphs                                                                                                                  | Sondhi, Parikshit; Sun, Jimeng; Tong, Hanghang; Zhai, ChengXiang                                                                                                                                                                                                            | [313] |
| 2015 | Visualizing collaborative electronic health record usage for hospitalized patients with heart failure                                                                                             | Soulakis, Nicholas D.; Carson, Matthew B.; Lee, Young Ji; Schneider, Daniel H.; Skeehan, Connor T.; Scholtens, Denise M.                                                                                                                                                    | [314] |

|      |                                                                                                                                                 |                                                                                                                                           |       |
|------|-------------------------------------------------------------------------------------------------------------------------------------------------|-------------------------------------------------------------------------------------------------------------------------------------------|-------|
| 2014 | Sudden survival improvement in critical neurotrauma: An exploratory analysis using a stratified statistical process control technique           | Sovik, Signe; Skaga, Nils Oddvar; Hanoa, Rolf; Eken, Torsten                                                                              | [315] |
| 2006 | Flexible information storage in MUDR(II) EHR                                                                                                    | Spidlen, Josef; Hanzlicek, Petr; Riha, Antonin; Zvarova, Jana                                                                             | [316] |
| 2007 | Algorithms for Efficient Near-Perfect Phylogenetic Tree Reconstruction in Theory and Practice                                                   | Sridhar, Srinath; Dhamdhere, Kedar; Belloch, Guy; Halperin, Eran; Ravi, R.; Schwartz, Russell                                             | [317] |
| 2015 | Modeling Interoperable Information Systems with 3LGM(2) and IHE                                                                                 | Staubert, S.; Schaaf, M.; Jahn, F.; Brandner, R.; Winter, A.                                                                              | [318] |
| 1984 | Map analyses of psychiatric services. The application of a computerized psychiatric case register to geographical analysis                      | Stefansson, C. G.                                                                                                                         | [319] |
| 1989 | Freedom from fat: a contemporary multi-component weight loss program for the general population of obese adults                                 | Stevens, V. J.; Rossner, J.; Greenlick, M.; Stevens, N.; Frankel, H. M.; Craddick, S.                                                     | [320] |
| 1996 | A formal model of family medicine                                                                                                               | Sumner, W. 2nd; Truszczynski, M.; Marek, V. W.                                                                                            | [321] |
| 2014 | Predicting disease associations via biological network analysis                                                                                 | Sun, Kai; Goncalves, Joana P.; Larminie, Chris; Przulj, Natasa                                                                            | [322] |
| 2002 | Academic profiling of tobacco-related performance measures in primary care                                                                      | Swartz, Susan H.; Cowan, Timothy M.; DePue, Judy; Goldstein, Michael G.                                                                   | [323] |
| 2012 | Securing Provenance of Distributed Processes in an Untrusted Environment                                                                        | Syalim, Amril; Nishide, Takashi; Sakurai, Kouichi                                                                                         | [324] |
| 2003 | Gene Expression Data Clustering and Visualization Based on a Binary Hierarchical Clustering Framework                                           | Szeto, Lap Keung; Liew, Alan Wee-Chung; Yan, Hong; Tang, Sy-sen                                                                           | [325] |
| 2002 | Menstrual diary data and menopausal transition: methodologic issues                                                                             | Taffe, John; Dennerstein, Lorraine                                                                                                        | [326] |
| 2014 | Development of a Semi-synthetic Dataset as a Testbed for Big-Data Semantic Analytics                                                            | Techentin, R.; Foti, D.; Li, P.; Daniel, E.; Gilbert, B.; Holmes, D.; Al-Saffar, S.                                                       | [327] |
| 2014 | Lessons learned from the semantic translation of healthcare data                                                                                | Techentin, R.; Sauver, J. S.; Huddleston, J.; Gilbert, B.; Holmes, D.                                                                     | [328] |
| 2011 | Social disparity and intrauterine death: from politics to policies                                                                              | Tezcan, B.; Khazaezadeh, N.; Ash, A.; Oteng-Ntim, E.                                                                                      | [329] |
| 2016 | Psychiatric disorder and work life: A longitudinal study of intra-generational social mobility                                                  | Tiikkaja, Sanna; Sandin, Sven; Hultman, Christina M.; Modin, Bitte; Malki, Ninoa; Sparen, Par                                             | [330] |
| 2016 | Society for Assisted Reproductive Technology and assisted reproductive technology in the United States: a 2016 update                           | Toner, James P.; Coddington, Charles C.; Doody, Kevin; van Voorhis, Brad; Seifer, David B.; Ball, G. David; Luke, Barbara; Wantman, Ethan | [331] |
| 2016 | Design of a Recommendation System for Adding Support in the Treatment of Chronic Patients                                                       | Torkar, Simon; Benedik, Peter; Rajkovic, Uros; Sustersic, Olga; Rajkovic, Vladislav                                                       | [332] |
| 2009 | Assessment of three-level selective perinatal care based on the analysis of early perinatal death rates and cesarean sections in Poland in 2008 | Troszynski, Michal; Niemiec, Tomasz; Wilczynska, Anna                                                                                     | [333] |
| 2015 | Stabilized sparse ordinal regression for medical risk stratification                                                                            | Truyen Tran; Dinh Phung; Luo, Wei; Venkatesh, Svetha                                                                                      | [334] |
| 2002 | Cervix uteri cancer incidence in relation to ethnic situation in Opole province, Poland                                                         | Tukiendorf, A.                                                                                                                            | [335] |
| 2008 | OPTISAS a new method to analyse patients with Sleep Apnea Syndrome                                                                              | Ugon, Adrien; Philippe, Carole; Pietrasz, Slawomir; Ganascia, Jean-Gabriel; Levy, Pierre P.                                               | [336] |
| 2011 | Conditional Anomaly Detection with Soft Harmonic Functions                                                                                      | Valko, Michal; Kveton, Branislav; Valizadegan, Hamed; Cooper, Gregory F.; Hauskrecht, Milos                                               | [337] |
| 2003 | Diagnostic variability in a cohort of patients with multiple admissions in the last two decades                                                 | Vallejo, I. L.; Herrero, H. H.; Sanz, J. J.C.; Martin, J. J.D.; Azarola, E. N.                                                            | [338] |
| 1989 | Appropriate technologies for mother and child health care in developing countries                                                               | Vani, S. N.                                                                                                                               | [339] |
| 2001 | Approximately Common Patterns in Shared-forests                                                                                                 | Vilares, M.; Ribadas, F. J.; Graña, J.                                                                                                    | [340] |
| 2011 | Implementation and learning of laproscopic donor nephrectomy by a non-transplant general surgeon with advanced laparoscopic skills              | Voskoboinik, A.; Gutman, M. J.; Croagh, D.; Bell, R.; Saunder, A.; Gribbin, J.; Kanellis, J.                                              | [341] |



|      |                                                                                                                                        |                                                                                                                                     |       |
|------|----------------------------------------------------------------------------------------------------------------------------------------|-------------------------------------------------------------------------------------------------------------------------------------|-------|
| 2004 | Ictal stuttering - A sign suggestive of psychogenic nonepileptic seizures                                                              | Vossler, D. G.; Am Haltiner; Schepp, S. K.; Friel, P. A.; Caylor, L. M.; Morgan, J. D.; Doherty, M. J.                              | [342] |
| 2004 | Ictal stuttering: a sign suggestive of psychogenic nonepileptic seizures                                                               | Vossler, D. G.; Haltiner, A. M.; Schepp, S. K.; Friel, P. A.; Caylor, L. M.; Morgan, J. D.; Doherty, M. J.                          | [343] |
| 2002 | Use of a computerized tuberculosis register for automated generation of case finding, sputum conversion, and treatment outcome reports | Vranken, R.; Coulombier, D.; Kenyon, T.; Koosimile, B.; Mavunga, T.; Coggin, W.; Binkin, N.                                         | [344] |
| 1991 | Integration of mother and child health services in Ethiopia                                                                            | Walley, J. D.; McDonald, M.                                                                                                         | [345] |
| 2015 | Dynamic Poisson Autoregression for Influenza-Like-Illness Case Count Prediction                                                        | Wang, Zheng; Chakraborty, Prithwish; Mekar, Sumiko R.; Brownstein, John S.; Ye, Jieping; Ramakrishnan, Naren                        | [346] |
| 2016 | Diagnosis Code Assignment Using Sparsity-Based Disease Correlation Embedding                                                           | Wang, Sen; Chang, Xiaojun; Li, Xue; Long, Guodong; Yao, Lina; Sheng, Quan Z.                                                        | [347] |
| 1994 | Combinatorial Pattern Discovery for Scientific Data: Some Preliminary Results                                                          | Wang, Jason Tsong-Li; Chirn, Gung-Wei; Marr, Thomas G.; Shapiro, Bruce; Shasha, Dennis; Zhang, Kaizhong                             | [348] |
| 1994 | Combinatorial Pattern Discovery for Scientific Data: Some Preliminary Results                                                          | Wang, Jason Tsong-Li; Chirn, Gung-Wei; Marr, Thomas G.; Shapiro, Bruce; Shasha, Dennis; Zhang, Kaizhong                             | [349] |
| 2014 | Constructing a Gene Team Tree in Almost $O(N \lg N)$ Time                                                                              | Wang, Biing-Feng; Lin, Chien-Hsin; Yang, I-Tse                                                                                      | [350] |
| 2015 | A Graph Based Methodology for Temporal Signature Identification from HER                                                               | Wang, Fei; Liu, Chuanren; Wang, Yajuan; Hu, Jianying; Yu, Guoqiang                                                                  | [351] |
| 2013 | Exploring Patient Risk Groups with Incomplete Knowledge                                                                                | Wang, X.; Wang, F.; Wang, J.; Qian, B.; Hu, J.                                                                                      | [352] |
| 2010 | Merging health literacy with computer technology: self-managing diet and fluid intake among adult hemodialysis patients                | Welch, Janet L.; Siek, Katie A.; Connelly, Kay H.; Astroth, Kim S.; McManus, M. Sue; Scott, Linda; Heo, Seongkum; Kraus, Michael A. | [353] |
| 2011 | Secular trend of adhesive capsulitis                                                                                                   | White, D.; Choi, H.; Peloquin, C.; Zhu, Y.; Zhang, Y.                                                                               | [354] |
| 2017 | The Social-dance: Decomposing Naturalistic Dyadic Interaction Dynamics to the 'Micro-level'                                            | Whyatt, Caroline P.; Torres, Elizabeth B.                                                                                           | [355] |
| 2010 | Adapting Recommender Systems to the Requirements of Personal Health Record Systems                                                     | Wiesner, Martin; Pfeifer, Daniel                                                                                                    | [356] |
| 1992 | Octrees for Faster Isosurface Generation                                                                                               | Wilhelms, Jane; van Gelder, Allen                                                                                                   | [357] |
| 2007 | 3LGM(2)-Modeling to support management of health information systems                                                                   | Winter, Alfred; Brigl, Birgit; Funkat, Gert; Haeber, Anke; Heller, Oliver; Wendt, Thomas                                            | [358] |
| 2012 | Exploring Flow, Factors, and Outcomes of Temporal Event Sequences with the Outflow Visualization                                       | Wongsuphasawat, Krist; Gotz, David                                                                                                  | [359] |
| 2009 | Refining Phylogenetic Trees Given Additional Data: An Algorithm Based on Parsimony                                                     | Wu, Taoyang; Moulton, Vincent; Steel, Mike                                                                                          | [360] |
| 2016 | Mining Dual Networks: Models, Algorithms, and Applications                                                                             | WU, Yubao; Zhu, Xiaofeng; Li, Li; Fan, Wei; Jin, Ruoming; Zhang, Xiang                                                              | [361] |
| 2010 | Mining positive and negative weighted association rules in medical records without user-specified weights based on HITS model          | Xie, W.; Wu, J.                                                                                                                     | [362] |
| 2018 | Open Knowledge Accessing Method in IoT-based Hospital Information System for Medical Record Enrichment                                 | Xie, C.; Yang, P.; Yang, Y.                                                                                                         | [363] |
| 2017 | Graph Clustering System for Text-Based Records in a Clinical Pathway                                                                   | Yamashita, Takanori; Onimura, Naoya; Soejima, Hidehisa; Nakashima, Naoki; Hirokawa, Sachio                                          | [364] |
| 2013 | Automated system of hess screen for diagnosis of paralytic strabismus using computer aided diagnosis                                   | Yamin, A.; Khan, S. A.; Yasin, U. U.                                                                                                | [365] |
| 2015 | A graph-based method for analyzing electronic medical records                                                                          | Yesha, R.; Gangopadhyay, A.; Siegel, E.                                                                                             | [366] |
| 2017 | Deep Neural Network Based on Translation Model for Diabetes Knowledge Graph                                                            | Yin, S.; Chen, D.; Le J                                                                                                             | [367] |

|      |                                                                                                                                                          |                                                                                                  |       |
|------|----------------------------------------------------------------------------------------------------------------------------------------------------------|--------------------------------------------------------------------------------------------------|-------|
| 2016 | Visualization of Data Regarding Infections Using Eye Tracking Techniques                                                                                 | Yoon, Sunmoo; Cohen, Bevin; Cato, Kenrick D.; Liu, Jianfang; Larson, Elaine L.                   | [368] |
| 2013 | A quantitative method for assessment of prescribing patterns using electronic health records                                                             | Yoon, Dukyong; Park, Inwhee; Schuemie, Martijn J.; Park, Man Young; Kim, Ju Han; Park, Rae Woong | [369] |
| 2009 | Scenario-oriented information extraction from electronic health records                                                                                  | Yousefi, A.; Mastouri, N.; Sartipi, K.                                                           | [370] |
| 2015 | Characterizing chronic disease and polymedication prescription patterns from electronic health records                                                   | Zamora, M.; Baradad, M.; Amado, E.; Codomí, S.; Limón, E.; Ribera, J.; Arias, M.; Gavalda, R.    | [371] |
| 2006 | Information Technology in Health Care Systems: Barriers to Adoption                                                                                      | Zenios, S.                                                                                       | [372] |
| 2017 | HCCN: Heterogeneous Convolutional Neural Networks for Comorbid Risk Prediction with Electronic Health Records                                            | Zhang, J.; Gong, J.; Barnes, L.                                                                  | [373] |
| 2016 | MTPGraph: A Data-Driven Approach to Predict Medical Risk Based on Temporal Profile Graph                                                                 | Zhang, S.; Liu, L.; Li, H.; Xiao, Z.; Cui, L.                                                    | [374] |
| 2013 | Mining Deviations from Patient Care Pathways via Electronic Medical Record System Audits                                                                 | Zhang, He; Mehotra, Sanjay; Liebovitz, David; Gunter, Carl A.; Malin, Bradley                    | [375] |
| 2014 | Towards personalized medicine: leveraging patient similarity and drug similarity analytics                                                               | Zhang, Ping; Wang, Fei; Hu, Jianying; Sorrentino, Robert                                         | [376] |
| 2015 | Cluster-based Epidemic Control Through Smartphone-based Body Area Networks                                                                               | Zhang, Zhaoyang; Wang, Honggang; Wang, Chonggang; Fang, Hua                                      | [377] |
| 2004 | DBMap: a space-conscious data visualization and knowledge discovery framework for biomedical data warehouse                                              | Zhang, Ming; Zhang, Hong; Tjandra, D.; Wong, S. T. C.                                            | [378] |
| 2017 | Mining Medical Causality for Diagnosis Assistance                                                                                                        | Zhao, Sendong                                                                                    | [379] |
| 2016 | Graph-Based Multi-Modality Learning for Clinical Decision Support                                                                                        | Zheng, Ziwei; Wan, Xiaojun                                                                       | [380] |
| 2006 | Approaches to Text Mining for Clinical Medical Records                                                                                                   | Zhou, Xiaohua; Han, Hyoil; Chankai, Isaac; Prestrud, Ann; Brooks, Ari                            | [381] |
| 2006 | Genetic Database Optimization: How Data Inspection and Consideration, Provides for Index Compression and Record Access Optimization of Genetic Databases | Zirkind, Givon                                                                                   | [382] |
| 1994 | MENELAS - AN ACCESS SYSTEM FOR MEDICAL RECORDS USING NATURAL-LANGUAGE                                                                                    | ZWEIGENBAUM, P.                                                                                  | [383] |

## References

1. Abbs v. Sullivan. Fed Report. 1992;963:918–29.
2. Adamusiak T, Shimoyama N, Shimoyama M. Next generation phenotyping using the unified medical language system. *JMIR Med Inform.* 2014;2:e5. doi:10.2196/medinform.3172.
3. Adin CA, Gregory CR, Kyles AE, Cowgill L. Diagnostic predictors of complications and survival after renal transplantation in cats. *VETERINARY SURGERY.* 2001;30:515–21. doi:10.1053/jvet.2001.28418.
4. Agogo GO, van der Voet H, van't Veer P, Ferrari P, Leenders M, Muller DC, et al. Use of two-part regression calibration model to correct for measurement error in episodically consumed foods in a single-replicate study design: EPIC case study. *PLoS One.* 2014;9:e113160. doi:10.1371/journal.pone.0113160.
5. Albarakati N, Obradovic Z. Disease-Based Clustering of Hospital Admission: Disease Network of Hospital Networks Approach. In: ; 2017. p. 636–641. doi:10.1109/CBMS.2017.87.
6. Allali J, Sagot M. A New Distance for High Level RNA Secondary Structure Comparison. *IEEE/ACM Trans. Comput. Biol. Bioinformatics.* 2005;2:3–14. doi:10.1109/TCBB.2005.2.
7. Alvarez JM, Polo L, Jimenez W, Abella P, Labra JE. Application of the Spreading Activation Technique for Recommending Concepts of Well-known Ontologies in Medical Systems. In: New York, NY, USA: ACM; 2011. p. 626–635. doi:10.1145/2147805.2147913.
8. Amit M, Yen TC, Liao CT, Chaturvedi P, Agarwal JP, Kowalski LP, et al. The origin of regional failure in oral cavity squamous cell carcinoma with pathologically negative neck metastases. *JAMA Otolaryngol Head Neck Surg.* 2014;140:1130–7. doi:10.1001/jamaoto.2014.1539.
9. Andersen A. An implementation of secure multi-party computations to preserve privacy when processing EMR data. In: ; 2013. p. 381–384. doi:10.1109/PST.2013.6596096.
10. Andersen A. SNOOP: Privacy Preserving Middleware for Secure Multi-party Computations. In: New York, NY, USA: ACM; 2014. p. 8:1. doi:10.1145/2677017.2677025.

11. Andersen A, Yigzaw KY, Karlsen R. Privacy preserving health data processing. In: ; 2014. p. 225–230. doi:10.1109/HealthCom.2014.7001845.
12. Andreano A, Reborá P, Valsecchi MG, Russo AG. Adherence to guidelines and breast cancer patients survival: a population-based cohort study analyzed with a causal inference approach. *Breast Cancer Res Treat.* 2017;164:119–31. doi:10.1007/s10549-017-4210-z.
13. Anindya IC, Roy H, Kantarcioglu M, Malin B. Building a Dossier on the Cheap: Integrating Distributed Personal Data Resources Under Cost Constraints. In: New York, NY, USA: ACM; 2017. p. 1549–1558. doi:10.1145/3132847.3132951.
14. Antani S. Integrating image and text information for biomedical information retrieval. In: ; 2010. p. 3. doi:10.1109/CBMS.2010.6042631.
15. Antonakakis M, Dimitriadis SI, Zervakis M, Micheloyannis S, Rezaie R, Babajani-Feremi A, et al. Altered cross-frequency coupling in resting-state MEG after mild traumatic brain injury. *Int J Psychophysiol.* 2016;102:1–11. doi:10.1016/j.ijpsycho.2016.02.002.
16. Anwar MN, Oakes MP. Data Mining of Audiology Patient Records: Factors Influencing the Choice of Hearing Aid Type. In: New York, NY, USA: ACM; 2011. p. 11–18. doi:10.1145/2064696.2064701.
17. Anwar MN, Oakes MP. Data mining of audiology patient records: factors influencing the choice of hearing aid type. *BMC Med Inform Decis Mak.* 2012;12 Suppl 1:S6. doi:10.1186/1472-6947-12-S1-S6.
18. Arantes WMd, Verdier C. Public health alert system for health networks: application to cardiology. In: ; 2005. p. 151–154. doi:10.1109/CIC.2005.1588057.
19. Arcilla MJB, Ang VCT, Ochoa MN, Padua CPL, Payawal RE. Kidnew: The Kidney Transplant Patient Personal Health Buddy. In: New York, NY, USA: ACM; 2015. p. 133–134. doi:10.1145/2750511.2750539.
20. Athreya AP, Ngiam KY, Luo Z, Tai ES, Kalbarczyk Z, Iyer RK. Towards Longitudinal Analysis of a Population’s Electronic Health Records Using Factor Graphs. In: ; 2016. p. 79–86.
21. Atif J, Hudelot C, Nempont O, Richard N, Batrancourt B, Angelini E, Bloch I. GRAFIP: A FRAMEWORK FOR THE REPRESENTATION OF HEALTHY AND PATHOLOGICAL CEREBRAL INFORMATION. In: ; 2007. p. 205–208. doi:10.1109/ISBI.2007.356824.
22. Atreja A, Khan S, Rogers JD, Otobo E, Patel NP, Ullman T, et al. Impact of the Mobile HealthPROMISE Platform on the Quality of Care and Quality of Life in Patients With Inflammatory Bowel Disease: Study Protocol of a Pragmatic Randomized Controlled Trial. *JMIR Res Protoc.* 2015;4:e23. doi:10.2196/resprot.4042.
23. Bakel LA, Wilson K, Tyler A, Tham E, Reese J, Bothner J, Kaplan DW. A quality improvement study to improve inpatient problem list use. *Hosp Pediatr.* 2014;4:205–10. doi:10.1542/hpeds.2013-0060.
24. Baptista Macaroff WM, Castroman Espasandin P. Analgesic quality in a postoperative pain service: continuous assessment with the cumulative sum (cusum) method. *Rev Esp Anestesiol Reanim.* 2007;54:11–6.
25. Barsky M, Stege U, Thomo A, Upton C. A Graph Approach to the Threshold All-against-all Substring Matching Problem. *J. Exp. Algorithmics.* 2008;12:1.10:1. doi:10.1145/1227161.1370601.
26. Bassily MN, Wilson R, Pompei F, Burmistrov D. Cancer survival as a function of age at diagnosis: a study of the Surveillance, Epidemiology and End Results database. *Cancer Epidemiol.* 2010;34:667–81. doi:10.1016/j.canep.2010.04.013.
27. Bassoe C. Representing health, disorder and their transitions by digraphs. *Stud Health Technol Inform.* 2008;136:133–8.
28. Baud RH, Am RASSINOX, SCHERRER, JR. NATURAL-LANGUAGE PROCESSING AND SEMANTICAL REPRESENTATION OF MEDICAL TEXTS. *Methods Inf Med.* 1992;31:117–25.
29. Baud RH, Am RASSINOX, WAGNER JC, Lovis C, JUGE C, ALPAY LL, et al. REPRESENTING CLINICAL NARRATIVES USING CONCEPTUAL GRAPHS. *Methods Inf Med.* 1995;34:176–86.
30. Baud RH, Rassinoux AM, Scherrer JR. Natural language processing and semantical representation of medical texts. *Methods Inf Med.* 1992;31:117–25.
31. Bean DM, Wu H, Iqbal E, Dzahini O, Ibrahim ZM, Broadbent M, et al. Knowledge graph prediction of unknown adverse drug reactions and validation in electronic health records. *Sci Rep.* 2017;7:16416. doi:10.1038/s41598-017-16674-x.
32. Bean DM, Wu H, Iqbal E, Dzahini O, Ibrahim ZM, Broadbent M, et al. Author Correction: Knowledge graph prediction of unknown adverse drug reactions and validation in electronic health records. *Sci Rep.* 2018;8:4284. doi:10.1038/s41598-018-22521-4.
33. Beilin LJ, Bulpitt CJ, Coles EC, Dollery CT, Johnson BF, Mearns C, et al. Computer-based hypertension clinic records: a co-operative study. *Br Med J.* 1974;2:212–6.
34. Bellin E, Kalkut G. Is time-slice analysis superior to total hospital length of stay in demonstrating the effectiveness of a month-long intensive effort on a medicine service? *Qual Manag Health Care.* 2004;13:143–9.
35. Benedik P, Rajkovic U, Sustersic O. Toward the design of a nursing ontology system. *Comput Inform Nurs.* 2014;32:580–8. doi:10.1097/CIN.0000000000000117.
36. Bereg S, Zhang Y. Phylogenetic Networks Based on the Molecular Clock Hypothesis. *IEEE/ACM Trans. Comput. Biol. Bioinformatics.* 2007;4:661–7. doi:10.1109/tcbb.2007.1043.
37. Bernauer J, Franz M, Schoop D, Schoop M, Pretschner DP. The compositional approach for representing medical concept systems. *Medinfo.* 1995;8 Pt 1:70–4.
38. Bertrand D, Gascuel O. Topological Rearrangements and Local Search Method for Tandem Duplication Trees. *IEEE/ACM Trans. Comput. Biol. Bioinformatics.* 2005;2:15–28. doi:10.1109/TCBB.2005.15.

39. Bingham A. Computerized patient records benefit physician offices. *Healthc Financ Manage.* 1997;51:68–70.
40. Bono B de, Helvensteijn M, Kokash N, Martorelli I, Sarwar D, Islam S, et al. Requirements for the formal representation of pathophysiology mechanisms by clinicians. *INTERFACE FOCUS* 2016. doi:10.1098/rsfs.2015.0099.
41. Bordewich M, Gascuel O, Huber KT, Moulton V. Consistency of Topological Moves Based on the Balanced Minimum Evolution Principle of Phylogenetic Inference. *IEEE/ACM Trans. Comput. Biol. Bioinformatics.* 2009;6:110–7. doi:10.1109/TCBB.2008.37.
42. Brewer NT, Gilkey MB, Lillie SE, Hesse BW, Sheridan SL. Tables or bar graphs? Presenting test results in electronic medical records. *Med Decis Making.* 2012;32:545–53. doi:10.1177/0272989X12441395.
43. Britto MT, Jimison HB, Munafo JK, Wissman J, Rogers ML, Hersh W. Usability testing finds problems for novice users of pediatric portals. *J Am Med Inform Assoc.* 2009;16:660–9. doi:10.1197/jamia.M3154.
44. Brown AL. Constructing Chromosome Scale Suffix Trees. In: Darlinghurst, Australia, Australia: Australian Computer Society, Inc; 2004. p. 105–112.
45. Brunson JC, Laubenbacher RC. Applications of network analysis to routinely collected health care data: a systematic review. *JOURNAL OF THE AMERICAN MEDICAL INFORMATICS ASSOCIATION.* 2018;25:210–21. doi:10.1093/jamia/ocx052.
46. Buchtela D, Anger Z, Peleska J, Vesely A, Zvarova J. Presentation of medical guidelines on a computer. *Stud Health Technol Inform.* 2004;105:166–71.
47. Bui AAT, Taira RK, Churchill B, Kangaroo H. Integrated visualization of problemcentric urologic patient records. *Ann N Y Acad Sci.* 2002;980:267–77.
48. Burgess HA. Use of the labor graph in Malawi. *J Nurse Midwifery.* 1986;31:46–52.
49. Butch SH. Practical use of computerized hospital information systems to improve blood transfusion. *Am J Clin Pathol.* 1997;107:S50-6.
50. CAMPBELL KE, DAS AK, MUSEN MA. A LOGICAL FOUNDATION FOR REPRESENTATION OF CLINICAL-DATA. *JOURNAL OF THE AMERICAN MEDICAL INFORMATICS ASSOCIATION.* 1994;1:218–32. doi:10.1136/jamia.1994.95236154.
51. Campbell WS, Pedersen J, McClay JC, Rao P, Bastola D, Campbell JR. An alternative database approach for management of SNOMED CT and improved patient data queries. *J Biomed Inform.* 2015;57:350–7. doi:10.1016/j.jbi.2015.08.016.
52. Cates W, JR. Legal abortion: the public health record. *Science.* 1982;215:1586–90.
53. Cen S, Han L, Ma J. Ranking Weblogs by Analyzing Reading and Commenting Activities. In: Washington, DC, USA: IEEE Computer Society; 2009. p. 442–449. doi:10.1109/WI-IAT.2009.77.
54. Chan DJ, Furner V, Smith DE, Dronavalli M, Bopage RI, Post JJ, Bhardwaj AK. Non-AIDS complexity amongst patients living with HIV in Sydney: risk factors and health outcomes. *AIDS Res Ther.* 2018;15:6. doi:10.1186/s12981-018-0193-z.
55. Chazelle B. Technical Perspective: Finding a Good Neighbor, Near and Fast. *Commun. ACM.* 2008;51:115. doi:10.1145/1327452.1327493.
56. Chen L, Li X, Sheng QZ, Peng WC, Bennett J, Hu HY, Huang N. Mining Health Examination Records #x2014;A Graph-Based Approach. *IEEE TRANSACTIONS ON KNOWLEDGE AND DATA ENGINEERING.* 2016;28:2423–37. doi:10.1109/TKDE.2016.2561278.
57. Chen J, Poon J, Poon SK, Xu L, Sze DMY. Mining Symptom-Herb Patterns from Patient Records Using Tripartite Graph. *Evid Based Complement Alternat Med.* 2015;2015:435085. doi:10.1155/2015/435085.
58. Chen P, Zhao T, Feng R, Chai J, Tong G, Wang D. Patterns and trends with cancer incidence and mortality rates reported by the China National Cancer Registry. *Asian Pac J Cancer Prev.* 2014;15:6327–32.
59. Chennamsetty H, Chalasani S, Riley D. Predictive analytics on Electronic Health Records (EHRs) using Hadoop and Hive. In: ; 2015. p. 1–5. doi:10.1109/ICECCT.2015.7226129.
60. Choi E, Bahadori MT, Le Song, Stewart WF, Sun J. GRAM: Graph-based Attention Model for Healthcare Representation Learning. In: New York, NY, USA: ACM; 2017. p. 787–795. doi:10.1145/3097983.3098126.
61. Christinat Y, Moret BME. A Transcript Perspective on Evolution. *IEEE/ACM Trans. Comput. Biol. Bioinformatics.* 2013;10:1403–11. doi:10.1109/TCBB.2012.145.
62. Christofidis MJ, Hill A, Horswill MS, Watson MO. Observation charts with overlapping blood pressure and heart rate graphs do not yield the performance advantage that health professionals assume: an experimental study. *J Adv Nurs.* 2014;70:610–24. doi:10.1111/jan.12223.
63. Chung HH, Kim JW, Kang KW, Park N, Song Y, Chung J, Kang S. Post-treatment (1)(8)FFDG maximum standardized uptake value as a prognostic marker of recurrence in endometrial carcinoma. *Eur J Nucl Med Mol Imaging.* 2011;38:74–80. doi:10.1007/s00259-010-1614-y.
64. Cimino JJ, Clayton PD, Hripcsak G, Johnson SB. Knowledge-based approaches to the maintenance of a large controlled medical terminology. *J Am Med Inform Assoc.* 1994;1:35–50.
65. Collier T, Steenkamp R, Tomson C, Caskey F, Ansell D, Roderick P, Nitsch D. Patterns and effects of missing comorbidity data for patients starting renal replacement therapy in England, Wales and Northern Ireland. *Nephrol Dial Transplant.* 2011;26:3651–8. doi:10.1093/ndt/gfr111.

66. Cota E, Ribeiro L, Bezerra JS, Costa A, da Silva RE, Cota G. Using formal methods for content validation of medical procedure documents. *Int J Med Inform.* 2017;104:10–25. doi:10.1016/j.ijmedinf.2017.04.012.
67. Cruz JP, Libatique NJ, Tangonan G. Steganography and data hiding in flash video (FLV). In: ; 2012. p. 1–6. doi:10.1109/TENCON.2012.6412279.
68. Cypko MA, Wojdziaek J, Stoehr M, Kirchner B, Preim B, Dietz A, et al. Visual Verification of Cancer Staging for Therapy Decision Support. *COMPUTER GRAPHICS FORUM.* 2017;36:109–20. doi:10.1111/cgf.13172.
69. da Silva Klahr P, Correa Coronel C, Cabral Robinson C, Fonseca JM, Dias Flores C, Della Mea Plentz R. Influence Diagram As a Support Tool for Clinical Decisions In Cardiopulmonary And Metabolic Rehabilitation. *Stud Health Technol Inform.* 2015;216:290–4.
70. Dabek F, Caban JJ. A grammar-based approach to model the patient's clinical trajectory after a mild traumatic brain injury. In: ; 2015. p. 723–730. doi:10.1109/BIBM.2015.7359775.
71. Dabek F, Chen J, Garbarino A, Caban JJ. Visualization of Longitudinal Clinical Trajectories Using a Graph-based Approach. In: New York, NY, USA: ACM; 2015. p. 5:1. doi:10.1145/2836034.2836039.
72. Dahl MR, Vedsted P. Personal data and confidentiality on the Internet. *Ugeskr Laeger.* 2008;170:4027–9.
73. Danaei G, Garcia Rodriguez LA, Fernandez Cantero O, Logan R, Hernan MA. Observational data for comparative effectiveness research: An emulation of randomised trials of statins and primary prevention of coronary heart disease. *STATISTICAL METHODS IN MEDICAL RESEARCH.* 2013;22:70–96. doi:10.1177/0962280211403603.
74. Datla V, Hasan SA, Qadir A, Lee K, Ling Y, Liu J, Farri O. Automated clinical diagnosis: The role of content in various sections of a clinical document. In: ; 2017. p. 1004–1011. doi:10.1109/BIBM.2017.8217794.
75. Davidson S, Natan D, Novikov I, Sokolover N, Erlich A, Shamir R. Body mass index and weight-for-length ratio references for infants born at 33-42 weeks gestation: a new tool for anthropometric assessment. *Clin Nutr.* 2011;30:634–9. doi:10.1016/j.clnu.2011.03.010.
76. Degnan JH, Rosenberg NA, Stadler T. A Characterization of the Set of Species Trees That Produce Anomalous Ranked Gene Trees. *IEEE/ACM Trans. Comput. Biol. Bioinformatics.* 2012;9:1558–68. doi:10.1109/TCBB.2012.110.
77. Delman BS. A problem-oriented approach to journal selection for hospital libraries. *Bull Med Libr Assoc.* 1982;70:397–410.
78. Dent RM, Penwarden RM, Harris N, Hotz SB. Development and evaluation of patient-centered software for a weight-management clinic. *OBESITY RESEARCH.* 2002;10:651–6. doi:10.1038/oby.2002.88.
79. Dhulekar N, Oztan B, Yener B, Bingol HO, Irim G, Aktekin B, Aykut-Bingöl C. Graph-theoretic Analysis of Epileptic Seizures on Scalp EEG Recordings. In: New York, NY, USA: ACM; 2014. p. 155–163. doi:10.1145/2649387.2649423.
80. Dietz KR, Zhang L, Seidel FG. The transverse diameter of the chest on routine radiographs reliably estimates gestational age and weight in premature infants. *Pediatr Radiol.* 2015;45:1303–7. doi:10.1007/s00247-015-3332-x.
81. Diprose GK, Evans DH, Levene MI. A microcomputer monitoring and data-acquisition system for intensive care units. *J Med Eng Technol.* 1985;9:80–4.
82. Edsberg O, Nordbo SJ, Vinnes E, Nytro O. Design and evaluation of a temporal, graph-based language for querying collections of patient histories. *Stud Health Technol Inform.* 2007;129:402–6.
83. Elliott D, Allen E, McKinley S, Perry L, Duffield C, Fry M, et al. User acceptance of observation and response charts with a track and trigger system: a multisite staff survey. *J Clin Nurs.* 2016;25:2211–22. doi:10.1111/jocn.13303.
84. Engholm G, Ferlay J, Christensen N, Bray F, Gjerstorff ML, Klint A, et al. NORDCAN--a Nordic tool for cancer information, planning, quality control and research. *Acta Oncol.* 2010;49:725–36. doi:10.3109/02841861003782017.
85. Erkal S, Gerberich SG, Ryan AD, Renier CM, Alexander BH. Animal-related injuries: a population-based study of a five-state region in the upper Midwest: Regional Rural Injury Study II. *J Safety Res.* 2008;39:351–63. doi:10.1016/j.jsr.2008.03.002.
86. Esteban C, Schmidt D, Krompaß D, Tresp V. Predicting Sequences of Clinical Events by Using a Personalized Temporal Latent Embedding Model. In: ; 2015. p. 130–139. doi:10.1109/ICHI.2015.23.
87. Evandt J, Oftedal B, Krog NH, Skurtveit S, Nafstad P, Schwarze PE, et al. Road traffic noise and registry based use of sleep medication. *Environ Health.* 2017;16:110. doi:10.1186/s12940-017-0330-5.
88. Evans JM, MacDonald TM. Misclassification and selection bias in case-control studies using an automated database. *Pharmacoepidemiol Drug Saf.* 1997;6:313–8. doi:10.1002/(SICI)1099-1557(199709/10)6:5<313::AID-PDS292>3.0.CO;2-K.
89. Faeder JR, Blinov ML, Hlavacek WS. Graphical Rule-based Representation of Signal-transduction Networks. In: New York, NY, USA: ACM; 2005. p. 133–140. doi:10.1145/1066677.1066712.
90. Faloutsos C. Future Directions in Data Mining: Streams, Networks, Self-similarity and Power Laws. In: New York, NY, USA: ACM; 2002. p. 93. doi:10.1145/584792.584794.

91. Faloutsos C, Kamel I. Beyond Uniformity and Independence: Analysis of R-trees Using the Concept of Fractal Dimension. In: New York, NY, USA: ACM; 1994. p. 4–13. doi:10.1145/182591.182593.
92. Fan K, Eisenberg M, Walsh A, Aiello A, Heller K. Hierarchical Graph-Coupled HMMs for Heterogeneous Personalized Health Data. In: New York, NY, USA: ACM; 2015. p. 239–248. doi:10.1145/2783258.2783326.
93. Farfan F, Hristidis V, Ranganathan A, Burke RP. Ontology-Aware Search on XML-based Electronic Medical Records. In: ; 2008. p. 1525–1527. doi:10.1109/ICDE.2008.4497611.
94. Fazeli Dehkordy S, Carlos RC, Hall KS, Dalton VK. Novel data sources for women's health research: mapping breast screening online information seeking through Google trends. *Acad Radiol*. 2014;21:1172–6. doi:10.1016/j.acra.2014.05.005.
95. Feng J, Zhu D. Faster Algorithms for Sorting by Transpositions and Sorting by Block Interchanges. *ACM Trans. Algorithms* 2007. doi:10.1145/1273340.1273341.
96. Ferreira TS, Luiz de Souza-Braga A, Soraia Cavalcanti-Valente G, Ferreira de Souza D, Moreira Carvalho-Alves E. Nursing audit: The impact of nursing annotation in the context of hospital gloss. *AQUICHAN*. 2009;9:38–49.
97. Finlayson SG, LePendou P, Shah NH. Building the graph of medicine from millions of clinical narratives. *Sci Data*. 2014;1:140032. doi:10.1038/sdata.2014.32.
98. Finney JM, Walker AS, Peto TEA, Wyllie DH. An efficient record linkage scheme using graphical analysis for identifier error detection. *BMC Med Inform Decis Mak*. 2011;11:7. doi:10.1186/1472-6947-11-7.
99. Flack JR. Seven years experience with a computerized diabetes clinic database. *Medinfo*. 1995;8 Pt 1:332.
100. Florit AM, Mori AR, Simone M de, d'Annunzio V, Ricci FL, Lalle C. Context trees: representing co-operative healthcare activities in IREP. *Comput Methods Programs Biomed*. 1995;48:175–81.
101. Folio LR, Machado LB, Dwyer AJ. Multimedia-enhanced Radiology Reports: Concept, Components, and Challenges. *Radiographics*. 2018;38:462–82. doi:10.1148/rg.2017170047.
102. Forister JFY, Sun A, Weissman BA. Progress report on a post-radial keratotomy patient 20 years after surgery. *Eye Contact Lens*. 2007;33:334–7. doi:10.1097/ICL.0b013e318030f1b6.
103. Fors UG, Sandberg HC. Computer-aided risk management--a software tool for the Hidep model. *Quintessence Int*. 2001;32:309–20.
104. Fraccaro P, Vigo M, Balatsoukas P, van der Veer, Sabine N., Hassan L, Williams R, et al. Presentation of laboratory test results in patient portals: influence of interface design on risk interpretation and visual search behaviour. *BMC Med Inform Decis Mak* 2018. doi:10.1186/s12911-018-0589-7.
105. Frazier GF. An Incremental Algorithm for Building Temporal Quadrees. In: New York, NY, USA: ACM; 1993. p. 446–452. doi:10.1145/170791.170896.
106. Friesen MR, Hamel C, McLeod RD. A mHealth application for chronic wound care: findings of a user trial. *Int J Environ Res Public Health*. 2013;10:6199–214. doi:10.3390/ijerph10116199.
107. Gail MH, Costantino JP, Pee D, Bondy M, Newman L, Selvan M, et al. Projecting individualized absolute invasive breast cancer risk in African American women. *J Natl Cancer Inst*. 2007;99:1782–92. doi:10.1093/jnci/djm223.
108. Galopin A, Bouaud J, Pereira S, Seroussi B. Using an ontological modeling to evaluate the consistency of clinical practice guidelines: application to the comparison of three guidelines on the management of adult hypertension. *Stud Health Technol Inform*. 2014;205:38–42.
109. Galopin A, Bouaud J, Pereira S, Seroussi B. An Ontology-Based Clinical Decision Support System for the Management of Patients with Multiple Chronic Disorders. *Stud Health Technol Inform*. 2015;216:275–9.
110. Garla V, Taylor C, Brandt C. Semi-supervised clinical text classification with Laplacian SVMs: an application to cancer case management. *J Biomed Inform*. 2013;46:869–75. doi:10.1016/j.jbi.2013.06.014.
111. Garrett WF, Fuchs H, Whitton MC, State A. Real-time Incremental Visualization of Dynamic Ultrasound Volumes Using Parallel BSP Trees. In: Los Alamitos, CA, USA: IEEE Computer Society Press; 1996. p. 235–ff.
112. Gerson CD, Gerson M. Technical report: an ePRO patient reported outcome program for the evaluation of patients with irritable bowel syndrome. *Neurogastroenterol Motil*. 2014;26:290–4. doi:10.1111/nmo.12255.
113. Gevins AS, Yeager CL, Diamond SL. Interactive Analysis and Display of the Electroencephalogram (EEG) in Real Time. In: New York, NY, USA: ACM; 1974. p. 75–76. doi:10.1145/563182.563233.
114. Ghosh P, Kalyanaraman A. A Fast Sketch-based Assembler for Genomes. In: New York, NY, USA: ACM; 2016. p. 241–250. doi:10.1145/2975167.2975192.
115. Giani U, Brascio G, Bruzzese D, Garzillo C, Vigilante S. Emotional and cognitive information processing in web-based medical education. *J Biomed Inform*. 2007;40:332–42. doi:10.1016/j.jbi.2006.11.004.
116. Gibson TA, Goldberg DS. Evaluating Theoretical Models of Protein Interaction Network Evolution Without Seed Graphs. In: New York, NY, USA: ACM; 2013. p. 724:724. doi:10.1145/2506583.2512388.
117. Glinkowski W. Web-Based Support for Fracture Healing Evaluation and Monitoring. *TELEMEDICINE AND E-HEALTH*. 2011;17:201–10. doi:10.1089/tmj.2010.0131.
118. Goldstein A, Shahar Y. An automated knowledge-based textual summarization system for longitudinal, multivariate clinical data. *J Biomed Inform*. 2016;61:159–75. doi:10.1016/j.jbi.2016.03.022.



119. Goodwin T, Harabagiu SM. Automatic Generation of a Qualified Medical Knowledge Graph and Its Usage for Retrieving Patient Cohorts from Electronic Medical Records. In: ; 2013. p. 363–370. doi:10.1109/ICSC.2013.68.
120. Goodwin T, Harabagiu S. Embedding Open-domain Common-sense Knowledge from Text. LREC Int Conf Lang Resour Eval. 2016;2016:4621–8.
121. Goodwin TR, Harabagiu SM. Medical Question Answering for Clinical Decision Support. Proc ACM Int Conf Inf Knowl Manag. 2016;2016:297–306. doi:10.1145/2983323.2983819.
122. Goodwin TR, Harabagiu SM. Knowledge Representations and Inference Techniques for Medical Question Answering. ACM TRANSACTIONS ON INTELLIGENT SYSTEMS AND TECHNOLOGY 2018. doi:10.1145/3106745.
123. Gopakumar S, Tran T, Nguyen TD, Phung D, Venkatesh S. Stabilizing high-dimensional prediction models using feature graphs. IEEE J Biomed Health Inform. 2015;19:1044–52. doi:10.1109/JBHI.2014.2353031.
124. Gortzis LG, Nikiforidis G. Tracing and cataloguing knowledge in an e-health cardiology environment. J Biomed Inform. 2008;41:217–23. doi:10.1016/j.jbi.2007.09.001.
125. Grinspan ZM, Abramson EL, Banerjee S, Kern LM, Kaushal R, Shapiro JS. Potential value of health information exchange for people with epilepsy: crossover patterns and missing clinical data. AMIA Annu Symp Proc. 2013;2013:527–36.
126. Gunter C. Detecting Roles and Anomalies in Hospital Access Audit Logs. In: New York, NY, USA: ACM; 2014. p. 1. doi:10.1145/2665936.2668879.
127. Guzzi PH, Mina M. Towards the Assessment of Semantic Similarity Analysis of Protein Data: Main Approaches and Issues. ACM SIGBioinformatics Rec. 2012;2:17–8. doi:10.1145/2384691.2384694.
128. Hackney DN, Knudtson EJ, Rossi KQ, Krugh D, O'Shaughnessy RW. Management of pregnancies complicated by anti-c isoimmunization. Obstet Gynecol. 2004;103:24–30. doi:10.1097/01.AOG.0000109206.22354.2C.
129. Halachev M, Shiri N, Thamildurai A. Exact Match Search in Sequence Data Using Suffix Trees. In: New York, NY, USA: ACM; 2005. p. 123–130. doi:10.1145/1099554.1099579.
130. Hanzlicek P, Spidlen J, Nagy M. Universal electronic health record MUDR. Stud Health Technol Inform. 2004;105:190–201.
131. Hanzlicek P, Spidlen J, Heroutova H, Nagy M. User interface of MUDR electronic health record. Int J Med Inform. 2005;74:221–7. doi:10.1016/j.ijmedinf.2004.06.003.
132. Harabagiu S. Big mechanisms for processing big data in medical informatics. In: ; 2015. p. 1–2. doi:10.1109/SPMB.2015.7405440.
133. Harris J. Next Generation Linkage Management System. In: Darlinghurst, Australia, Australia: Australian Computer Society, Inc; 2013. p. 7–12.
134. Harsola A, Thale S, Panse MS. Low Cost Digital Stethoscope for Heart Sounds. In: New York, NY, USA: ACM; 2011. p. 1275–1279. doi:10.1145/1980022.1980304.
135. Hartzler AL, Izard JP, Dalkin BL, Mikles SP, Gore JL. Design and feasibility of integrating personalized PRO dashboards into prostate cancer care. JOURNAL OF THE AMERICAN MEDICAL INFORMATICS ASSOCIATION. 2016;23:38–47. doi:10.1093/jamia/ocv101.
136. Hausler R, Washburn D, Rey P, Stefanoff F. Acquiring otoneurological results by computer. Evaluation after 2 years of experience. Ann Otolaryngol Chir Cervicofac. 1982;99:403–8.
137. Heer J, Perer A. Orion: A system for modeling, transformation and visualization of multidimensional heterogeneous networks. INFORMATION VISUALIZATION. 2014;13:111–33. doi:10.1177/1473871612462152.
138. Henry SB, Mead CN. Nursing classification systems: necessary but not sufficient for representing "what nurses do" for inclusion in computer-based patient record systems. J Am Med Inform Assoc. 1997;4:222–32.
139. Henzinger MR, King V, Warnow T. Constructing a Tree from Homeomorphic Subtrees, with Applications to Computational Evolutionary Biology. In: Philadelphia, PA, USA: Society for Industrial and Applied Mathematics; 1996. p. 333–340.
140. Herman T, Pemmaraju SV, Segre AM, Polgreen PM, Curtis DE, Fries J, et al. Wireless Applications for Hospital Epidemiology. In: New York, NY, USA: ACM; 2009. p. 45–50. doi:10.1145/1540373.1540384.
141. Herskovic JR, Subramanian D, Cohen T, Bozzo-Silva PA, Bearden CF, Bernstam EV. Graph-based signal integration for high-throughput phenotyping. BMC Bioinformatics. 2012;13 Suppl 13:S2. doi:10.1186/1471-2105-13-S13-S2.
142. Hettne K, Soiland-Reyes S, Klyne G, Belhajjame K, Gamble M, Bechhofer S, et al. Workflow Forever: Semantic Web Semantic Models and Tools for Preserving and Digitally Publishing Computational Experiments. In: New York, NY, USA: ACM; 2012. p. 36–37. doi:10.1145/2166896.2166909.
143. Hofer C, Kiechl S, Lang W. The Austrian Stroke-Unit-Registry. Wien Med Wochenschr. 2008;158:411–7. doi:10.1007/s10354-008-0563-6.
144. Hoimyr H, Christensen TD, Emmertsen K, Johnsen SP, Riis A, Hansen OK, Hjortdal VE. Surgical repair of coarctation of the aorta: up to 40 years of follow-up. Eur J Cardiothorac Surg. 2006;30:910–6. doi:10.1016/j.ejcts.2006.09.016.
145. Honglan L, Xiaona Q, Bin F. The Symptoms and Pathogenesis Entity Recognition of TCM Medical Records Based on CRF. In: ; 2015. p. 1479–1484. doi:10.1109/UIC-ATC-ScalCom-CBDCom-IoP.2015.267.

146. Hripcsak G, Soulakis ND, Li L, Morrison FP, Lai AM, Friedman C, et al. Syndromic surveillance using ambulatory electronic health records. *J Am Med Inform Assoc.* 2009;16:354–61. doi:10.1197/jamia.M2922.
147. Huang H, Gong T, Ye N, Wang R, Dou Y. Private and Secured Medical Data Transmission and Analysis for Wireless Sensing Healthcare System. *IEEE Transactions on Industrial Informatics.* 2017;13:1227–37. doi:10.1109/TII.2017.2687618.
148. Huesch MD, Schetter S, Segel J, Chetlen A. Evaluation of the “Angelina Jolie Effect” on Screening Mammography Utilization in an Academic Center. *JOURNAL OF THE AMERICAN COLLEGE OF RADIOLOGY.* 2017;14:1020–6. doi:10.1016/j.jacr.2017.03.016.
149. Huet B, Artigou JY, Poirier J, Blain G. Meta-modelling: the appropriate solution for a family of applications. *Stud Health Technol Inform.* 2001;84:623–7.
150. Huet B, Pourriat JL, Martin J, Cupa M. An automaton computer program for a microcomputerized real-time (thesaurus based) abstract medical record. *Comput Programs Biomed.* 1982;15:117–23.
151. Islam SKH, Khan MK, Li X. Security Analysis and Improvement of ‘a More Secure Anonymous User Authentication Scheme for the Integrated EPR Information System’. *PLoS One* 2015. doi:10.1371/journal.pone.0131368.
152. Italian cancer figures, report 2012: Cancer in children and adolescents. *Epidemiol Prev.* 2013;37:1–225.
153. Jacky JP, Kalet IJ. An Object-oriented Programming Discipline for Standard Pascal. *Commun. ACM.* 1987;30:772–6. doi:10.1145/30401.30403.
154. Jamakovic M, Baljic R. Significance of copper level in serum and routine laboratory parameters in estimation of outspreading of Hodgkin's lymphoma. *Med Arch.* 2013;67:185–7.
155. Jamil HM, Modica GA, Teran MA. Towards a Visual Query Interface for Phylogenetic Databases. In: New York, NY, USA: ACM; 2001. p. 57–64. doi:10.1145/502585.502596.
156. Jamison RN, Jurcik DC, Edwards RR, Huang C, Ross EL. A Pilot Comparison of a Smartphone App With or Without 2-Way Messaging Among Chronic Pain Patients: Who Benefits From a Pain App? *Clin J Pain.* 2017;33:676–86. doi:10.1097/AJP.0000000000000455.
157. Jeunemaitre X, Degoulet P, Morice V, Chatellier G, Devries C, Plouin PF, et al. Testing an expert system for hypertension. *Arch Mal Coeur Vaiss.* 1986;79:808–12.
158. Ji X, Ae Chun S, Geller J. Predicting Comorbid Conditions and Trajectories using Social Health Records. *IEEE Trans Nanobioscience* 2016. doi:10.1109/TNB.2016.2564299.
159. Jiang J, Li X, Zhao C, Guan Y, Yu Q. Learning and inference in knowledge-based probabilistic model for medical diagnosis. *KNOWLEDGE-BASED SYSTEMS.* 2017;138:58–68. doi:10.1016/j.knosys.2017.09.030.
160. Jing X, Cimino JJ. A complementary graphical method for reducing and analyzing large data sets. Case studies demonstrating thresholds setting and selection. *Methods Inf Med.* 2014;53:173–85. doi:10.3414/ME13-01-0075.
161. Jupin J, Shi JY. Identity Tracking in Big Data: Preliminary Research Using In-Memory Data Graph Models for Record Linkage and Probabilistic Signature Hashing for Approximate String Matching in Big Health and Human Services Databases. In: New York, NY, USA: ACM; 2014. p. 20:1. doi:10.1145/2640087.2644170.
162. Kamkar I, Gupta S, Li C, Phung D, Venkatesh S. Stable clinical prediction using graph support vector machines. In: ; 2016. p. 3332–3337. doi:10.1109/ICPR.2016.7900148.
163. Kaur K, Rani R. Managing Data in Healthcare Information Systems: Many Models, One Solution. *Computer.* 2015;48:52–9. doi:10.1109/MC.2015.77.
164. Kavuluru R, Han S, Harris D. Unsupervised Extraction of Diagnosis Codes from EMRs Using Knowledge-Based and Extractive Text Summarization Techniques. *Adv Artif Intell (2013).* 2013;7884:77–88. doi:10.1007/978-3-642-38457-8\_7.
165. Kawada T, Aoki S, Suzuki S. Management of personal health examination data for a population by use of a portable computer. *Nihon Koshu Eisei Zasshi.* 1992;39:105–7.
166. Kay M, Choe EK, Shepherd J, Greenstein B, Watson N, Consolvo S, Kientz JA. Lullaby: A Capture & Access System for Understanding the Sleep Environment. In: New York, NY, USA: ACM; 2012. p. 226–234. doi:10.1145/2370216.2370253.
167. Kazmierczak SC, Leen TK, Erdogmus D, Carreira-Perpinan MA. Reduction of multi-dimensional laboratory data to a two-dimensional plot: a novel technique for the identification of laboratory error. *Clin Chem Lab Med.* 2007;45:749–52. doi:10.1515/CCLM.2007.177.
168. Keenan GM, Lopez KD, Yao Y, Sousa VEC, Stifter J, Febretti A, et al. Toward Meaningful Care Plan Clinical Decision Support: Feasibility and Effects of a Simulated Pilot Study. *Nurs Res.* 2017;66:388–98. doi:10.1097/NNR.0000000000000234.
169. Kennedy I, Ritter H. Antenatal records: do they help us? A new record for watching fetal growth. *Trop Doct.* 1984;14:130–2. doi:10.1177/004947558401400310.
170. Kennedy I, Stephens B. A novel antenatal record to help midwives. *Practitioner.* 1979;223:18–24.
171. Kerschberger B, Hilderbrand K, Bouille AM, Coetzee D, Goemaere E, Azevedo V de, van Cutsem G. The effect of complete integration of HIV and TB services on time to initiation of antiretroviral therapy: a before-after study. *PLoS One.* 2012;7:e46988. doi:10.1371/journal.pone.0046988.
172. Khan IA. Personalized Electronic Health Record System for Monitoring Patients with Chronic Disease. In: ; 2013. p. 121–126. doi:10.1109/SIEDS.2013.6549505.
173. Khan A, Bhowmick SS, Bonchi F. Summarizing Static and Dynamic Big Graphs. *Proc. VLDB Endow.* 2017;10:1981–4. doi:10.14778/3137765.3137825.
174. Khan A, Elnikety S. Systems for Big-graphs. *Proc. VLDB Endow.* 2014;7:1709–10. doi:10.14778/2733004.2733067.

175. Klann JG, McCoy AB, Wright A, Wattanasin N, Sittig DF, Murphy SN. Health care transformation through collaboration on open-source informatics projects: integrating a medical applications platform, research data repository, and patient summarization. *Interact J Med Res*. 2013;2:e11. doi:10.2196/ijmr.2454.
176. Klann JG, Szolovits P, Downs SM, Schadow G. Decision support from local data: creating adaptive order menus from past clinician behavior. *J Biomed Inform*. 2014;48:84–93. doi:10.1016/j.jbi.2013.12.005.
177. Kofler J, Pesenhofer R, Landl G, Sommerfeld-Stur I, Peham C. Monitoring of dairy cow claw health status in 15 herds using the computerised documentation program Claw Manager and digital parameters. *Tierarztl Prax Ausg G Grosstiere Nutztiere*. 2013;41:31–44.
178. Koopman B. Semantic Search As Inference: Applications in Health Informatics. *SIGIR Forum*. 2014;48:116–7. doi:10.1145/2701583.2701601.
179. Koopman B, Zuccon G, Bruza P, Sitbon L, Lawley M. Graph-based Concept Weighting for Medical Information Retrieval. In: New York, NY, USA: ACM; 2012. p. 80–87. doi:10.1145/2407085.2407096.
180. Kourtis G, Caiaffa M, Forte C, Scarlato MI, Macchia L. Retrospective monitoring in the management of persistent asthma. *Respir Care*. 2011;56:633–43. doi:10.4187/respcare.00796.
181. Kraus S, Castellanos I, Albermann M, Schuettler C, Prokosch H, Staudigel M, Toddenroth D. Using Arden Syntax for the Generation of Intelligent Intensive Care Discharge Letters. *Stud Health Technol Inform*. 2016;228:471–5.
182. Kushniruk A, Borycki E, Anderson JG, Anderson MM. Combining Two Forms of Simulation to Predict the Potential Impact of Interface Design on Technology-induced Error in Healthcare. In: San Diego, CA, USA: Society for Computer Simulation International; 2008. p. 497–504.
183. Kwon Y, Kang K, Bae C, Chung H, Kim JH. Lifelog agent for human activity pattern analysis on health avatar platform. *Healthc Inform Res*. 2014;20:69–75. doi:10.4258/hir.2014.20.1.69.
184. Labarre A, Verwer S. Merging Partially Labelled Trees: Hardness and a Declarative Programming Solution. *IEEE/ACM Trans. Comput. Biol. Bioinformatics*. 2014;11:389–97. doi:10.1109/TCBB.2014.2307200.
185. Lancia G, Carr R, Walenz B, Istrail S. 101 Optimal PDB Structure Alignments: A Branch-and-cut Algorithm for the Maximum Contact Map Overlap Problem. In: New York, NY, USA: ACM; 2001. p. 193–202. doi:10.1145/369133.369199.
186. Landes SJ, Carlson EB, Ruzek JI, Wang D, Hugo E, DeGaetano N, et al. Provider-Driven Development of a Measurement Feedback System to Enhance Measurement-Based Care in VA Mental Health. *COGNITIVE AND BEHAVIORAL PRACTICE*. 2015;22:87–100. doi:10.1016/j.cbpra.2014.06.004.
187. Lee HJ, Kim JY, Kim SK, Lee JR, Suh CS, Kim SH. Learning Curve Analysis and Surgical Outcomes of Single-port Laparoscopic Myomectomy. *J Minim Invasive Gynecol*. 2015;22:607–11. doi:10.1016/j.jmig.2015.01.009.
188. Levin RJ. Incidence of thyroid cancer in residents surrounding the Three Mile Island nuclear facility. *Laryngoscope*. 2008;118:618–28. doi:10.1097/MLG.0b013e3181613ad2.
189. Lezcano L, Sanchez-Alonso S, Sicilia M. Associating clinical archetypes through UMLS Metathesaurus term clusters. *J Med Syst*. 2012;36:1249–58. doi:10.1007/s10916-010-9586-9.
190. Liabsuetrakul T, Prappre T, Pairoi P, Oumudee N, Islam M. Development of a web-based epidemiological surveillance system with health system response for improving maternal and newborn health: Field-testing in Thailand. *Health Informatics J*. 2017;23:109–23. doi:10.1177/1460458216628312.
191. Lieberman MD, Taheri S, Guo w, Mirrashed F, Yahav I, Aris A, Shneiderman B. Visual Exploration Across Biomedical Databases. *IEEE/ACM Trans. Comput. Biol. Bioinformatics*. 2011;8:536–50. doi:10.1109/TCBB.2010.1.
192. Lin YL, Guerguerian A, Tomasi J, Laussen P, Trbovich P. Usability of data integration and visualization software for multidisciplinary pediatric intensive care: a human factors approach to assessing technology. *BMC Med Inform Decis Mak* 2017. doi:10.1186/s12911-017-0520-7.
193. Lin H, Wang Y, Jing L, Chang P. Mockup design of personal health diary app for patients with chronic kidney disease. *Stud Health Technol Inform*. 2014;201:124–32.
194. Liu W, Chung BC, Wang R, Ng J, Morlet N. A genetic algorithm enabled ensemble for unsupervised medical term extraction from clinical letters. *Health Inf Sci Syst*. 2015;3:5. doi:10.1186/s13755-015-0013-y.
195. Liu H, Dou D, Jin R, Lependu P, Shah N. Mining Biomedical Ontologies and Data Using RDF Hypergraphs. In: ; 2013. p. 141–146. doi:10.1109/ICMLA.2013.31.
196. Liu Y, Guo Z, Ke X, Zaiane OR. Protein Subcellular Localization Prediction with Associative Classification and Multi-class SVM. In: New York, NY, USA: ACM; 2011. p. 493–495. doi:10.1145/2147805.2147880.
197. Liu C, Wang F, Hu J, Xiong H. Temporal Phenotyping from Longitudinal Electronic Health Records: A Graph Based Framework. In: New York, NY, USA: ACM; 2015. p. 705–714. doi:10.1145/2783258.2783352.
198. Liu JM, Wu HW, Chen WS, Lin WC, Chao Y, Lui WY, Whang-Peng J. Integration of computer-assembled digital images and text data as evidence for the oncological record. *J Digit Imaging*. 2000;13:55–9.
199. Loorak MH, Perin C, Kamal N, Hill M, Carpendale S. TimeSpan: Using Visualization to Explore Temporal Multi-dimensional Data of Stroke Patients. *IEEE Trans Vis Comput Graph*. 2016;22:409–18. doi:10.1109/TVCG.2015.2467325.

200. Lopez KD, Wilkie DJ, Yao Y, Sousa V, Febretti A, Stifter J, et al. Nurses' Numeracy and Graphical Literacy: Informing Studies of Clinical Decision Support Interfaces. *J Nurs Care Qual.* 2016;31:124–30. doi:10.1097/NCQ.000000000000149.
201. Lovis C, Baud RH, Revillard C, Pult L, Borst F, Geissbuhler A. Paragraph-oriented structure for narratives in medical documentation. *Stud Health Technol Inform.* 2001;84:638–42.
202. Luo Y, Xin Y, Hochberg E, Joshi R, Uzuner O, Szolovits P. Subgraph augmented non-negative tensor factorization (SANTF) for modeling clinical narrative text. *J Am Med Inform Assoc.* 2015;22:1009–19. doi:10.1093/jamia/ocv016.
203. Luque-Fernandez MA, Zoega H, Valdimarsdottir U, Williams MA. Deconstructing the smoking-preeclampsia paradox through a counterfactual framework. *Eur J Epidemiol.* 2016;31:613–23. doi:10.1007/s10654-016-0139-5.
204. Luz S, Kane B. Classification of Patient Case Discussions Through Analysis of Vocalisation Graphs. In: New York, NY, USA: ACM; 2009. p. 107–114. doi:10.1145/1647314.1647334.
205. Madkour M, Song H, Du Jingcheng, Tao C. A representational analysis of a temporal indeterminacy display in clinical events. In: ; 2016. p. 1089–1095. doi:10.1109/BIBM.2016.7822673.
206. Mandal AK, Sarkar A. Formal representation of service interactions for SaaS based applications. In: ; 2014. p. 54–59. doi:10.1109/ICADIWT.2014.6814700.
207. Manzi de Arantes, Wilmondes Jr, Verdier C. Defining quality-measurable medical alerts from incomplete data through fuzzy linguistic variables and modifiers. *IEEE Trans Inf Technol Biomed.* 2010;14:916–22. doi:10.1109/TITB.2009.2020063.
208. Margusino-Framinan L, Cid-Silva P, Mena-de-Cea A, Sanclaudio-Luhia AI, Castro-Castro JA, Vazquez-Gonzalez G, Martin-Herranz I. Intelligent MONitoring System for antiviral pharmacotherapy in patients with chronic hepatitis C (SiMON-VC). *Farm Hosp.* 2017;41:68–88. doi:10.7399/fh.2017.41.1.10590.
209. Markazi-Moghaddam N, Arab M, Ravaghi H, Rashidian A, Khatibi T, Zargar Balaye Jame S. A Knowledge Map for Hospital Performance Concept: Extraction and Analysis: A Narrative Review Article. *Iran J Public Health.* 2016;45:843–54.
210. Martin GS, Tapsell LC, Batterham MJ, Russell KG. Relative bias in diet history measurements: a quality control technique for dietary intervention trials. *Public Health Nutr.* 2002;5:537–45. doi:10.1079/PHN2002329.
211. Martinez D, Otegi A, Soroa A, Agirre E. Improving search over Electronic Health Records using UMLS-based query expansion through random walks. *J Biomed Inform.* 2014;51:100–6. doi:10.1016/j.jbi.2014.04.013.
212. Martinez-Costa C, Schulz S. Validating EHR clinical models using ontology patterns. *J Biomed Inform.* 2017;76:124–37. doi:10.1016/j.jbi.2017.11.001.
213. Matthews SJ. Heterogeneous Compression of Large Collections of Evolutionary Trees. *IEEE/ACM Trans. Comput. Biol. Bioinformatics.* 2015;12:807–14. doi:10.1109/TCBB.2014.2366756.
214. Mattson DC, Yang J. The Child Therapy Tracking System (CTTS): A model for an expressive therapy electronic health record (EHR). *ARTS IN PSYCHOTHERAPY.* 2013;40:509–18. doi:10.1016/j.aip.2013.08.002.
215. Meamarzadeh H, Khayambashi MR, Saraee MH. Extracting Temporal Rules from Medical Data. In: ; 2009. p. 327–331. doi:10.1109/ICCTD.2009.72.
216. Mechkour M, Mulhem P, Fourel F, Berrut EFC. PRIME-GC. A medical information retrieval prototype on the Web. In: ; 1997. p. 2–9. doi:10.1109/RIDE.1997.583681.
217. Mendonça EA, Johnson SB, Seol Y, Cimino JJ. Analyzing the Semantics of Patient Data to Rank Records of Literature Retrieval. In: Stroudsburg, PA, USA: Association for Computational Linguistics; 2002. p. 69–76. doi:10.3115/1118149.1118159.
218. Meystre SM, Lee S, Jung CY, Chevrier RD. Common data model for natural language processing based on two existing standard information models: CDA+GrAF. *J Biomed Inform.* 2012;45:703–10. doi:10.1016/j.jbi.2011.11.018.
219. Milicchio F, Tradigo G, Veltri P, Prospero M. High-performance Data Structures for De Novo Assembly of Genomes: Cache Oblivious Generic Programming. In: New York, NY, USA: ACM; 2016. p. 657–662. doi:10.1145/2975167.2985691.
220. Mirshahi A, Kohnen T. Scientific evaluation and quality assurance in refractive surgical interventions. Evaluation of the Datagraph med computer program. *Ophthalmologie.* 2002;99:629–35.
221. Mirzaei M, Truswell AS, Arnett K, Page A, Taylor R, Leeder SR. Cerebrovascular disease in 48 countries: secular trends in mortality 1950-2005. *J Neurol Neurosurg Psychiatry.* 2012;83:138–45. doi:10.1136/jnnp-2011-300408.
222. Mondal S, Mukherjee N. Mobile-assisted remote healthcare delivery. In: ; 2016. p. 630–635. doi:10.1109/PDGC.2016.7913199.
223. Monsen KA, Banerjee A, Das P. Discovering client and intervention patterns in home visiting data. *West J Nurs Res.* 2010;32:1031–54. doi:10.1177/0193945910370970.
224. Morin P, Herrmann F, Ammann P, Uebelhart B, Rizzoli R. A rapid self-administered food frequency questionnaire for the evaluation of dietary protein intake. *Clin Nutr.* 2005;24:768–74. doi:10.1016/j.clnu.2005.03.002.
225. Moruzzi M. The new culture of dematerialized health. *Recenti Prog Med.* 2014;105:407–9. doi:10.1701/1680.18398.
226. Mossel E, Roch S, Steel M. Shrinkage Effect in Ancestral Maximum Likelihood. *IEEE/ACM Trans. Comput. Biol. Bioinformatics.* 2009;6:126–33. doi:10.1109/TCBB.2008.107.
227. Mzhayskiy V, Miller B, Ma K, Tagkopoulos I. A Scalable Multi-scale Framework for Parallel Simulation and Visualization of Microbial Evolution. In: New York, NY, USA: ACM; 2011. p. 7:1. doi:10.1145/2016741.2016749.

228. Muller R. The CliniCon framework for context representation in electronic patient records. *Proc AMIA Annu Fall Symp.* 1997;178–82.
229. Muller R. The CliniCon framework for context representation in electronic patient records. *JOURNAL OF THE AMERICAN MEDICAL INFORMATICS ASSOCIATION.* 1997;178–82.
230. Muller R, Serfl M, Nauwerth U, Schoppe D, Pommerening K, Dittrich HM. THEMPO: a knowledge-based system for therapy planning in pediatric oncology. *Comput Biol Med.* 1997;27:177–200.
231. Muller R, Thews O, Rohrbach C, Serfl M, Pommerening K. A graph-grammar approach to represent causal, temporal and other contexts in an oncological patient record. *Methods Inf Med.* 1996;35:127–41.
232. Murphy CA, Carstens K, Villamayor P. Electronic growth charts: watching our patients grow. *AMIA Annu Symp Proc.* 2005:1058.
233. Mwaniki P, Ayieko P, Todd J, English M. Assessment of paediatric inpatient care during a multifaceted quality improvement intervention in Kenyan district hospitals--use of prospectively collected case record data. *BMC Health Serv Res.* 2014;14:312. doi:10.1186/1472-6963-14-312.
234. Myleus A, Stenlund H, Hernell O, Gothefors L, Hammarstrom M, Persson L, Ivarsson A. Early vaccinations are not risk factors for celiac disease. *Pediatrics.* 2012;130:e63-70. doi:10.1542/peds.2011-2806.
235. Nagar A, Al-Mubaid H, Bettayeb S. Computing Gene Functional Similarity Using Combined Graphs. In: New York, NY, USA: ACM; 2012. p. 1381–1386. doi:10.1145/2245276.2231995.
236. Newell SD, JR, Englert J, Box-Taylor A, Davis KM, Koch KE. Clinical efficiency tools improve stroke management in a rural southern health system. *Stroke.* 1998;29:1092–8.
237. Ng K, Ghoting A, Steinhubl SR, Stewart WF, Malin B, Sun J. PARAMO: a PARALLEL predictive MOdeling platform for healthcare analytic research using electronic health records. *J Biomed Inform.* 2014;48:160–70. doi:10.1016/j.jbi.2013.12.012.
238. Ni J, Fei H, Fan W, Zhang X. Automated Medical Diagnosis by Ranking Clusters Across the Symptom–Disease Network. In: ; 2017. p. 1009–1014. doi:10.1109/ICDM.2017.130.
239. Nielsen F. A Fielded Wiki for Personality Genetics. In: New York, NY, USA: ACM; 2010. p. 16:1. doi:10.1145/1832772.1832795.
240. Nikfarjam A, Emadzadeh E, Gonzalez G. Towards generating a patient's timeline: extracting temporal relationships from clinical notes. *J Biomed Inform.* 2013;46 Suppl:S40-7. doi:10.1016/j.jbi.2013.11.001.
241. Norén GN, Bate A, Hopstadius J, Star K, Edwards IR. Temporal Pattern Discovery for Trends and Transient Effects: Its Application to Patient Records. In: New York, NY, USA: ACM; 2008. p. 963–971. doi:10.1145/1401890.1402005.
242. Noren GN, Hopstadius J, Bate A, Star K, Edwards IR. Temporal pattern discovery in longitudinal electronic patient records. *DATA MINING AND KNOWLEDGE DISCOVERY.* 2010;20:361–87. doi:10.1007/s10618-009-0152-3.
243. Nori N, Kashima H, Yamashita K, Ikai H, Imanaka Y. Simultaneous Modeling of Multiple Diseases for Mortality Prediction in Acute Hospital Care. In: New York, NY, USA: ACM; 2015. p. 855–864. doi:10.1145/2783258.2783308.
244. Nose Y, Akazawa K, Watanabe Y, Yokota M, Okamura S, Maehara Y, Sugimachi K. Cancer registration using case history database in hospital information system. *Jpn Hosp.* 1988;7:21–8.
245. Ogushi Y, Haruki Y, Okada Y, Takahashi M, Shimizu M, Izumi Y, et al. Development and evaluation of regional health database systems. *Stud Health Technol Inform.* 1998;52 Pt 2:1297–300.
246. Okamoto K, Tanaka H, Takemura T, Kume N, Kuroda T, Yoshihara H. A hypothesis-generating support system using medical records for clinical knowledge acquisition. In: ; 2012. p. 1130–1133. doi:10.1109/SCIS-ISIS.2012.6505123.
247. Oladimeji EA, Chung L, Jung HT, Kim J. Managing Security and Privacy in Ubiquitous eHealth Information Interchange. In: New York, NY, USA: ACM; 2011. p. 26:1. doi:10.1145/1968613.1968645.
248. O'Neil M, Payne C, Read J. Read Codes Version 3: a user led terminology. *Methods Inf Med.* 1995;34:187–92.
249. Onimura N, Yamashita T, Nakayama N, Soejima H, Hirokawa S. Generation of Sentence Template Graph from SOAP Format Medical Documents. In: ; 2016. p. 159–162. doi:10.1109/CSCI.2016.0037.
250. Orban K, Edberg A, Erlandsson L. Using a time-geographical diary method in order to facilitate reflections on changes in patterns of daily occupations. *Scand J Occup Ther.* 2012;19:249–59. doi:10.3109/11038128.2011.620981.
251. Oshiro T, Oshiro H, Tanimizu M. Effective methods of organizing complex information in advanced cancer patients. *Gan To Kagaku Ryoho.* 2014;41 Suppl 1:26–9.
252. Osler M, Prescott E, Wium-Andersen IK, Ibfelt EH, Jorgensen MB, Andersen PK, et al. The Impact of Comorbid Depression on Educational Inequality in Survival after Acute Coronary Syndrome in a Cohort of 83 062 Patients and a Matched Reference Population. *PLoS One.* 2015;10:e0141598. doi:10.1371/journal.pone.0141598.
253. Osop H, Sahama T. Electronic health records: Improvement to healthcare decision-making. In: ; 2016. p. 1–6. doi:10.1109/HealthCom.2016.7749474.
254. O'Sullivan EM. International variation in the incidence of oral and pharyngeal cancer. *Community Dent Health.* 2008;25:148–53.
255. Pabón MC, Montoya GA, Millán M. Mediation and graph data models for medical data integration. In: ; 2013. p. 1–9. doi:10.1109/CLEI.2013.6670647.
256. Parkin DM, Ferlay J, Curado M, Bray F, Edwards B, Shin H, Forman D. Fifty years of cancer incidence: CI5 I-IX. *Int J Cancer.* 2010;127:2918–27. doi:10.1002/ijc.25517.

257. Pathak J, Kiefer RC, Chute CG. Mining drug-drug interaction patterns from linked data: A case study for Warfarin, Clopidogrel, and Simvastatin. In: ; 2013. p. 23–30. doi:10.1109/BIBM.2013.6732595.
258. Patil R, Karandikar RG. Digital signal preservation approaches of archived biomedical paper records #x2014; A review. In: ; 2016. p. 1–4. doi:10.1109/WECON.2016.7993456.
259. Paulson EH, Gerberich SG, Alexander BH, Ryan A, Renier CM, Zhang X, et al. Fall-related injuries among agricultural household members: Regional Rural Injury Study II (RRIS-II). *J Occup Environ Med.* 2006;48:959–68. doi:10.1097/01.jom.0000225110.89501.a3.
260. Pawloski P, Cusick D, Amborn L. Development of clinical pharmacy productivity metrics. *AMERICAN JOURNAL OF HEALTH-SYSTEM PHARMACY.* 2012;69:49–54. doi:10.2146/ajhp110126.
261. Payne TH, Andrews RD, Breeling J, Ben Davoren J, Smith RM, Volpp B. Graphing clinical events in the VA Computerized Patient Record System. *JOURNAL OF THE AMERICAN MEDICAL INFORMATICS ASSOCIATION.* 1999:1137.
262. Pedreschi D. Social Network Analytics, Data Science Ethics & Privacy-preserving Analytics. In: New York, NY, USA: ACM; 2017. doi:10.1145/3168836.3168841.
263. Penfield W. Physicians take to the field. *IDRC Rep.* 1992;20:28–30.
264. Pfeiffer KP. Actual state and perspectives of e-health in Austria and international--an overview. *Wien Med Wochenschr.* 2011;161:334–40. doi:10.1007/s10354-011-0008-5.
265. Pfundner A, Schnoebgen T, Horn J, Boyce RD, Samwald M. Utilizing the Wikidata System to Improve the Quality of Medical Content in Wikipedia in Diverse Languages: A Pilot Study. *JOURNAL OF MEDICAL INTERNET RESEARCH* 2015. doi:10.2196/jmir.4163.
266. Pietrzyk PM. Free text analysis. *Int J Biomed Comput.* 1995;39:139–44.
267. Poon-Chue A, Menendez L, Gerstner MM, Colletti P, Terk M. MRI evaluation of post-operative seromas in extremity soft tissue sarcomas. *SKELETAL RADIOLOGY.* 1999;28:279–82. doi:10.1007/s002560050516.
268. Poscia R, Ghio S, D'Alto M, Vitulo P, Mule M, Albera C, et al. 'Real-life' information on pulmonary arterial hypertension: the iPHnet Project. *Curr Med Res Opin.* 2014;30:2409–14. doi:10.1185/03007995.2014.960514.
269. Pourriat JL, Huet B, Gabry AL, Rolland C, Cupa M. Case summaries in real-time. Accomplishments with a microcomputer. *Ann Fr Anesth Reanim.* 1982;1:161–5.
270. Poursadegh M, Poursadegh F, Esmaeili M, Bakhshae M. Epidemiological Survey of Sinonasal Malignancy in North-East Iran. *Iran J Otorhinolaryngol.* 2015;27:225–9.
271. Powsner SM, Tuftte ER. Summarizing clinical psychiatric data. *Psychiatr Serv.* 1997;48:1458–61. doi:10.1176/ps.48.11.1458.
272. Preece MHW, Hill A, Horswill MS, Karamatic R, Watson MO. Designing observation charts to optimize the detection of patient deterioration: reliance on the subjective preferences of healthcare professionals is not enough. *Aust Crit Care.* 2012;25:238–52. doi:10.1016/j.aucc.2012.01.003.
273. Pryor J. A snapshot of rehabilitation referrals in rural New South Wales. *Aust Health Rev.* 2010;34:204–9. doi:10.1071/AH08713.
274. Puentes J, Batrancourt B, Atif J, Angelini E, Lecornu L, Zemirline A, et al. Integrated multimedia electronic patient record and graph-based image information for cerebral tumors. *Comput Biol Med.* 2008;38:425–37. doi:10.1016/j.compbiomed.2008.01.009.
275. Rajagopalan MR, Vellaipandiyar S. Big data framework for national E-governance plan. In: ; 2013. p. 1–5. doi:10.1109/ICTKE.2013.6756283.
276. Rakic N. Acute sensorineural hearing loss at the Otorhinolaryngology Department of the General Hospital in Subotica 1991-1996. *Med Pregl.* 1999;52:44–52.
277. RAMAYYA GP. AXAUDIT - ANESTHETIC AUDIT SYSTEM. *INTERNATIONAL JOURNAL OF CLINICAL MONITORING AND COMPUTING.* 1992;9:149–58. doi:10.1007/BF01145167.
278. Rassinoux AM, Michel PA, Wagner J, Baud R. Current trends with natural language processing. *Medinfo.* 1995;8 Pt 2:1657.
279. Rathe JC, Elliott PF. A cancer registry for the community radiation center. *Cancer.* 1979;43:198–204.
280. Ratib O. From multimodality digital imaging to multimedia patient record. *Comput Med Imaging Graph.* 1994;18:59–65.
281. Reiz B, Csato L. Bayesian Network Classifier for Medical Data Analysis. *INTERNATIONAL JOURNAL OF COMPUTERS COMMUNICATIONS & CONTROL.* 2009;4:65–72. doi:10.15837/ijccc.2009.1.2414.
282. Rhea S, Weber DJ, Poole C, Cairns C. Risk factors for hospitalization after dog bite injury: a case-cohort study of emergency department visits. *Acad Emerg Med.* 2014;21:196–203. doi:10.1111/acem.12312.
283. Rizvi SZR, Fong PW. Interoperability of Relationship- and Role-Based Access Control. In: New York, NY, USA: ACM; 2016. p. 231–242. doi:10.1145/2857705.2857706.
284. Rizvi SZR, Fong PW, Crampton J, Sellwood J. Relationship-Based Access Control for an Open-Source Medical Records System. In: New York, NY, USA: ACM; 2015. p. 113–124. doi:10.1145/2752952.2752962.
285. Rocha J. Graph Comparison by Log-Odds Score Matrices with Application to Protein Topology Analysis. *IEEE/ACM Trans. Comput. Biol. Bioinformatics.* 2011;8:564–9. doi:10.1109/TCBB.2010.59.
286. Rodnick JE. The use of automated ambulatory medical records. *J Fam Pract.* 1977;5:253–64.
287. Rothwell DJ, Cote RA, Cordeau JP, Boisvert MA. Developing a standard data structure for medical language--the SNOMED proposal. *Proc Annu Symp Comput Appl Med Care.* 1993:695–9.



288. Rotmensch M, Halpern Y, Tlimat A, Horng S, Sontag D. Learning a Health Knowledge Graph from Electronic Medical Records. *Sci Rep.* 2017;7:5994. doi:10.1038/s41598-017-05778-z.
289. Ruiz JG, Andrade AD, Hogue C, Karanam C, Akkineni S, Cevallos D, et al. The Association of Graph Literacy With Use of and Skills Using an Online Personal Health Record in Outpatient Veterans. *J Health Commun.* 2016;21:83–90. doi:10.1080/10810730.2016.1193915.
290. Ryu I, Siio I. TongueDx: A Tongue Diagnosis for Health Care on Smartphones. In: New York, NY, USA: ACM; 2014. p. 25:1. doi:10.1145/2582051.2582076.
291. Săcărea C, Șotropa D, Troancă D. Symptoms investigation by means of formal concept analysis for enhancing medical diagnoses. In: ; 2017. p. 1–5. doi:10.23919/SOFTCOM.2017.8115588.
292. Salinas O, Cosio G de, Clavel-Arcas C, Montoya J, Serpas M, Moran de Garcia S, Concha-Eastman A. An information system for injuries from external causes (SILEX): a successful project in El Salvador. *Rev Panam Salud Publica.* 2008;24:390–9.
293. Sato D, Freitas A. Understanding quality in data from hospital diagnosis and procedures: A statistical characterization. In: ; 2010. p. 1–4.
294. Sauleau EA, Paumier J, Buemi A. Medical record linkage in health information systems by approximate string matching and clustering. *BMC Med Inform Decis Mak.* 2005;5:32. doi:10.1186/1472-6947-5-32.
295. Schenk RJ, JR, Schenk J. Integration of remote blood glucose meter upload technology into a clinical pharmacist medication therapy management service. *J Diabetes Sci Technol.* 2011;5:188–91. doi:10.1177/193229681100500126.
296. Schultz SE, Rothwell DM, Chen Z, Tu K. Identifying cases of congestive heart failure from administrative data: a validation study using primary care patient records. *Chronic Dis Inj Can.* 2013;33:160–6.
297. Schultz SE, Rothwell DM, Chen Z, Tu K. Identifying cases of congestive heart failure from administrative data: a validation study using primary care patient records. *Chronic Dis Inj Can.* 2013;33:160–6.
298. Sevick MA, Zickmund S, Korytkowski M, Piraino B, Sereika S, Mihalko S, et al. Design, feasibility, and acceptability of an intervention using personal digital assistant-based self-monitoring in managing type 2 diabetes. *Contemp Clin Trials.* 2008;29:396–409. doi:10.1016/j.cct.2007.09.004.
299. Shahn Z, Ryan P, Madigan D. Predicting Health Outcomes from High-Dimensional Longitudinal Health Histories Using Relational Random Forests. *STATISTICAL ANALYSIS AND DATA MINING.* 2015;8:128–36. doi:10.1002/sam.11268.
300. Sharit J, Lisigurski M, Andrade AD, Karanam C, Nazi KM, Lewis JR, Ruiz JG. The Roles of Health Literacy, Numeracy, and Graph Literacy on the Usability of the VA's Personal Health Record by Veterans. *J Usability Studies.* 2014;9:173–93.
301. Shaverdian AA, Zhou H, Michailidis G, Jagadish HV. Algebraic Visual Analysis: The Catalano Phone Call Data Set Case Study. In: New York, NY, USA: ACM; 2009. p. 74–82. doi:10.1145/1562849.1562858.
302. Shaw JLV, Cohen A, Konforte D, Binesh-Marvasti T, Colantonio DA, Adeli K. Validity of establishing pediatric reference intervals based on hospital patient data: a comparison of the modified Hoffmann approach to CALIPER reference intervals obtained in healthy children. *Clin Biochem.* 2014;47:166–72. doi:10.1016/j.clinbiochem.2013.11.008.
303. Sheridan J, Chamberlain K, Dupuis A. Timelining: visualizing experience. *QUALITATIVE RESEARCH.* 2011;11:552–69. doi:10.1177/1468794111413235.
304. Shibuya T. Geometric Suffix Tree: Indexing Protein 3-D Structures. *J. ACM.* 2010;57:15:1. doi:10.1145/1706591.1706595.
305. Shigli H, Tejas MH, Narayan L, Desai SD. User Intervention Based Segmentation of Myocardium In Cardiac Cine MRI Images. In: New York, NY, USA: ACM; 2015. p. 684–689. doi:10.1145/2791405.2791545.
306. Shim S, Kim D, Lee D, Lee S, Park J, Lee JJ, et al. Metabolic tumour volume and total lesion glycolysis, measured using preoperative 18F-FDG PET/CT, predict the recurrence of endometrial cancer. *BJOG.* 2014;121:1097-106; discussion 1106. doi:10.1111/1471-0528.12543.
307. Sills MR, Kwan BM, Yawn BP, Sauer BC, Fairclough DL, Federico MJ, et al. Medical home characteristics and asthma control: a prospective, observational cohort study protocol. *EGEMS (Wash DC).* 2013;1:1032. doi:10.13063/2327-9214.1032.
308. Sim LLW, Ban KHK, Tan TW, Sethi SK, Loh TP. Development of a clinical decision support system for diabetes care: A pilot study. *PLoS One.* 2017;12:e0173021. doi:10.1371/journal.pone.0173021.
309. Sittig DF, Murphy DR, Smith MW, Russo E, Wright A, Singh H. Graphical display of diagnostic test results in electronic health records: a comparison of 8 systems. *J Am Med Inform Assoc.* 2015;22:900–4. doi:10.1093/jamia/ocv013.
310. SMART JF, ROUX M. A MODEL FOR MEDICAL KNOWLEDGE REPRESENTATION APPLICATION TO THE ANALYSIS OF DESCRIPTIVE PATHOLOGY REPORTS. *Methods Inf Med.* 1995;34:352–60.
311. Sobo EJ, Andriese S, Stroup C, Morgan D, Kurtin P. Developing indicators for emergency medical services (EMS) system evaluation and quality improvement: a statewide demonstration and planning project. *Jt Comm J Qual Improv.* 2001;27:138–54.
312. Soldes OS, Younger JG, Hirschl RB. Predictors of malignancy in childhood peripheral lymphadenopathy. *J Pediatr Surg.* 1999;34:1447–52.

313. Sondhi P, Sun J, Tong H, Zhai C. SympGraph: A Framework for Mining Clinical Notes Through Symptom Relation Graphs. In: New York, NY, USA: ACM; 2012. p. 1167–1175. doi:10.1145/2339530.2339712.
314. Soulakis ND, Carson MB, Lee YJ, Schneider DH, Skeehan CT, Scholtens DM. Visualizing collaborative electronic health record usage for hospitalized patients with heart failure. *J Am Med Inform Assoc.* 2015;22:299–311. doi:10.1093/jamia/ocu017.
315. Sovik S, Skaga NO, Hanoa R, Eken T. Sudden survival improvement in critical neurotrauma: An exploratory analysis using a stratified statistical process control technique. *Injury.* 2014;45:1722–30. doi:10.1016/j.injury.2014.05.038.
316. Spidlen J, Hanzlicek P, Riha A, Zvarova J. Flexible information storage in MUDR(II) EHR. *Int J Med Inform.* 2006;75:201–8. doi:10.1016/j.ijmedinf.2005.07.044.
317. Sridhar S, Dhamdhare K, Belloch G, Halperin E, Ravi R, Schwartz R. Algorithms for Efficient Near-Perfect Phylogenetic Tree Reconstruction in Theory and Practice. *IEEE/ACM Trans. Comput. Biol. Bioinformatics.* 2007;4:561–71. doi:10.1109/TCBB.2007.1070.
318. Staubert S, Schaaf M, Jahn F, Brandner R, Winter A. Modeling Interoperable Information Systems with 3LGM(2) and IHE. *Methods Inf Med.* 2015;54:398–405. doi:10.3414/ME14-02-0027.
319. Stefansson CG. Map analyses of psychiatric services. The application of a computerized psychiatric case register to geographical analysis. *Acta Psychiatr Scand.* 1984;70:515–22.
320. Stevens VJ, Rossner J, Greenlick M, Stevens N, Frankel HM, Craddick S. Freedom from fat: a contemporary multi-component weight loss program for the general population of obese adults. *J Am Diet Assoc.* 1989;89:1254–8.
321. Sumner W2, Truszczynski M, Marek VW. A formal model of family medicine. *J Am Board Fam Pract.* 1996;9:41–52.
322. Sun K, Goncalves JP, Larminie C, Przulj N. Predicting disease associations via biological network analysis. *BMC Bioinformatics* 2014. doi:10.1186/1471-2105-15-304.
323. Swartz SH, Cowan TM, DePue J, Goldstein MG. Academic profiling of tobacco-related performance measures in primary care. *Nicotine Tob Res.* 2002;4 Suppl 1:S38-44. doi:10.1080/14622200210128018.
324. Syalim A, Nishide T, Sakurai K. Securing Provenance of Distributed Processes in an Untrusted Environment. *IEICE TRANSACTIONS ON INFORMATION AND SYSTEMS.* 2012;E95D:1894–907. doi:10.1587/transinf.E95.D.1894.
325. Szeto LK, Liew AW, Yan H, Tang S. Gene Expression Data Clustering and Visualization Based on a Binary Hierarchical Clustering Framework. In: Darlinghurst, Australia, Australia: Australian Computer Society, Inc; 2003. p. 145–152.
326. Taffe J, Dennerstein L. Menstrual diary data and menopausal transition: methodologic issues. *Acta Obstet Gynecol Scand.* 2002;81:588–94.
327. Techentin R, Foti D, Li P, Daniel E, Gilbert B, Holmes D, Al-Saffar S. Development of a Semi-synthetic Dataset as a Testbed for Big-Data Semantic Analytics. In: ; 2014. p. 252–253. doi:10.1109/ICSC.2014.45.
328. Techentin R, Sauver JS, Huddleston J, Gilbert B, Holmes D. Lessons learned from the semantic translation of healthcare data. In: ; 2014. p. 513–518. doi:10.1109/HealthCom.2014.7001895.
329. Tezcan B, Khazaezadeh N, Ash A, Oteng-Ntim E. Social disparity and intrauterine death: from politics to policies. *J Obstet Gynaecol.* 2011;31:507–8. doi:10.3109/01443615.2011.587910.
330. Tiikkaja S, Sandin S, Hultman CM, Modin B, Malki N, Sparen P. Psychiatric disorder and work life: A longitudinal study of intra-generational social mobility. *Int J Soc Psychiatry.* 2016;62:156–66. doi:10.1177/0020764015614594.
331. Toner JP, Coddington CC, Doody K, van Voorhis B, Seifer DB, Ball GD, et al. Society for Assisted Reproductive Technology and assisted reproductive technology in the United States: a 2016 update. *Fertil Steril.* 2016;106:541–6. doi:10.1016/j.fertnstert.2016.05.026.
332. Torkar S, Benedik P, Rajkovic U, Sustersic O, Rajkovic V. Design of a Recommendation System for Adding Support in the Treatment of Chronic Patients. *Stud Health Technol Inform.* 2016;225:879–80.
333. Troczynski M, Niemiec T, Wilczynska A. Assessment of three-level selective perinatal care based on the analysis of early perinatal death rates and cesarean sections in Poland in 2008. *Ginekol Pol.* 2009;80:670–7.
334. Truyen Tran, Dinh Phung, Luo W, Venkatesh S. Stabilized sparse ordinal regression for medical risk stratification. *KNOWLEDGE AND INFORMATION SYSTEMS.* 2015;43:555–82. doi:10.1007/s10115-014-0740-4.
335. Tukiendorf A. Cervix uteri cancer incidence in relation to ethnic situation in Opole province, Poland. *Cent Eur J Public Health.* 2002;10:88–92.
336. Ugon A, Philippe C, Pietrasz S, Ganascia J, Levy PP. OPTISAS a new method to analyse patients with Sleep Apnea Syndrome. *Stud Health Technol Inform.* 2008;136:547–52.
337. Valko M, Kveton B, Valizadegan H, Cooper GF, Hauskrecht M. Conditional Anomaly Detection with Soft Harmonic Functions. *Proc IEEE Int Conf Data Min.* 2011;2011:735–43. doi:10.1109/ICDM.2011.40.
338. Vallejo IL, Herrero HH, Sanz JJ, Martin JJ, Azarola EN. Diagnostic variability in a cohort of patients with multiple admissions in the last two decades. *ACTAS ESPANOLAS DE PSIQUIATRIA.* 2003;31:18–23.
339. Vani SN. Appropriate technologies for mother and child health care in developing countries. *Indian Pediatr.* 1989;26:1124–30.

340. Vilares M, Ribadas FJ, Graña J. Approximately Common Patterns in Shared-forests. In: New York, NY, USA: ACM; 2001. p. 73–80. doi:10.1145/502585.502599.
341. Voskoboinik A, Gutman MJ, Croagh D, Bell R, Saunder A, Gribbin J, Kanellis J. Implementation and learning of laproscopic donor nephrectomy by a non-transplant general surgeon with advanced laparoscopic skills. *Asian J Endosc Surg*. 2011;4:127–32. doi:10.1111/j.1758-5910.2011.00092.x.
342. Vossler DG, Am Haltiner, Schepp SK, Friel PA, Caylor LM, Morgan JD, Doherty MJ. Ictal stuttering - A sign suggestive of psychogenic nonepileptic seizures. *Neurology*. 2004;63:516–9. doi:10.1212/01.WNL.0000133208.57562.CB.
343. Vossler DG, Haltiner AM, Schepp SK, Friel PA, Caylor LM, Morgan JD, Doherty MJ. Ictal stuttering: a sign suggestive of psychogenic nonepileptic seizures. *Neurology*. 2004;63:516–9.
344. Vranken R, Coulombier D, Kenyon T, Koosimile B, Mavunga T, Coggin W, Binkin N. Use of a computerized tuberculosis register for automated generation of case finding, sputum conversion, and treatment outcome reports. *Int J Tuberc Lung Dis*. 2002;6:111–20.
345. Walley JD, McDonald M. Integration of mother and child health services in Ethiopia. *Trop Doct*. 1991;21:32–5. doi:10.1177/004947559102100113.
346. Wang Z, Chakraborty P, Mekaru SR, Brownstein JS, Ye J, Ramakrishnan N. Dynamic Poisson Autoregression for Influenza-Like-Illness Case Count Prediction. In: New York, NY, USA: ACM; 2015. p. 1285–1294. doi:10.1145/2783258.2783291.
347. Wang S, Chang X, Li X, Long G, Yao L, Sheng QZ. Diagnosis Code Assignment Using Sparsity-Based Disease Correlation Embedding. *IEEE TRANSACTIONS ON KNOWLEDGE AND DATA ENGINEERING*. 2016;28:3191–202. doi:10.1109/TKDE.2016.2605687.
348. Wang JT, Chirn G, Marr TG, Shapiro B, Shasha D, Zhang K. Combinatorial Pattern Discovery for Scientific Data: Some Preliminary Results. In: New York, NY, USA: ACM; 1994. p. 115–125. doi:10.1145/191839.191863.
349. Wang JT, Chirn G, Marr TG, Shapiro B, Shasha D, Zhang K. Combinatorial Pattern Discovery for Scientific Data: Some Preliminary Results. *SIGMOD Rec*. 1994;23:115–25. doi:10.1145/191843.191863.
350. Wang B, Lin C, Yang I. Constructing a Gene Team Tree in Almost  $O(N \lg N)$  Time. *IEEE/ACM Trans. Comput. Biol. Bioinformatics*. 2014;11:142–53. doi:10.1109/TCBB.2013.150.
351. Wang F, Liu C, Wang Y, Hu J, Yu G. A Graph Based Methodology for Temporal Signature Identification from HER: RETRACTED ARTICLE - NICHT BENUTZEN, ABGELEHNTER ARTIKEL. *AMIA Annu Symp Proc*. 2015;2015:1269–78.
352. Wang X, Wang F, Wang J, Qian B, Hu J. Exploring Patient Risk Groups with Incomplete Knowledge. In: ; 2013. p. 1223–1228. doi:10.1109/ICDM.2013.129.
353. Welch JL, Siek KA, Connelly KH, Astroth KS, McManus MS, Scott L, et al. Merging health literacy with computer technology: self-managing diet and fluid intake among adult hemodialysis patients. *Patient Educ Couns*. 2010;79:192–8. doi:10.1016/j.pec.2009.08.016.
354. White D, Choi H, Peloquin C, Zhu Y, Zhang Y. Secular trend of adhesive capsulitis. *Arthritis Care Res (Hoboken)*. 2011;63:1571–5. doi:10.1002/acr.20590.
355. Whyatt CP, Torres EB. The Social-dance: Decomposing Naturalistic Dyadic Interaction Dynamics to the 'Micro-level'. In: New York, NY, USA: ACM; 2017. p. 24:1. doi:10.1145/3077981.3078055.
356. Wiesner M, Pfeifer D. Adapting Recommender Systems to the Requirements of Personal Health Record Systems. In: New York, NY, USA: ACM; 2010. p. 410–414. doi:10.1145/1882992.1883053.
357. Wilhelms J, van Gelder A. Octrees for Faster Isosurface Generation. *ACM Trans. Graph*. 1992;11:201–27. doi:10.1145/130881.130882.
358. Winter A, Brigl B, Funkat G, Haeber A, Heller O, Wendt T. 3LGM(2)-Modeling to support management of health information systems. *Int J Med Inform*. 2007;76:145–50. doi:10.1016/j.ijmedinf.2006.07.007.
359. Wongsuphasawat K, Gotz D. Exploring Flow, Factors, and Outcomes of Temporal Event Sequences with the Outflow Visualization. *IEEE Trans Vis Comput Graph*. 2012;18:2659–68. doi:10.1109/TVCG.2012.225.
360. Wu T, Moulton V, Steel M. Refining Phylogenetic Trees Given Additional Data: An Algorithm Based on Parsimony. *IEEE/ACM Trans. Comput. Biol. Bioinformatics*. 2009;6:118–25. doi:10.1109/TCBB.2008.100.
361. WU Y, Zhu X, Li L, Fan W, Jin R, Zhang X. Mining Dual Networks: Models, Algorithms, and Applications. *ACM Trans. Knowl. Discov. Data*. 2016;10:40:1. doi:10.1145/2785970.
362. Xie W, Wu J. Mining positive and negative weighted association rules in medical records without user-specified weights based on HITS model. In: ; 2010. p. 2325–2329. doi:10.1109/BMEI.2010.5639578.
363. Xie C, Yang P, Yang Y. Open Knowledge Accessing Method in IoT-based Hospital Information System for Medical Record Enrichment. *IEEE Access*. 2018;PP:1. doi:10.1109/ACCESS.2018.2810837.
364. Yamashita T, Onimura N, Soejima H, Nakashima N, Hirokawa S. Graph Clustering System for Text-Based Records in a Clinical Pathway. *Stud Health Technol Inform*. 2017;245:649–52.
365. Yamin A, Khan SA, Yasin UU. Automated system of hess screen for diagnosis of paralytic strabismus using computer aided diagnosis. In: ; 2013. p. 300–305. doi:10.1109/IST.2013.6729710.
366. Yesha R, Gangopadhyay A, Siegel E. A graph-based method for analyzing electronic medical records. In: ; 2015. p. 1036–1041. doi:10.1145/2808797.2808806.
367. Yin S, Chen D, Le J. Deep Neural Network Based on Translation Model for Diabetes Knowledge Graph. In: ; 2017. p. 318–323. doi:10.1109/CBD.2017.62.

368. Yoon S, Cohen B, Cato KD, Liu J, Larson EL. Visualization of Data Regarding Infections Using Eye Tracking Techniques. *J Nurs Scholarsh*. 2016;48:244–53. doi:10.1111/jnu.12204.
369. Yoon D, Park I, Schuemie MJ, Park MY, Kim JH, Park RW. A quantitative method for assessment of prescribing patterns using electronic health records. *PLoS One*. 2013;8:e75214. doi:10.1371/journal.pone.0075214.
370. Yousefi A, Mastouri N, Sartipi K. Scenario-oriented information extraction from electronic health records. In: ; 2009. p. 1–5. doi:10.1109/CBMS.2009.5255451.
371. Zamora M, Baradad M, Amado E, Cordero S, Limón E, Ribera J, et al. Characterizing chronic disease and polymedication prescription patterns from electronic health records. In: ; 2015. p. 1–9. doi:10.1109/DSAA.2015.7344870.
372. Zenios S. Information Technology in Health Care Systems: Barriers to Adoption. In: ; 2006. p. 52. doi:10.1109/ICCGI.2006.35.
373. Zhang J, Gong J, Barnes L. HCNN: Heterogeneous Convolutional Neural Networks for Comorbid Risk Prediction with Electronic Health Records. In: ; 2017. p. 214–221. doi:10.1109/CHASE.2017.80.
374. Zhang S, Liu L, Li H, Xiao Z, Cui L. MTPGraph: A Data-Driven Approach to Predict Medical Risk Based on Temporal Profile Graph. In: ; 2016. p. 1174–1181. doi:10.1109/TrustCom.2016.0191.
375. Zhang H, Mehotra S, Liebovitz D, Gunter CA, Malin B. Mining Deviations from Patient Care Pathways via Electronic Medical Record System Audits. *ACM Trans. Manage. Inf. Syst*. 2013;4:17:1. doi:10.1145/2544102.
376. Zhang P, Wang F, Hu J, Sorrentino R. Towards personalized medicine: leveraging patient similarity and drug similarity analytics. *AMIA Jt Summits Transl Sci Proc*. 2014;2014:132–6.
377. Zhang Z, Wang H, Wang C, Fang H. Cluster-based Epidemic Control Through Smartphone-based Body Area Networks. *IEEE Trans Parallel Distrib Syst*. 2015;26:681–90. doi:10.1109/TPDS.2014.2313331.
378. Zhang M, Zhang H, Tjandra D, Wong STC. DBMap: a space-conscious data visualization and knowledge discovery framework for biomedical data warehouse. *IEEE Transactions on Information Technology in Biomedicine*. 2004;8:343–53. doi:10.1109/TITB.2004.832550.
379. Zhao S. Mining Medical Causality for Diagnosis Assistance. In: New York, NY, USA: ACM; 2017. p. 841. doi:10.1145/3018661.3022752.
380. Zheng Z, Wan X. Graph-Based Multi-Modality Learning for Clinical Decision Support. In: New York, NY, USA: ACM; 2016. p. 1945–1948. doi:10.1145/2983323.2983880.
381. Zhou X, Han H, Chankai I, Prestrud A, Brooks A. Approaches to Text Mining for Clinical Medical Records. In: New York, NY, USA: ACM; 2006. p. 235–239. doi:10.1145/1141277.1141330.
382. Zirkind G. Genetic Database Optimization: How Data Inspection and Consideration, Provides for Index Compression and Record Access Optimization of Genetic Databases. In: New York, NY, USA: ACM; 2006. p. 68–76. doi:10.1145/1125170.1125194.
383. ZWEIGENBAUM P. MENELAS - AN ACCESS SYSTEM FOR MEDICAL RECORDS USING NATURAL-LANGUAGE. *Comput Methods Programs Biomed*. 1994;45:117–20. doi:10.1016/0169-2607(94)90029-9.
